# Supplementary material for: Origin of life: protoribosome forms peptide bonds and links RNA and protein dominated worlds
Source: PubMed Central journal article supplement — Nucleic Acids Res. 2022 Feb 7;50(4):1815–28. doi: 10.1093/nar/gkac052 (PMC8886871; doi:10.1093/nar/gkac052), 2022-02-07
Supplement: gkac052_supplemental_file.pdf [file gkac052_supplemental_file.pdf]

## Supplementary Materials for

### **Origin of life: protoribosome forms peptide bonds and links RNA and protein dominated worlds**

**Authors:** Tanaya Bose<sup>1</sup>, Gil Fridkin<sup>1,2</sup>, Chen Davidovich<sup>1†</sup>, Miri Krupkin<sup>1‡</sup>, Nikita Dinger<sup>1§</sup>, Alla Falkovich<sup>1</sup>, Yoav Peleg<sup>1</sup>, Ilana Agmon<sup>3,4</sup>, Anat Bashan<sup>1</sup>, Ada Yonath<sup>1\*</sup>

Correspondence to: [ada.yonath@weizmann.ac.il](mailto:ada.yonath@weizmann.ac.il)

#### **This PDF file includes:**

Supplementary Text  
Figs. S1 to S21  
Tables S1

**Figure S1: A two-dimensional representation of the RNA constructs designed based on part of *T. thermophilus* 23S rRNA around the PTC. The nucleotides highlighted in yellow were used as the sequences of the RNA constructs tt\_A1, tt\_P1, tt\_A1P1, tt\_A2, tt\_P2 and tt\_A2P2, respectively. Green stretches indicate direct connection between nucleotides and green lines represents positions where the hyper stable CUUCGG hairpin was inserted. rRNA helices and nucleotide numbers (*E. coli* numbering) are designated in blue and black, respectively. A-loop and P-loop are pointed with red arrows.**

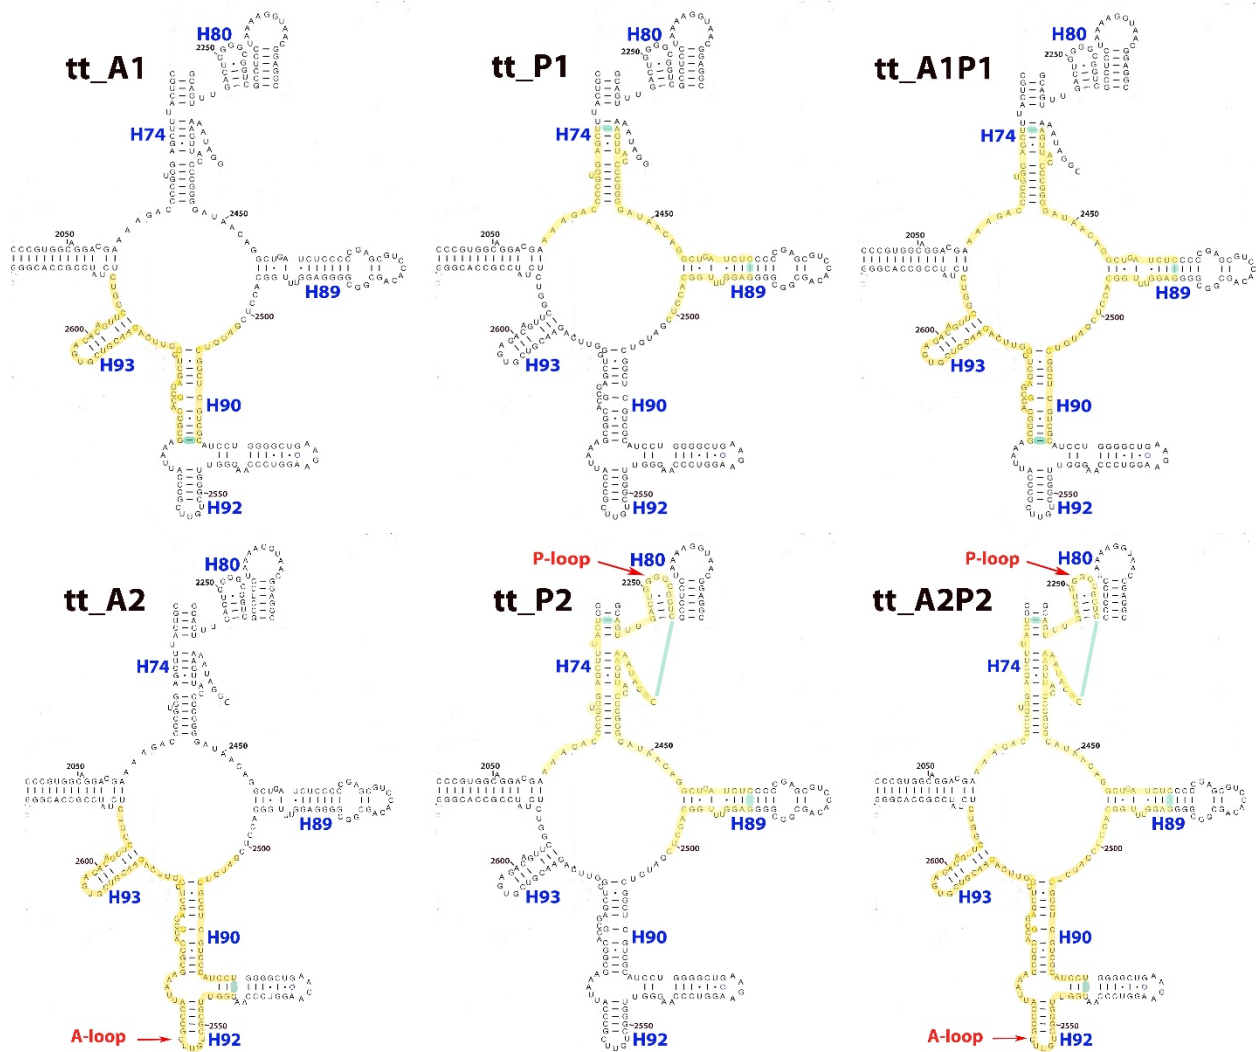

**Figure S2: RNA constructs sequence alignment** (G- red, A- green, C- orange and U- blue). **A.** The alignment of A-reg short and long sequences. **B.** The alignment of P-reg minimal and extended sequences. GUGA addition to tt\_P1c and tt\_P2c is marked with a yellow box. **C.** The alignment of long sequences which represent the full proto-ribosome. **D.** The alignment of various P-reg minimal sequences. rRNA sequences were aligned using Clustal omega server (Sievers, Wilm et al. 2011) and imaged using Jalview (Waterhouse, Procter et al. 2009).

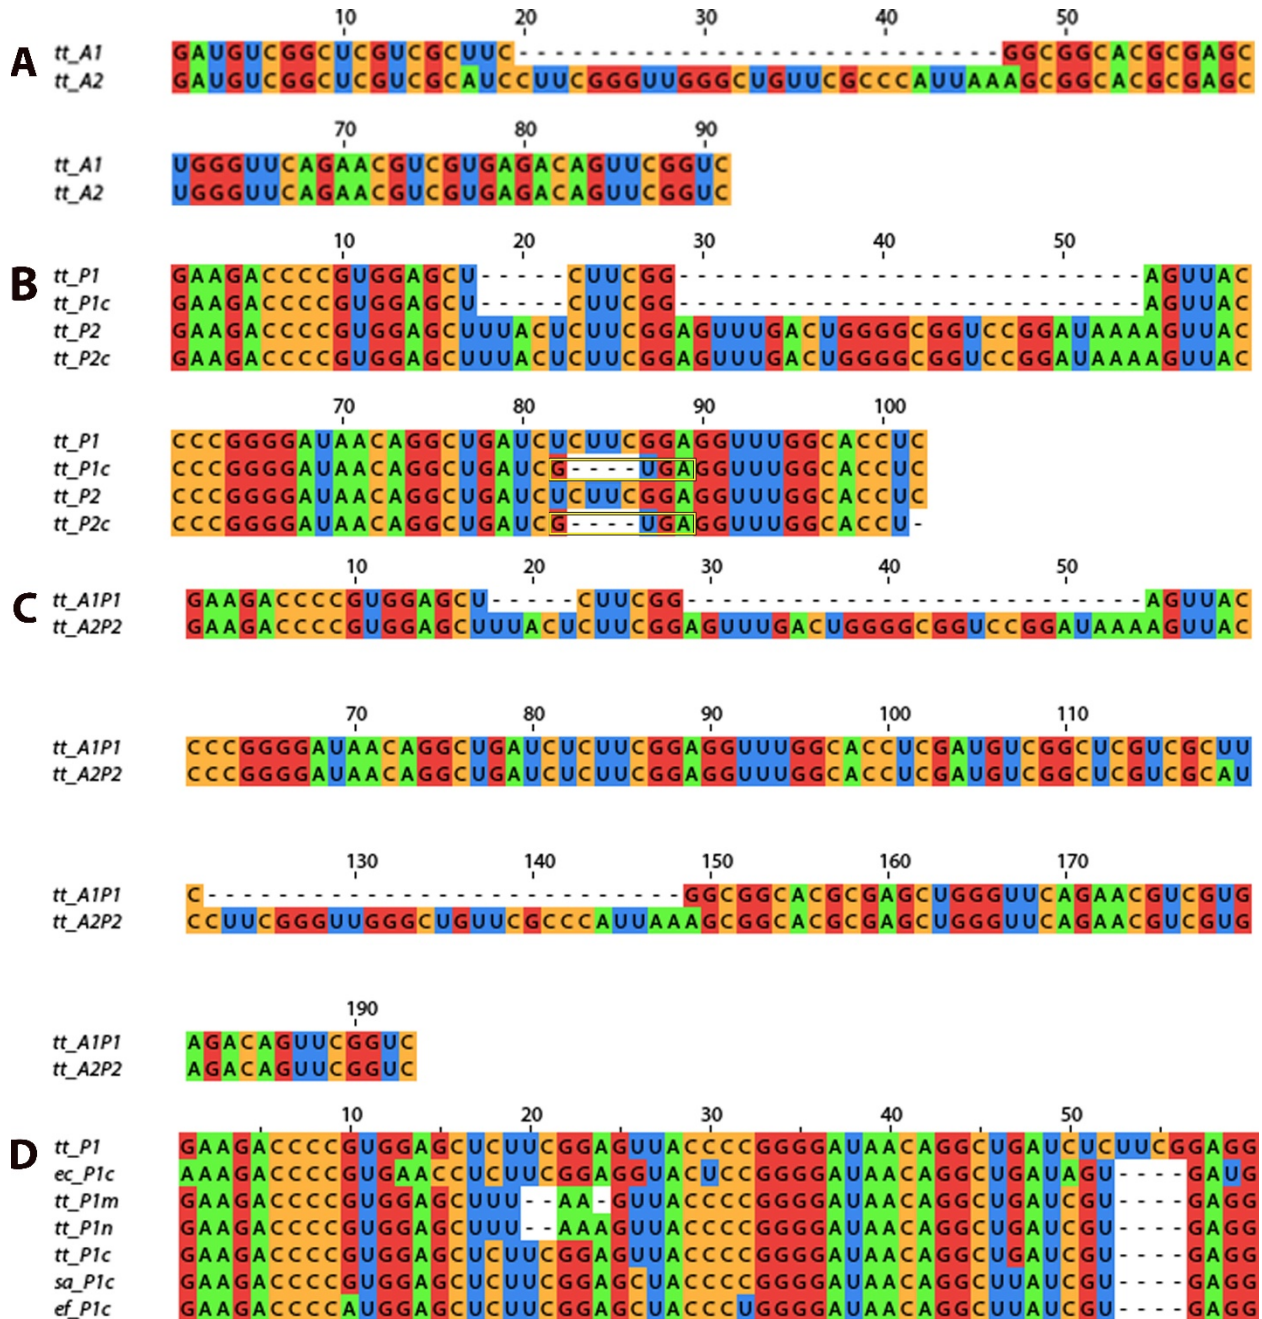

**Figure S3: Design schemes of the constructs tt\_P1c, tt\_P1n and tt\_P1m.** **A.** Incorporation of a GNRA tetraloop in construct tt\_P1 afforded tt\_P1c. **B.** Constructs tt\_P1n and tt\_P1m design. Natural shorter UUAA and UUA loops were added to H74 as shown in the upper image.

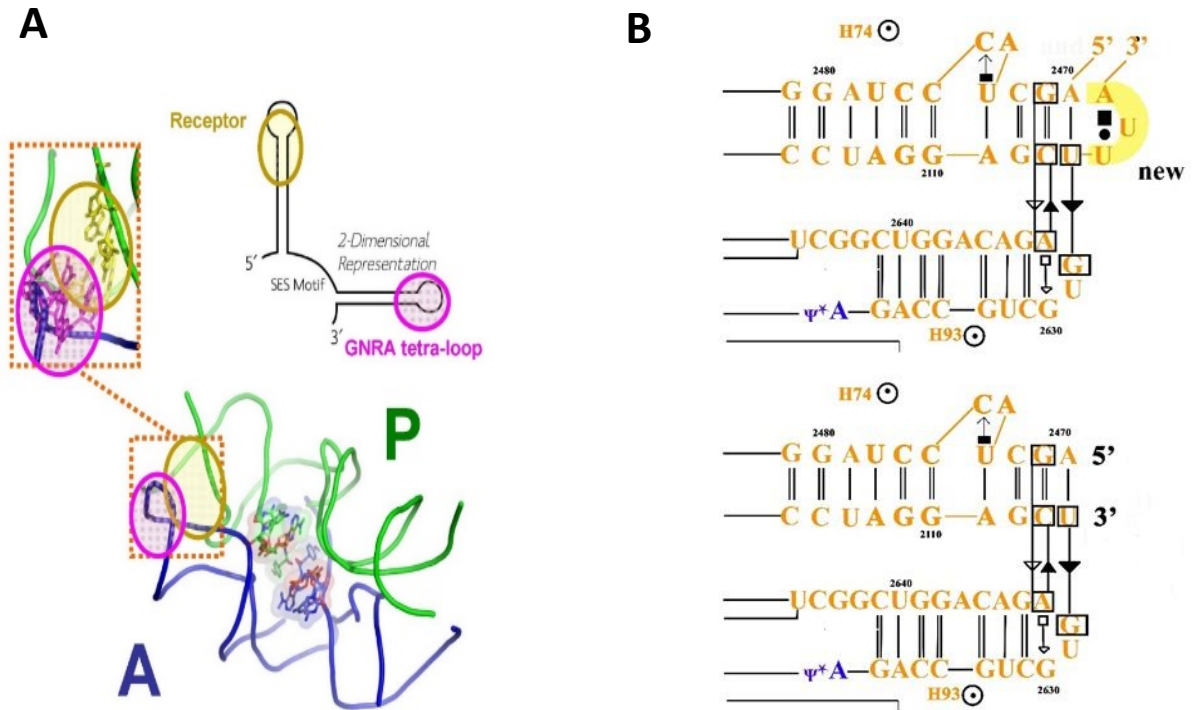

**Figure S4: 2D structure predictions of the protoribosome constructs.** All predictions were calculated using mfold (66) where  $\Delta G$  values are refined at 37<sup>0</sup>C.

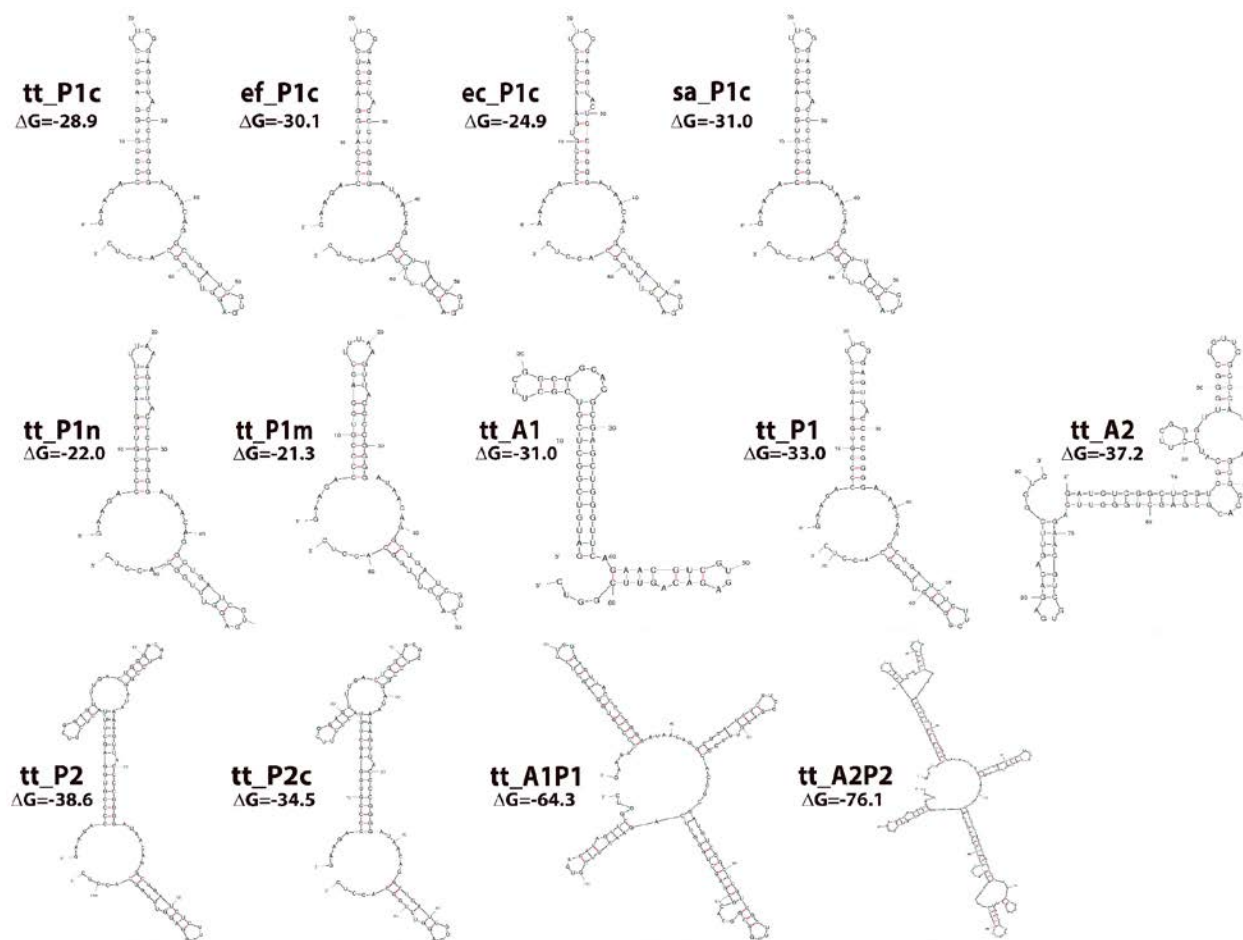

**Figure S5: 2D structure predictions of the protoribosome constructs.** All predictions were calculated using RNA structure (67) where  $\Delta G$  values are refined at 37°C.

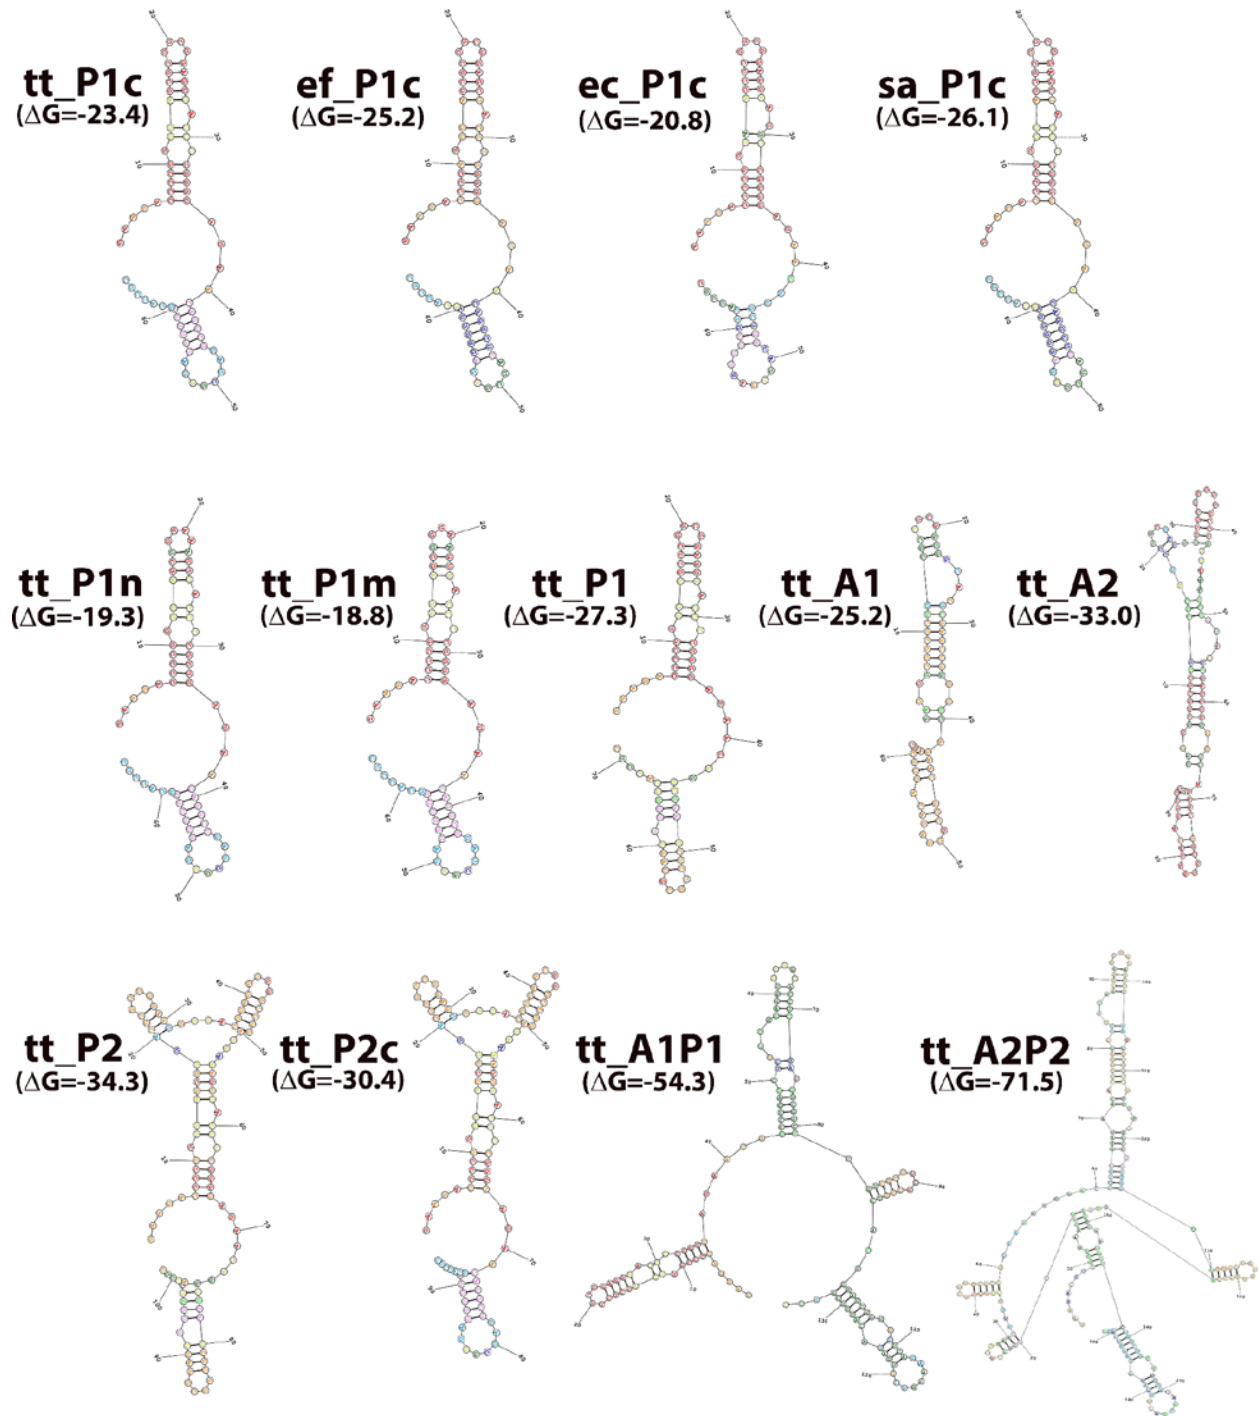

**Figure S6. Denaturing gels of the RNA constructs: A.** Purified tt\_P1, tt\_P1c, tt\_P2, tt\_P2c, tt\_A1P1 and tt\_A2P2 RNA constructs (lanes 4-9). **B.** Purchased ec\_p1c, hm\_p1c, tt\_p1m, tt\_p1n, tt\_A1 and tt\_A2 RNA constructs (lanes 4-9). **C.** Purified sa\_p1c and ef\_p1c RNA constructs (lanes 4-5). **D.** Denaturing gel of the active constructs after fragment reaction of 24h at 37<sup>0</sup>C (lanes 4-8). A single strand RNA (ssRNA) ladder and two DNA ladders (ultralow range (ULR) and 50 base pair (50BP) were used as reference (lanes 1-3). 10% polyacrylamide was used for all gels presented.

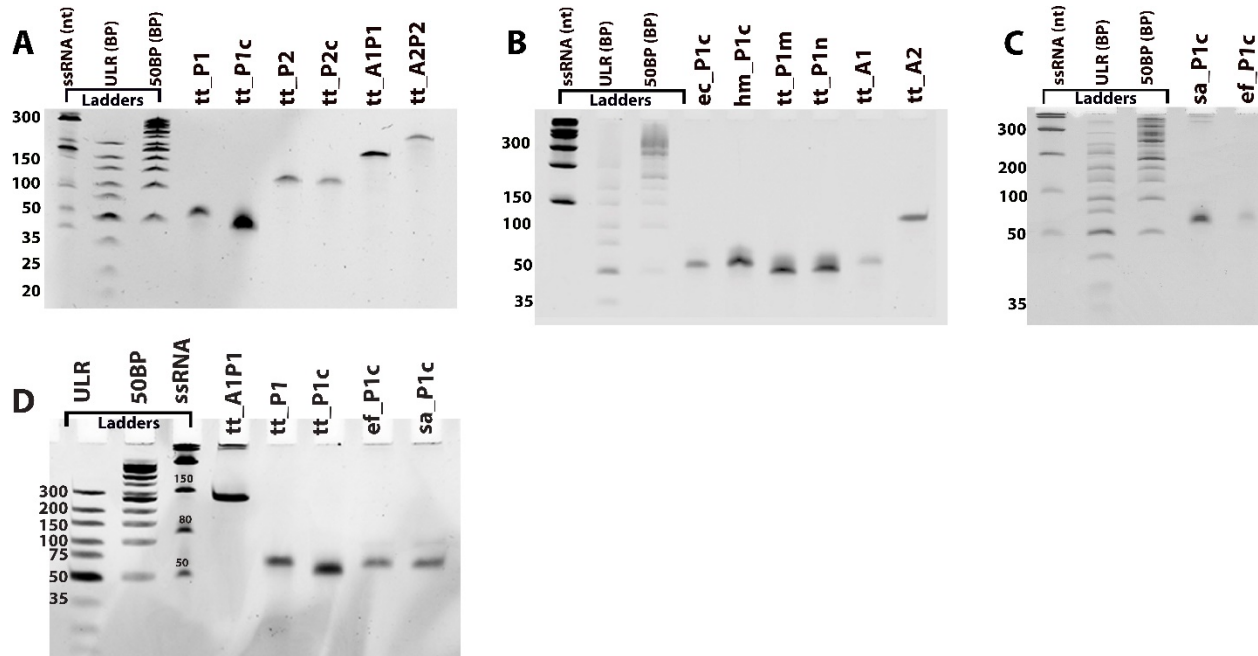

**Figure S7: Labeling of RNA oligonucleotides with Fluorecein-5-thiosemicarbazide (FTSC).** Sodium periodate was used to cleave the cis diol (3' termini) of RNA into 2',3'-dialdehyde and then, fluorescein-5-thiosemicarbazide, was added to the quenched reaction mixture to label the 3' terminus of RNA through a condensation reaction between the carbazide and the aldehyde.

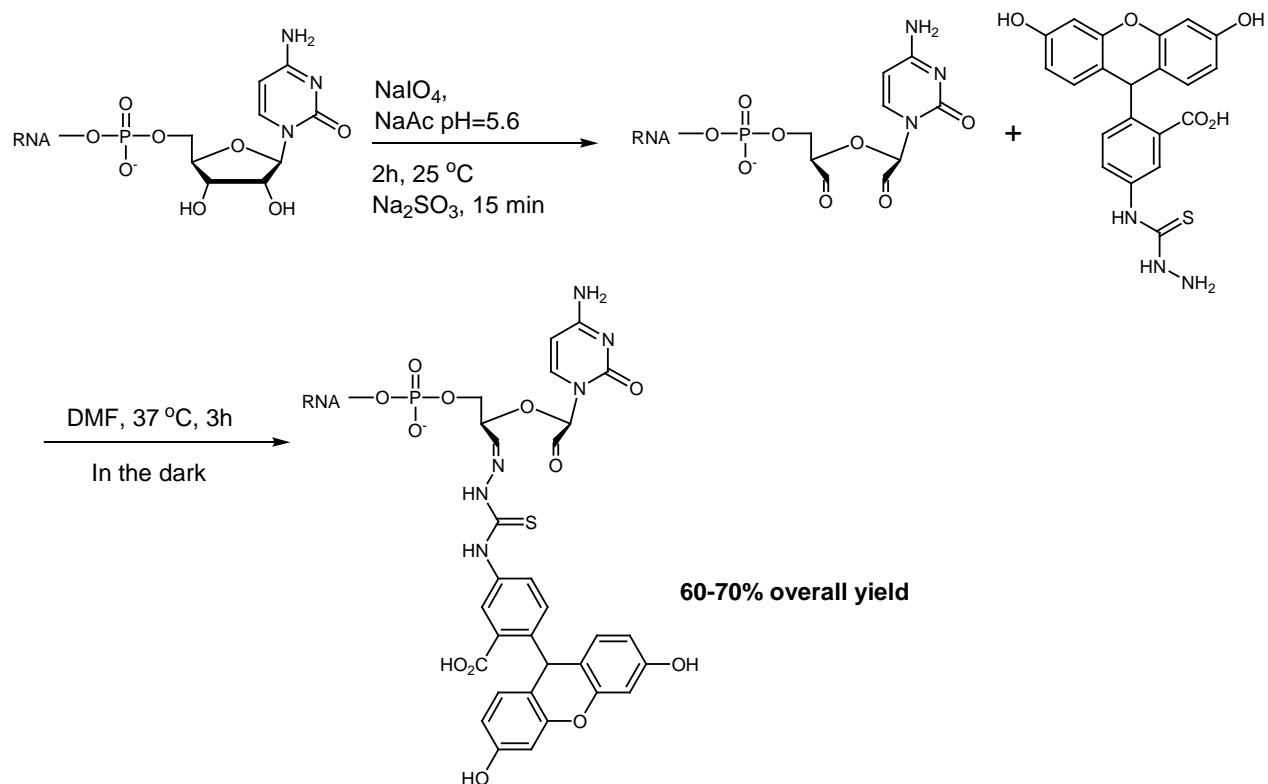



**Figure S8: MALDI spectra of the fragment reaction between CCA- pcb and C-Pmn in the presence of the RNA constructs at 37°C. A.** Positive (50S) and negative controls (no RNA) and CHCA matrix. **B.** Constructs tt\_A1, tt\_P1. **C.** Constructs sa\_P1c, tt\_P1c. **D.** Constructs tt\_A1P1, tt\_A2P2. **E.** Constructs tt\_A2, ec\_P1c. **F.** Constructs tt\_P1n and tt\_P1m. **G.** Constructs tt\_P2 and tt\_P2c. **H.** Construct cm\_tt\_P1c. The starting material CCA- pcb and the product C-Pmn-pcb are designated by S and P throughout.

**A**

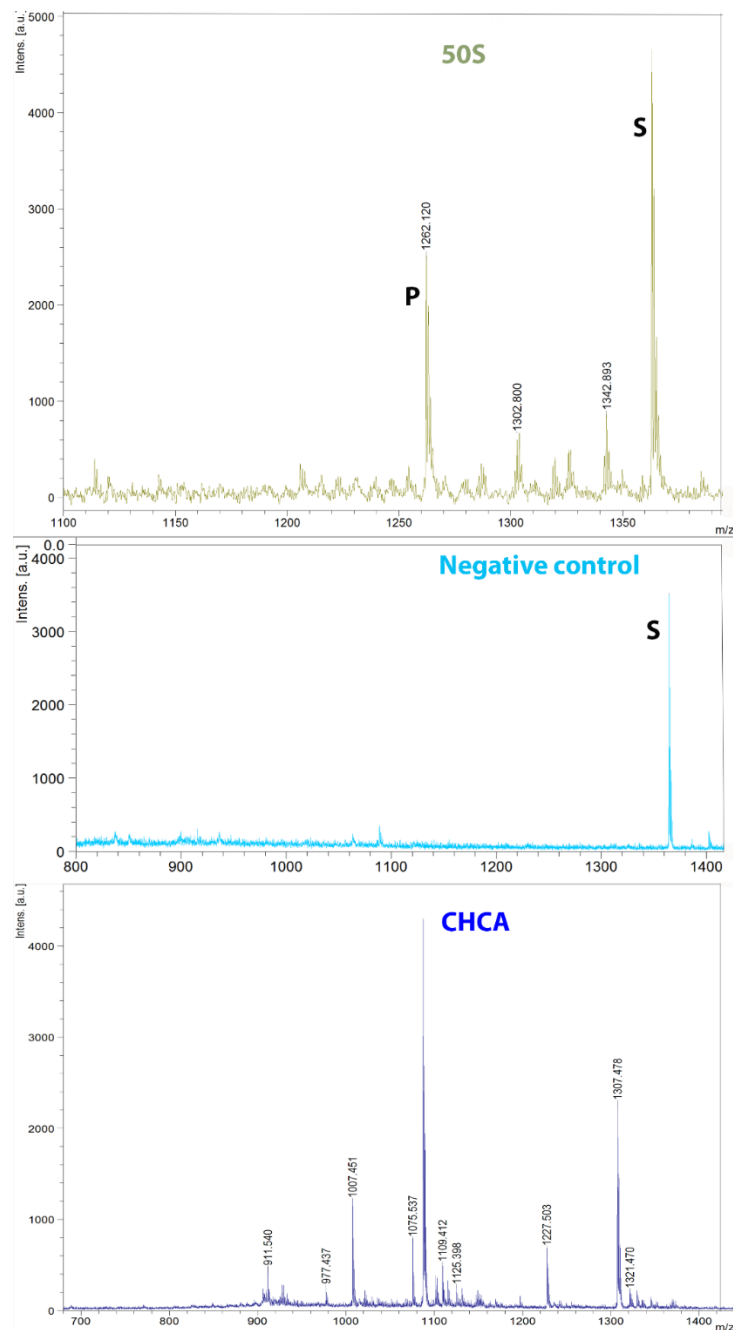

**B**

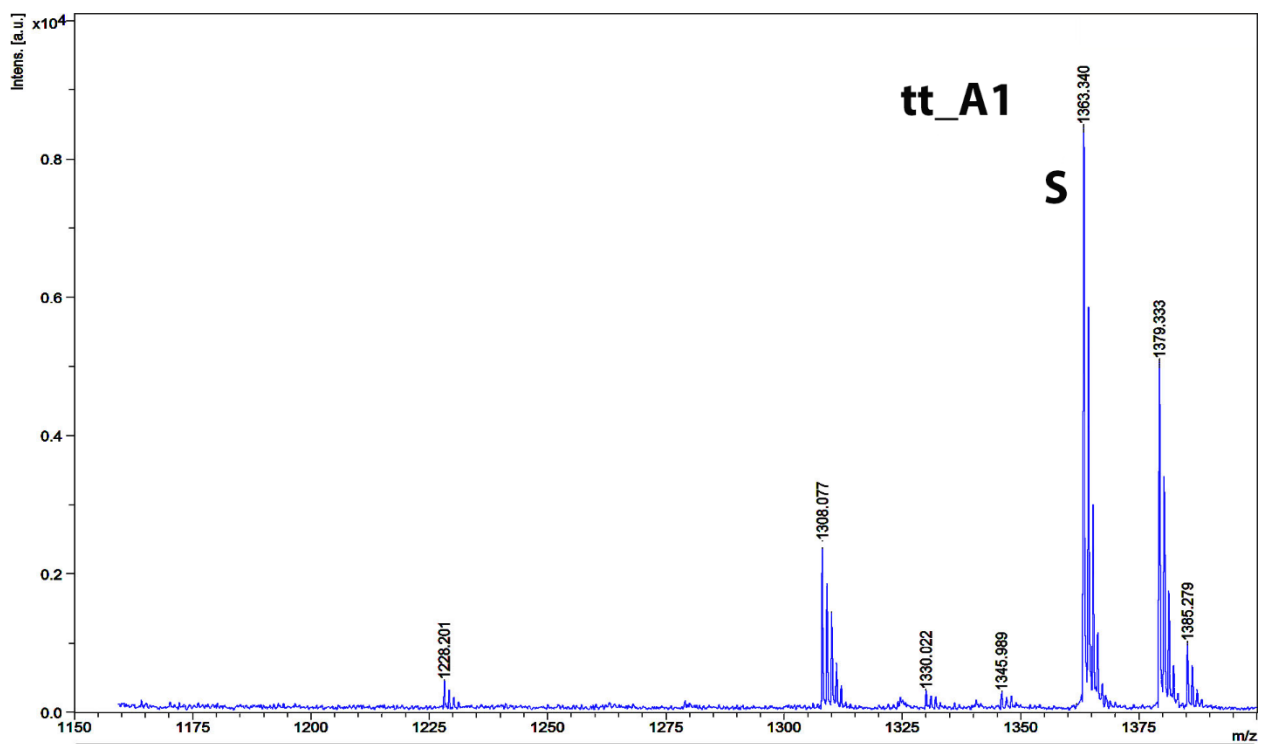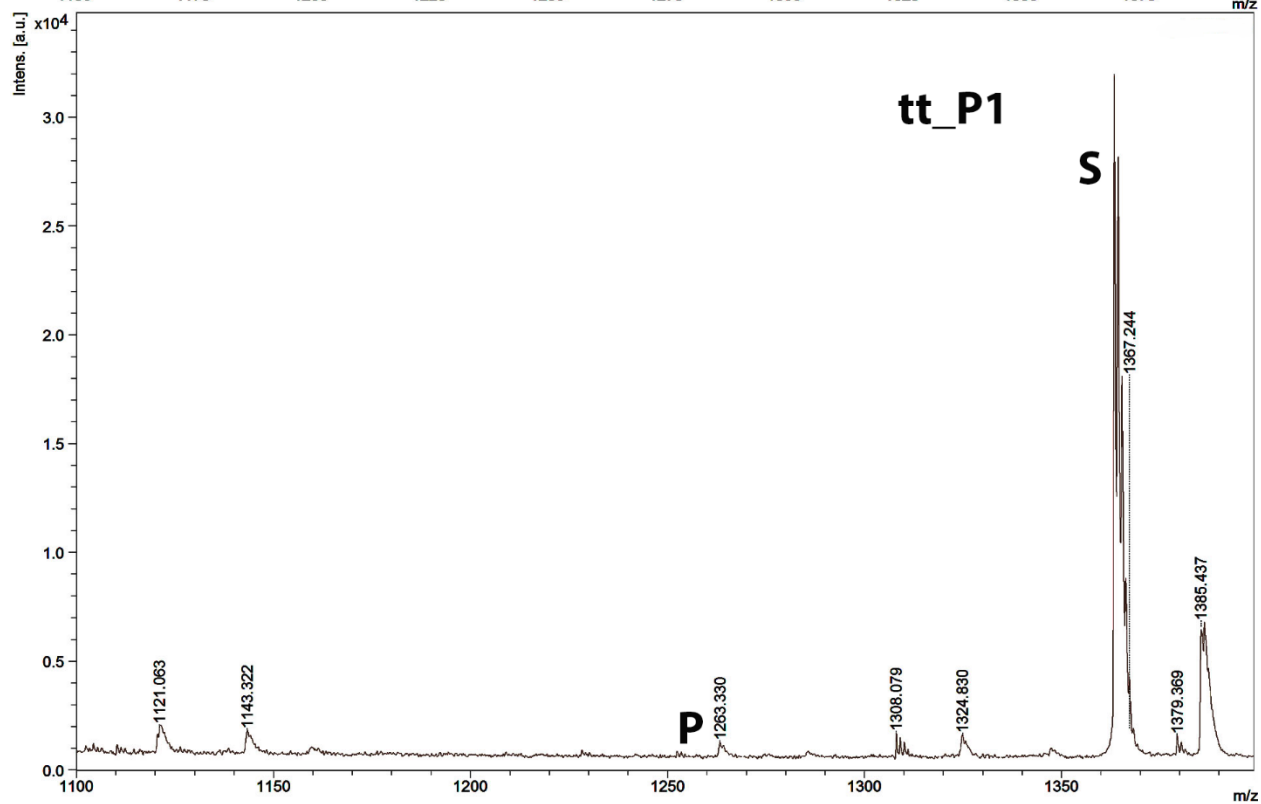

C

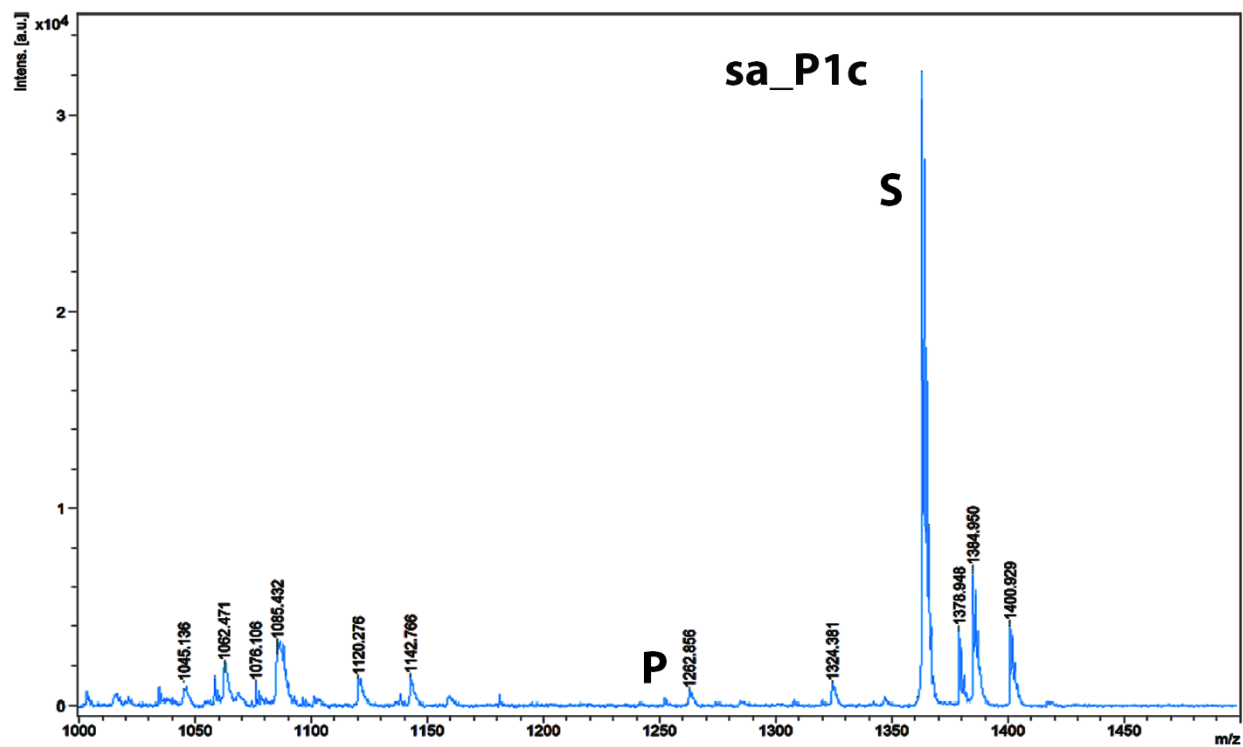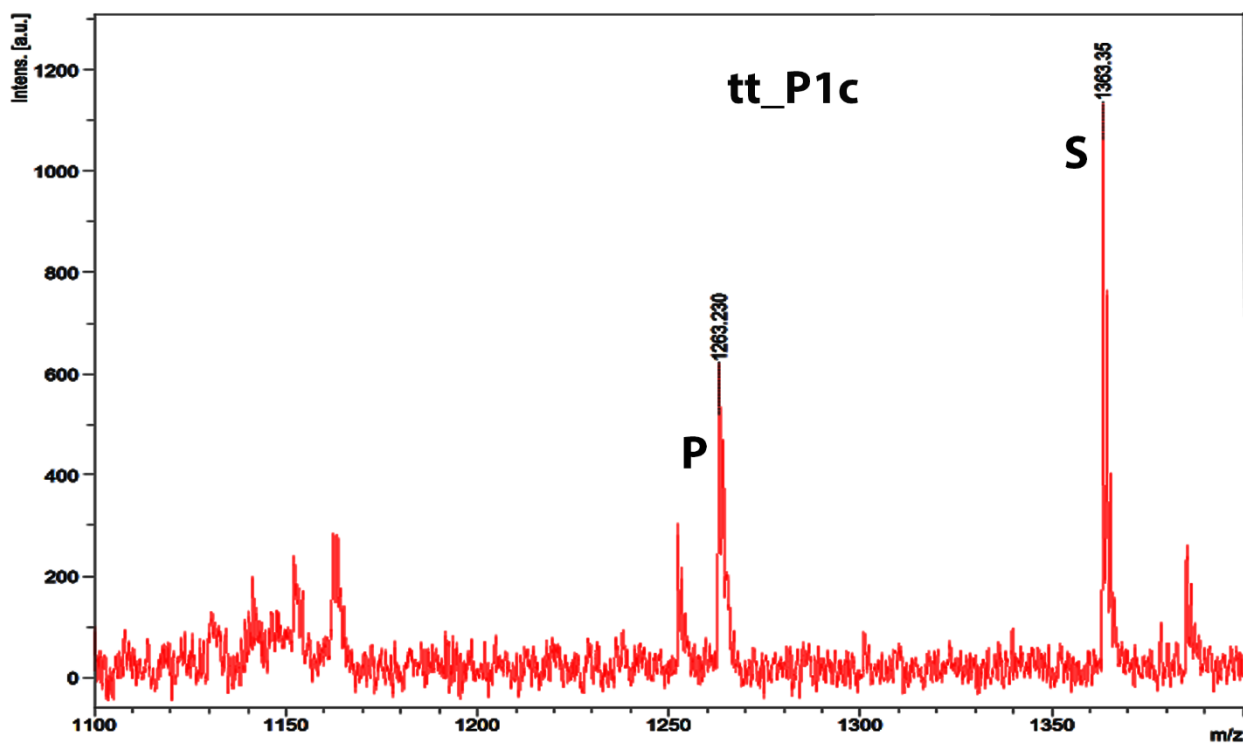

**D**

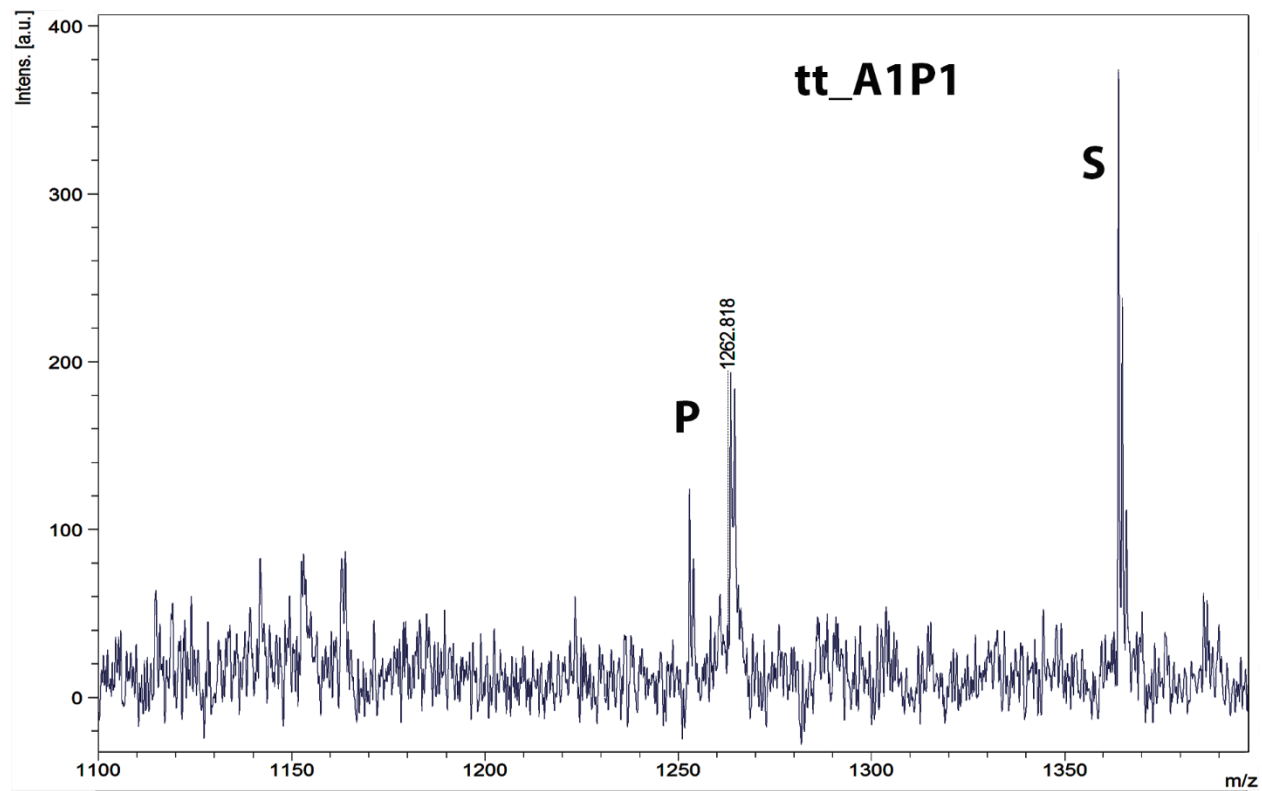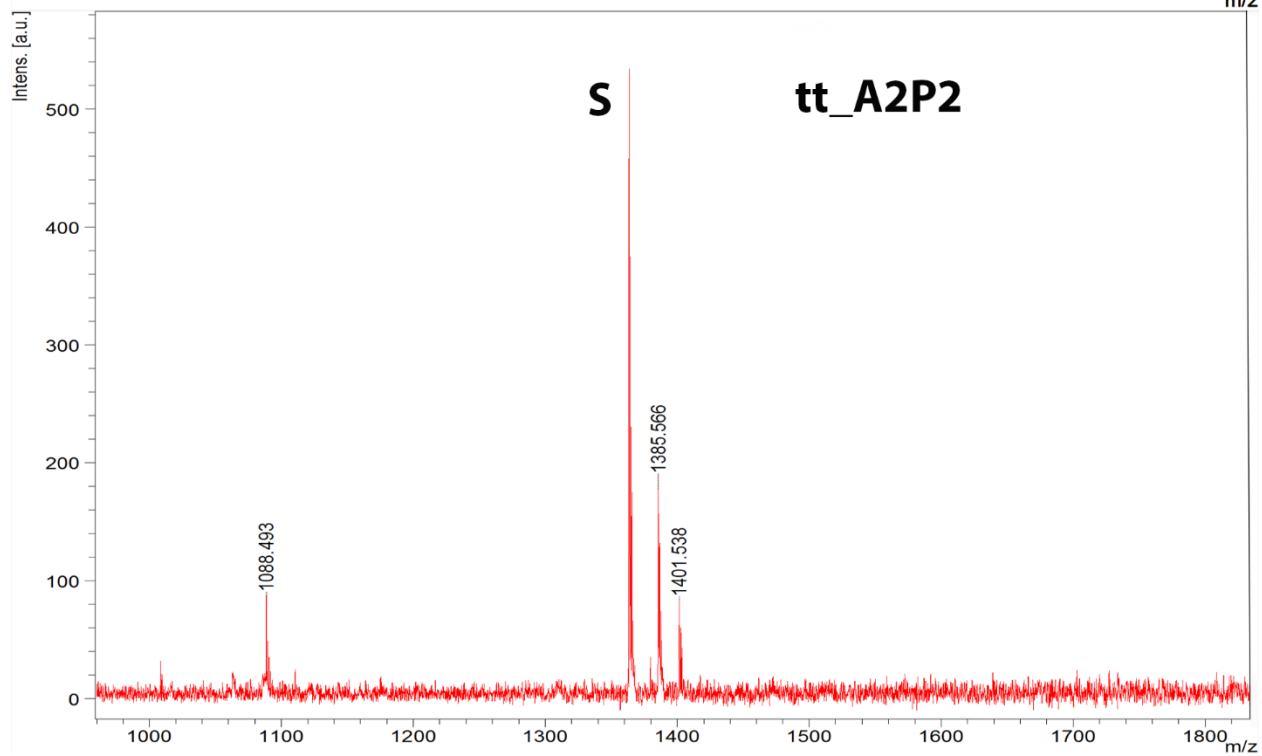

**F**

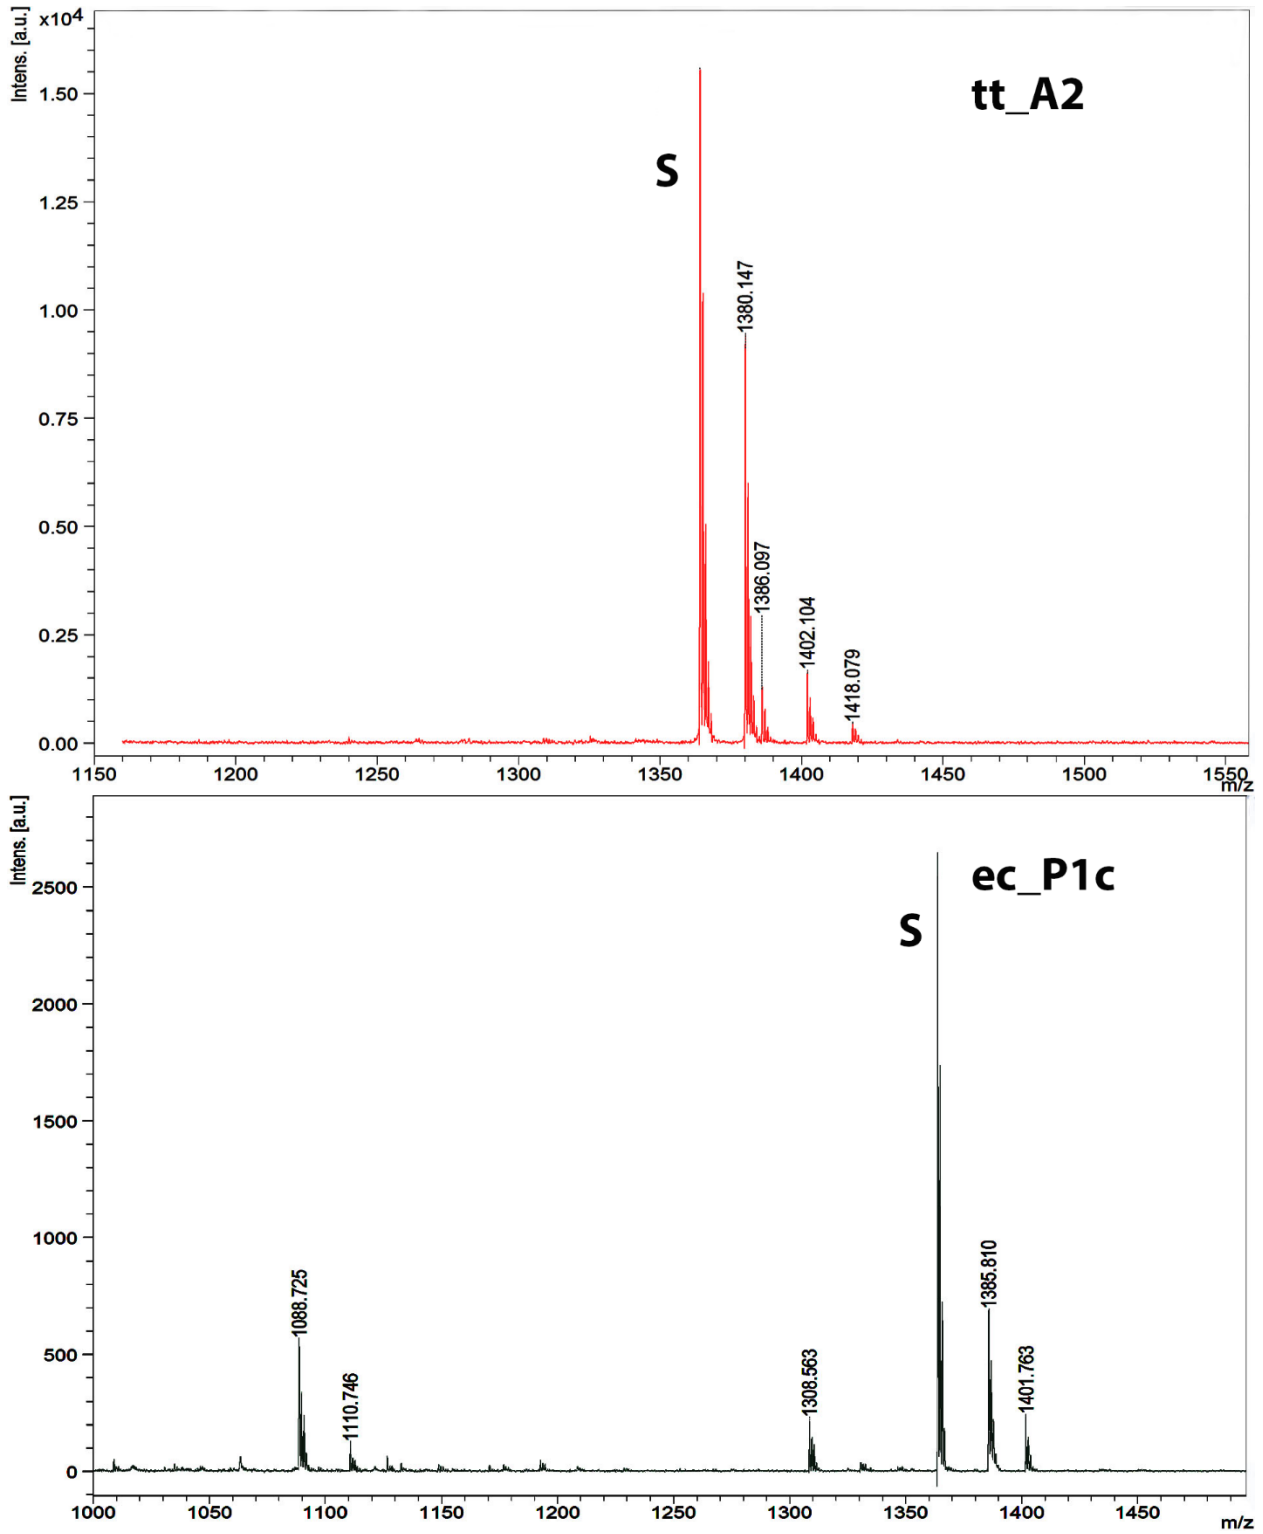

**F**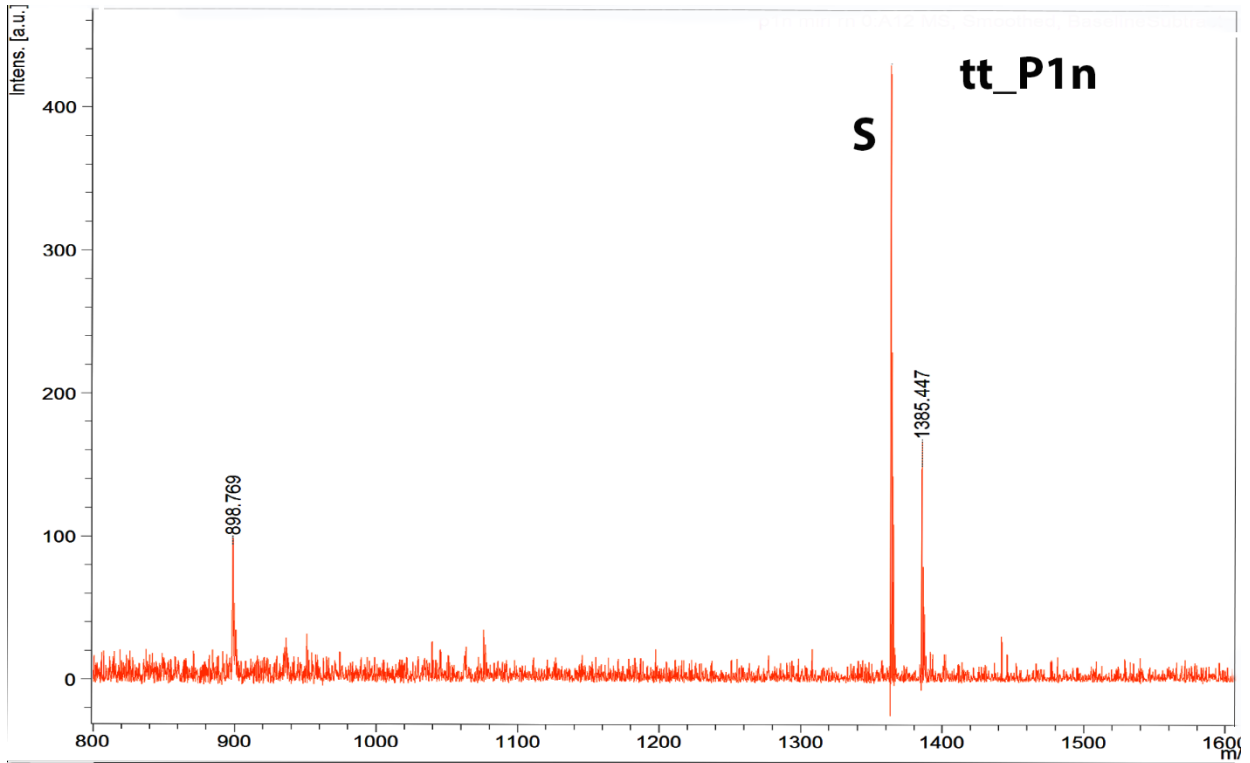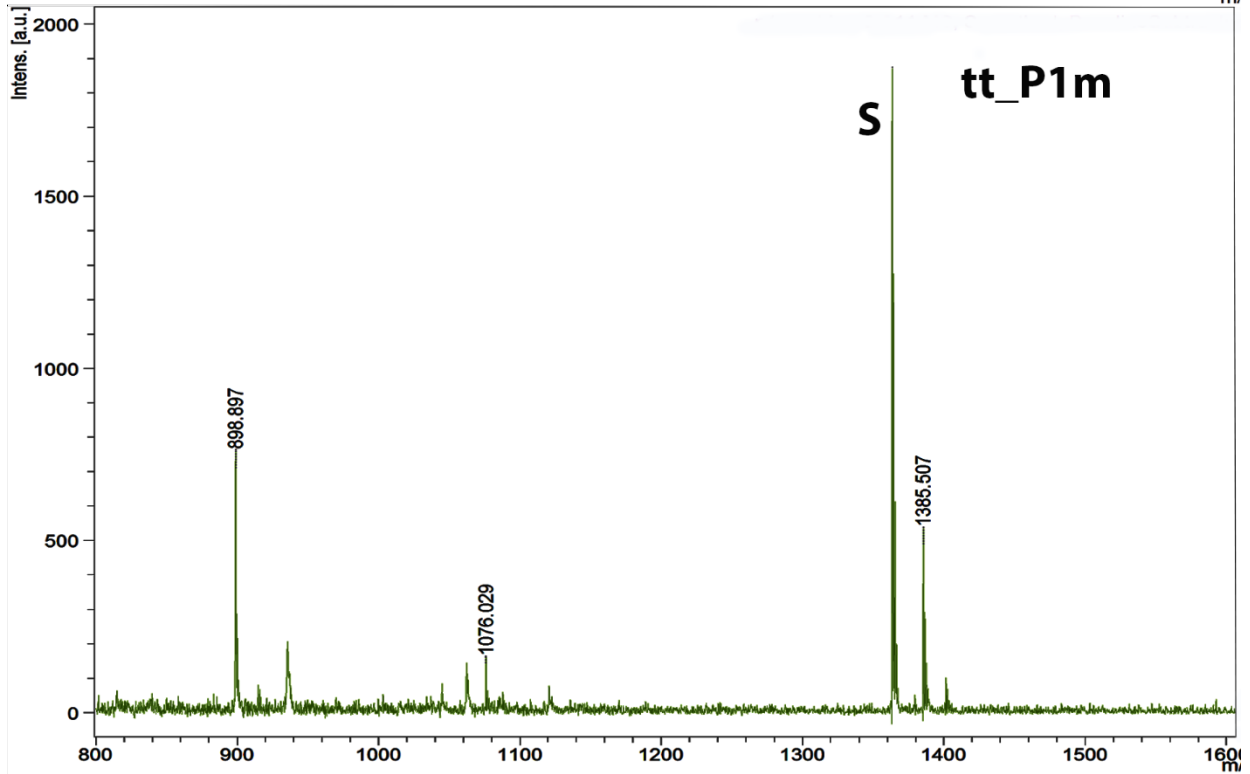

G

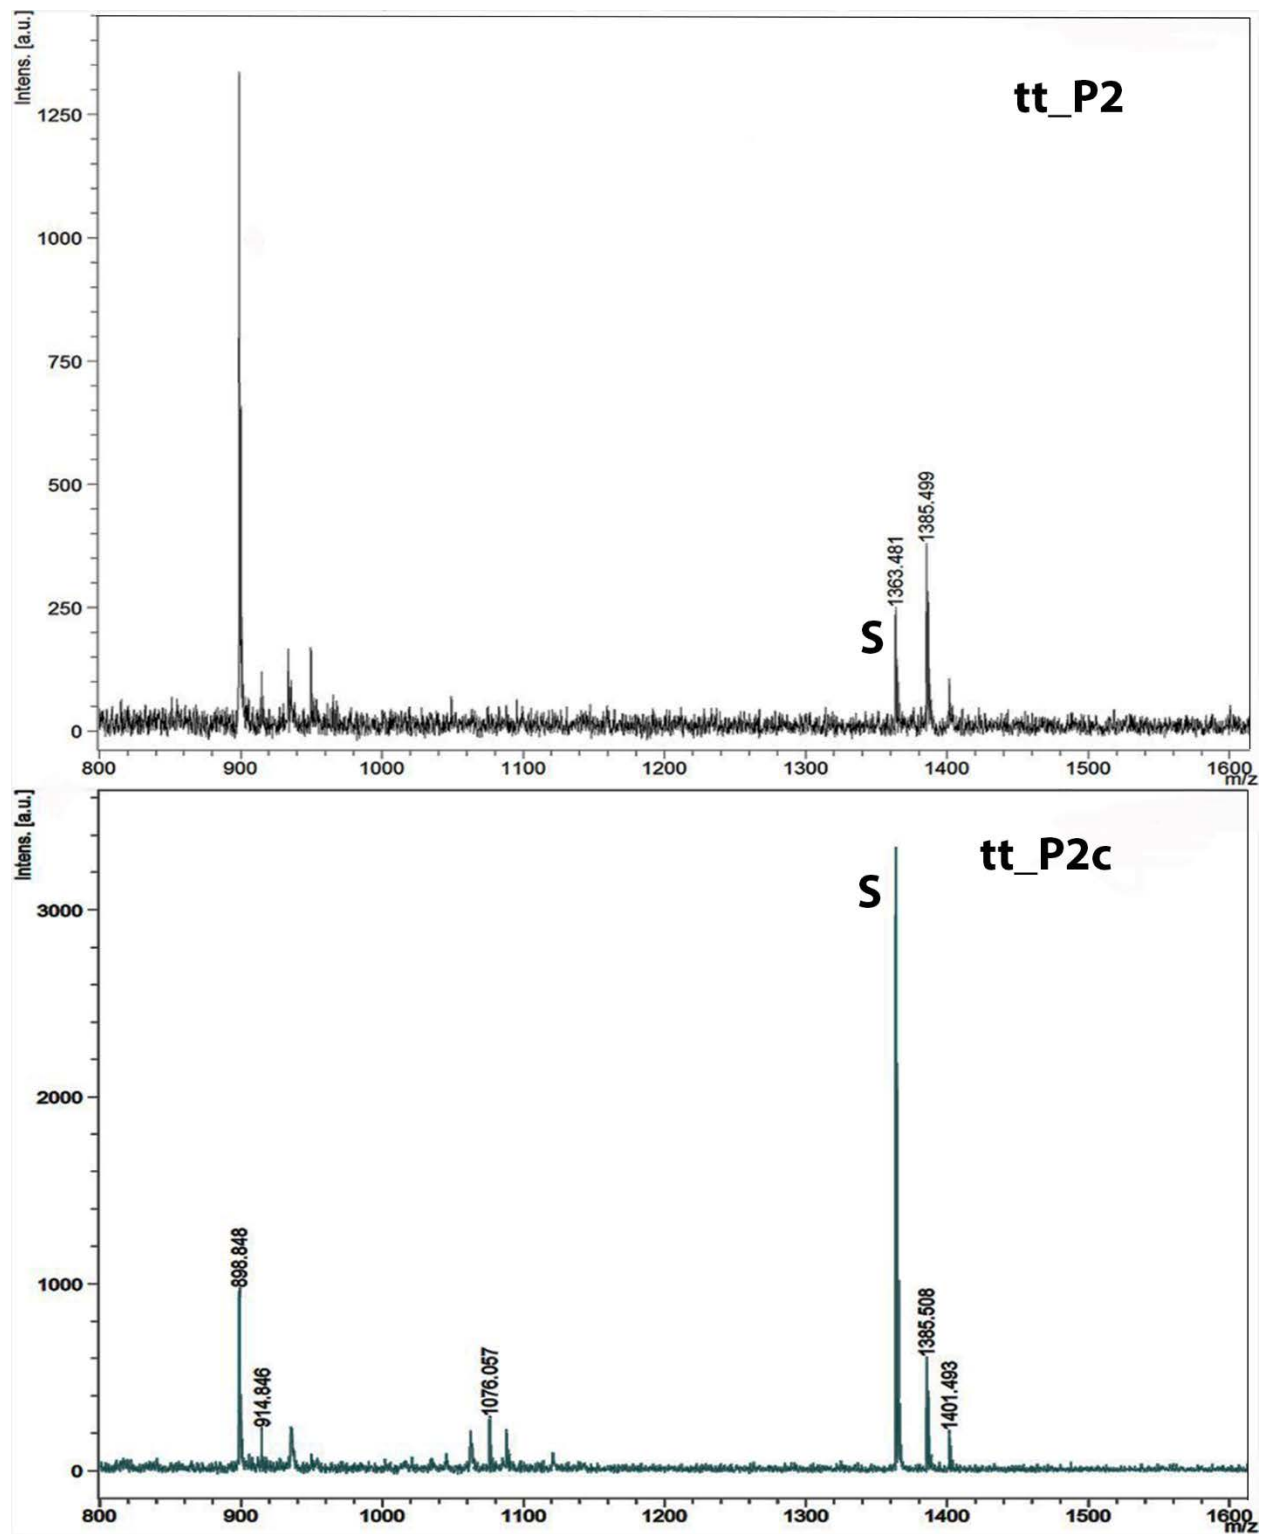

H

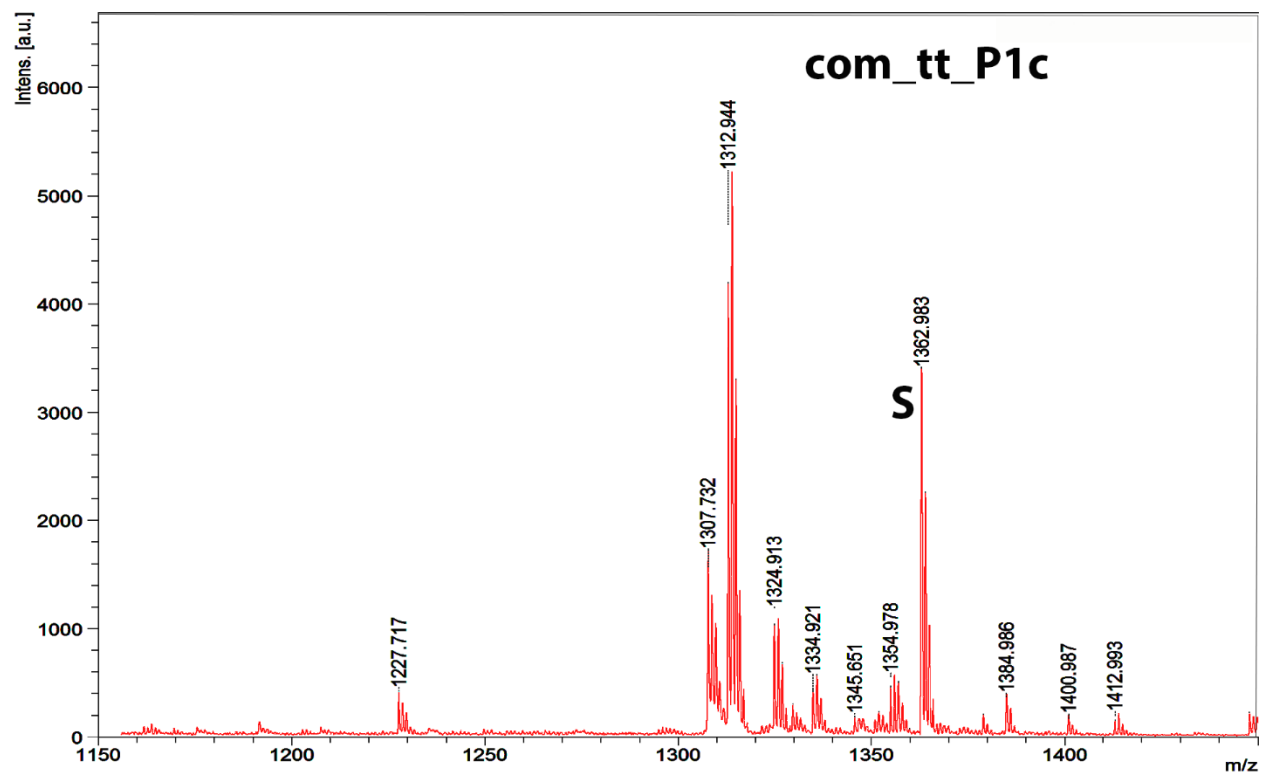



Figure S9: LC-MS spectra of A. tt\_A1P1 and tt\_P1 B. sa\_P1c and tt\_P1c

A

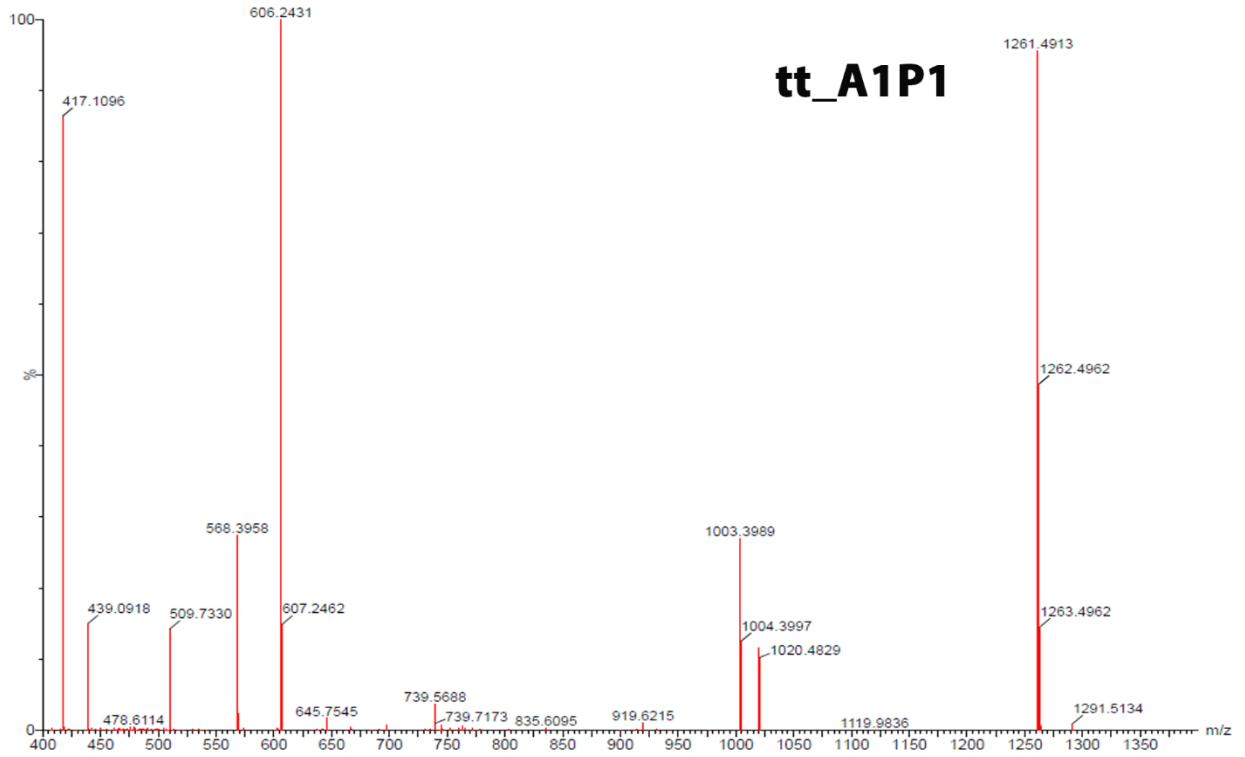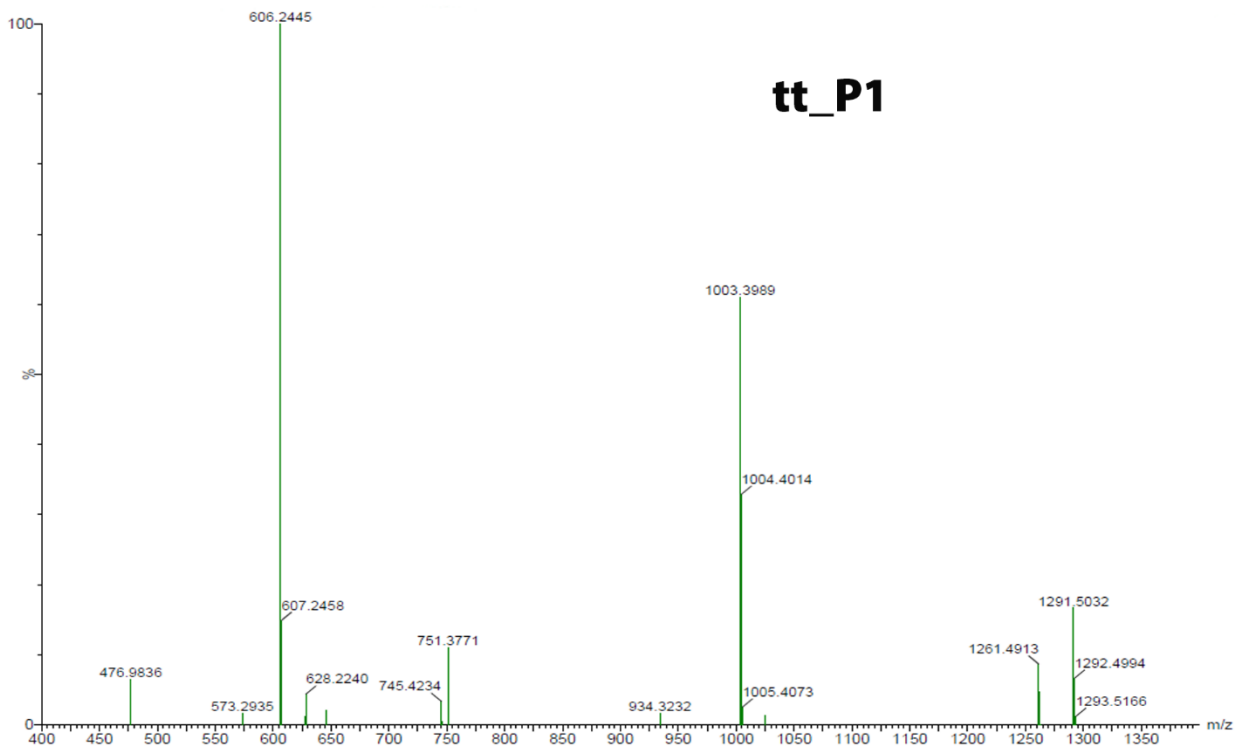

**B**

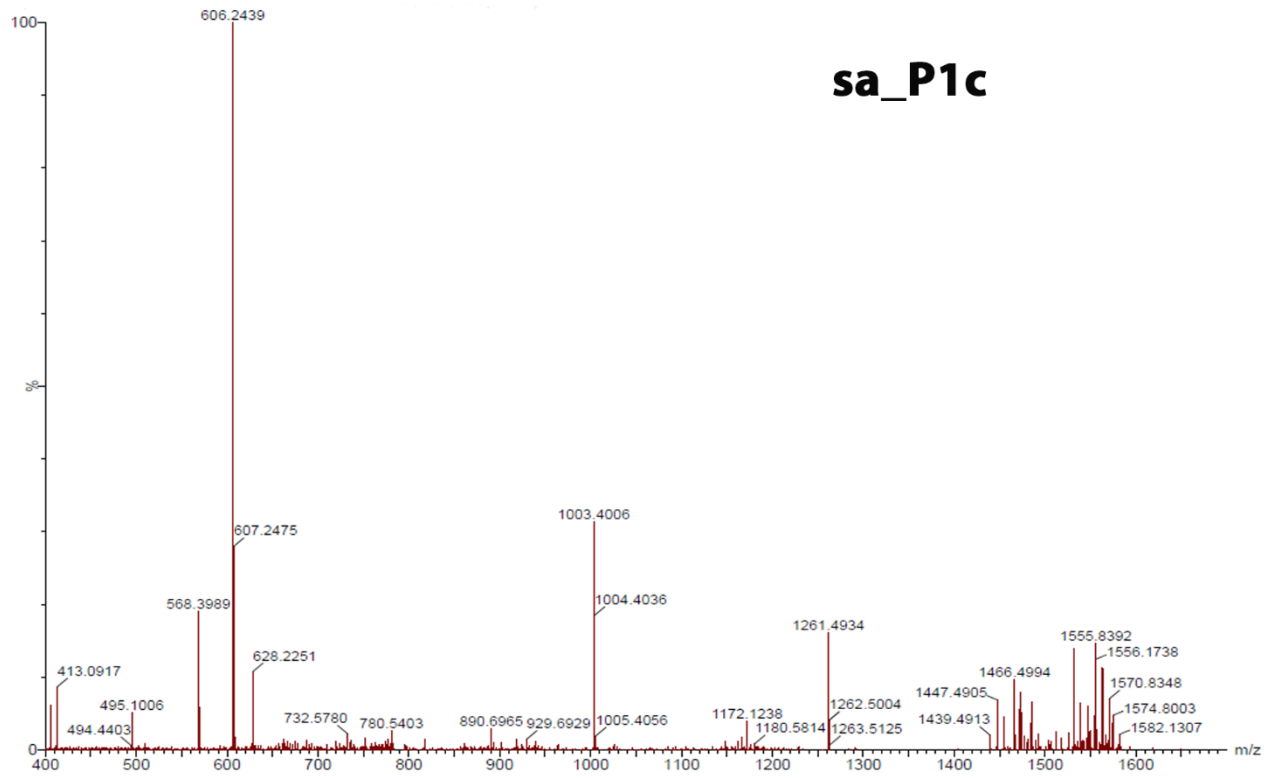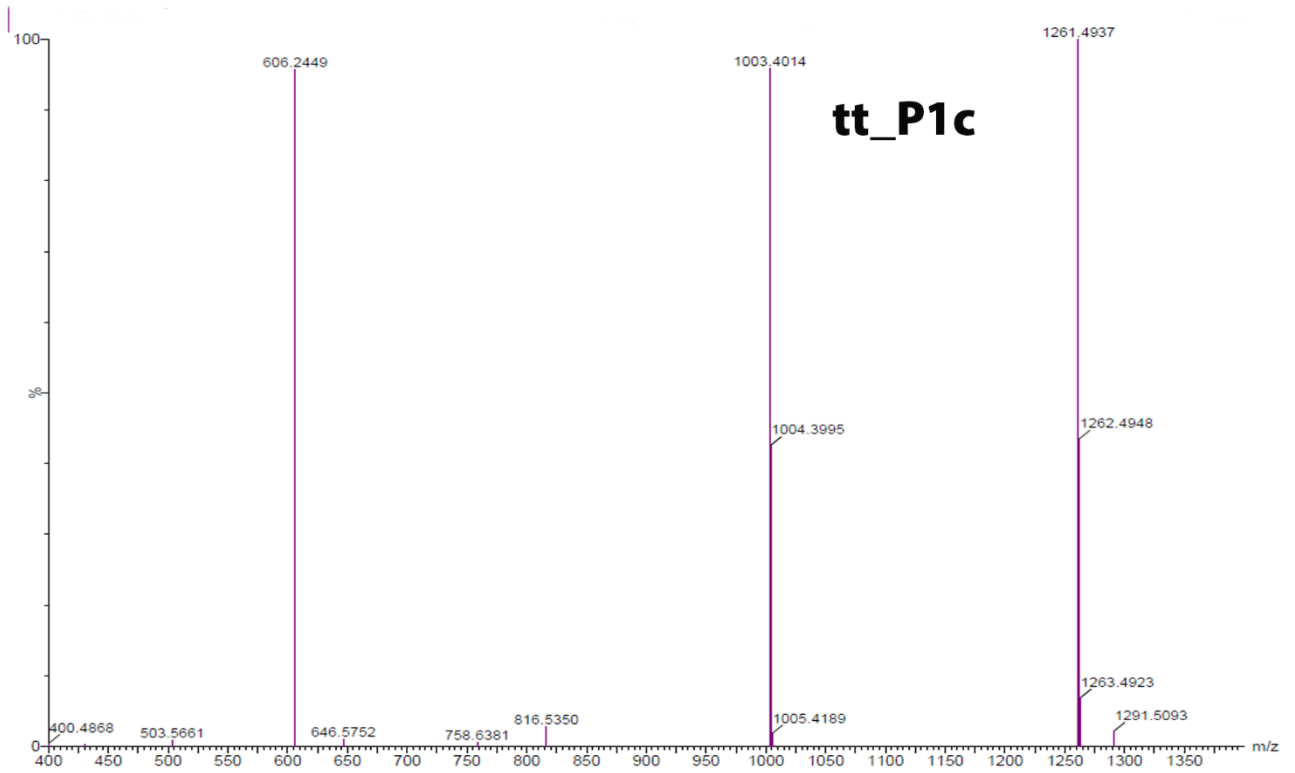

Figure S10: UPLC chromatograms of 50S, ef\_P1c, tt\_P1, sa\_P1c, tt\_A1P1, tt\_P1c

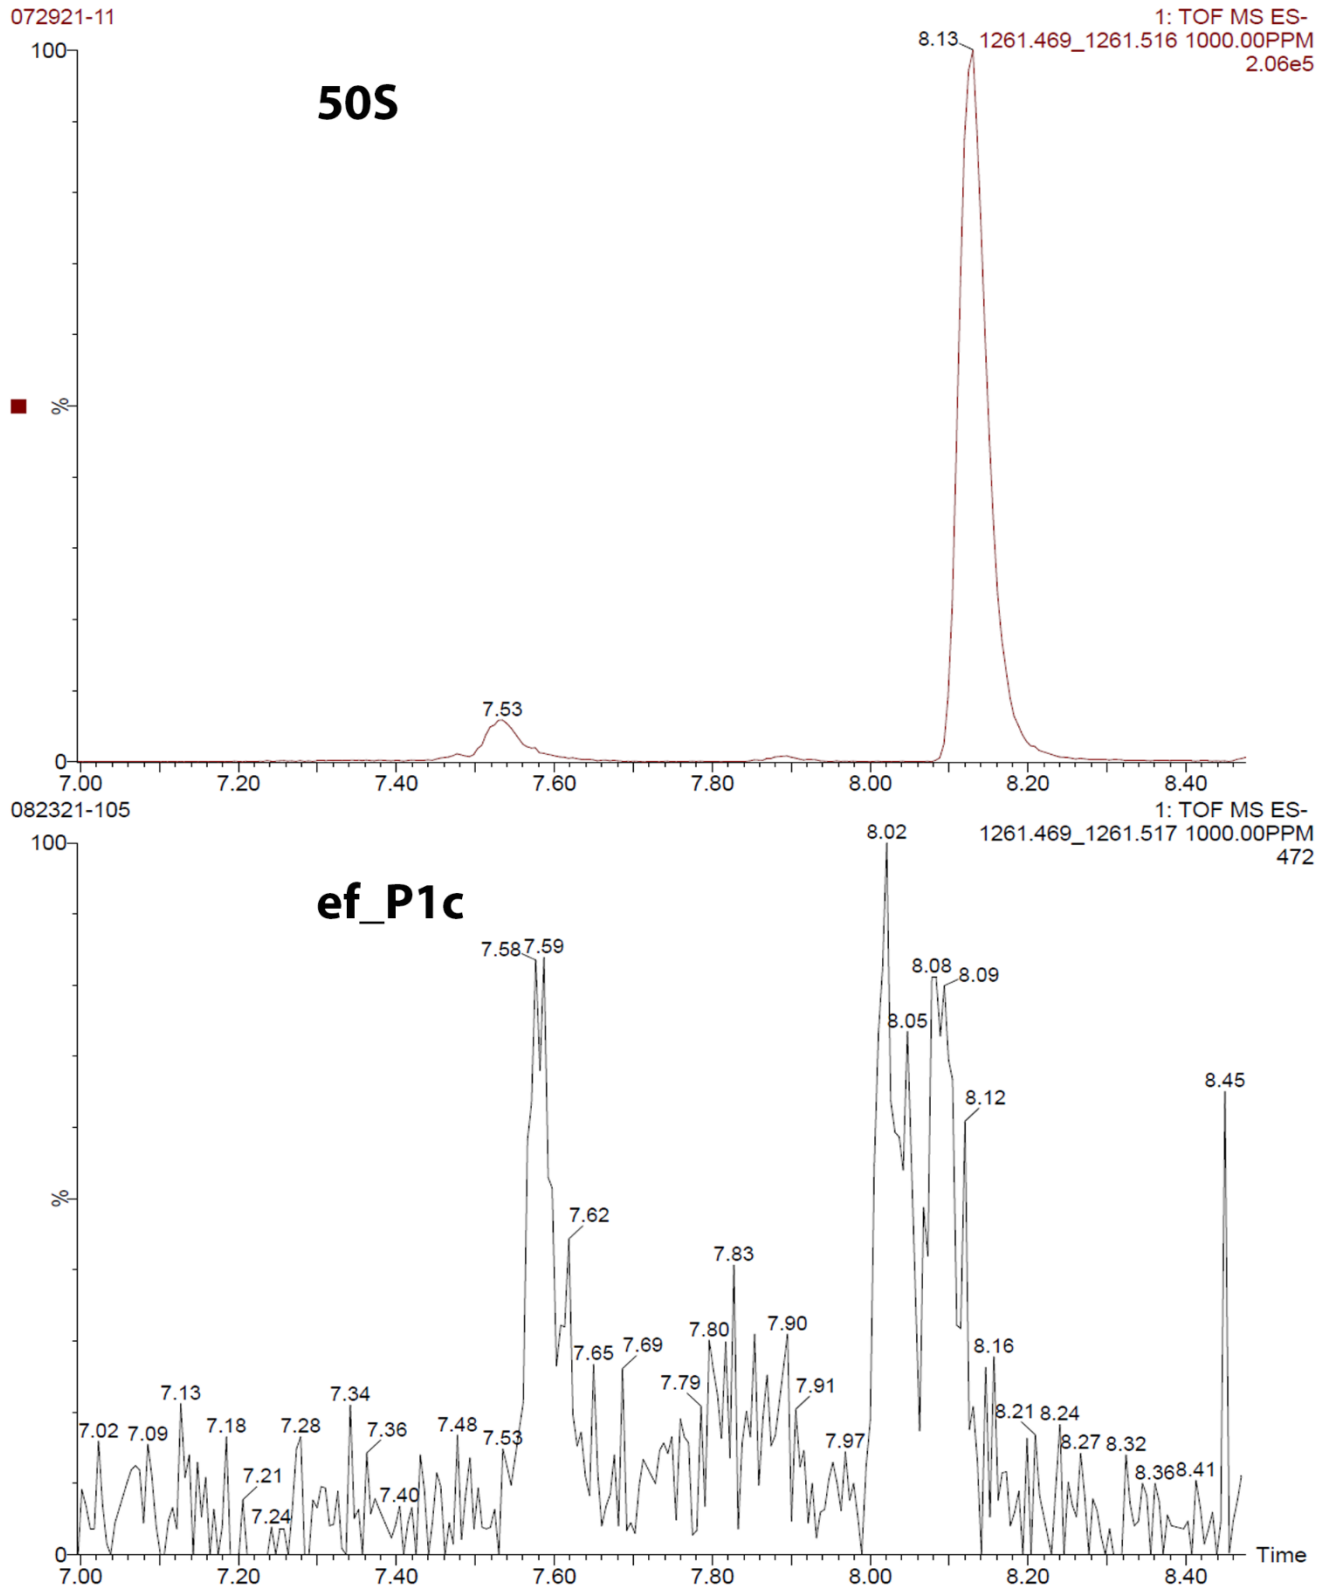

081621-101

# tt\_P1

1: TOF MS ES-  
1261.469\_1261.517 1000.00PPM  
435

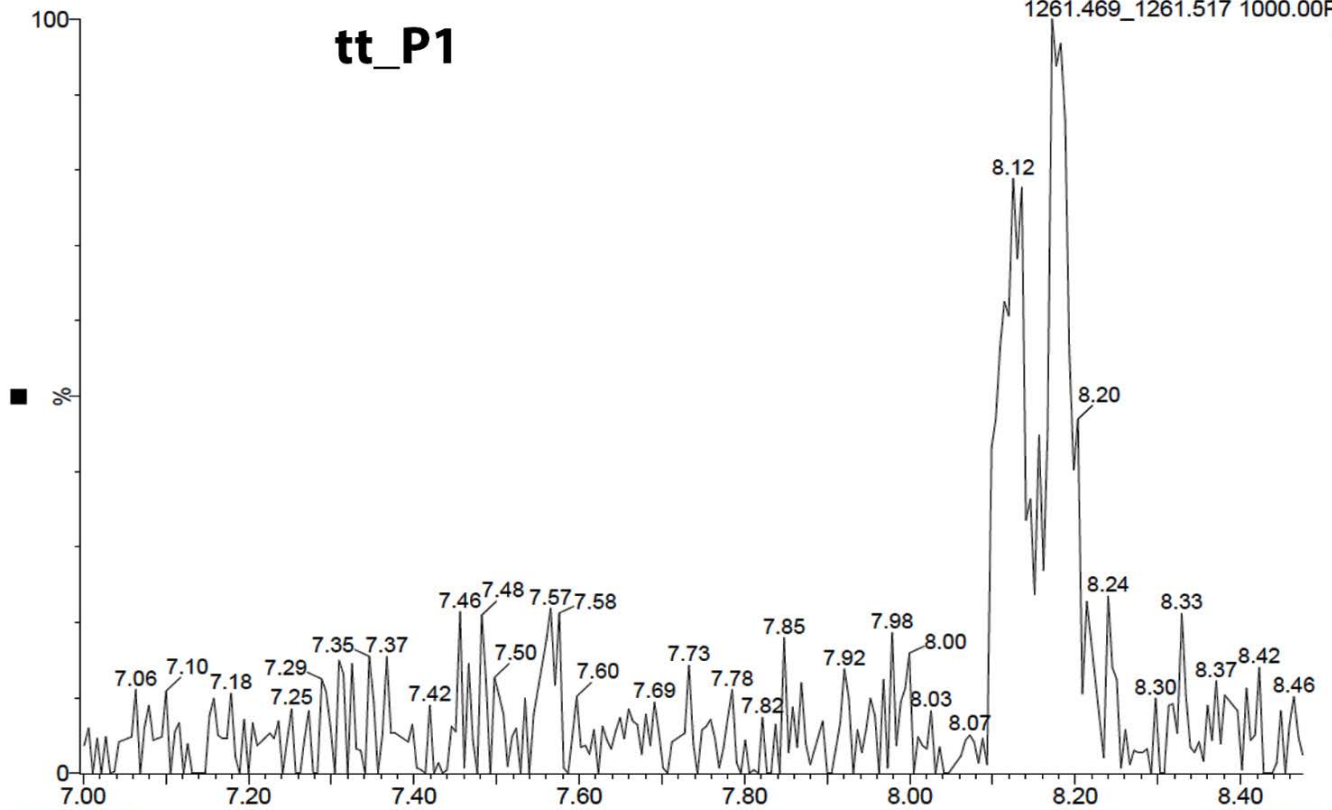

082621-102

# sa\_P1c

1: TOF MS ES-  
1261.469\_1261.517 1000.00PPM  
522

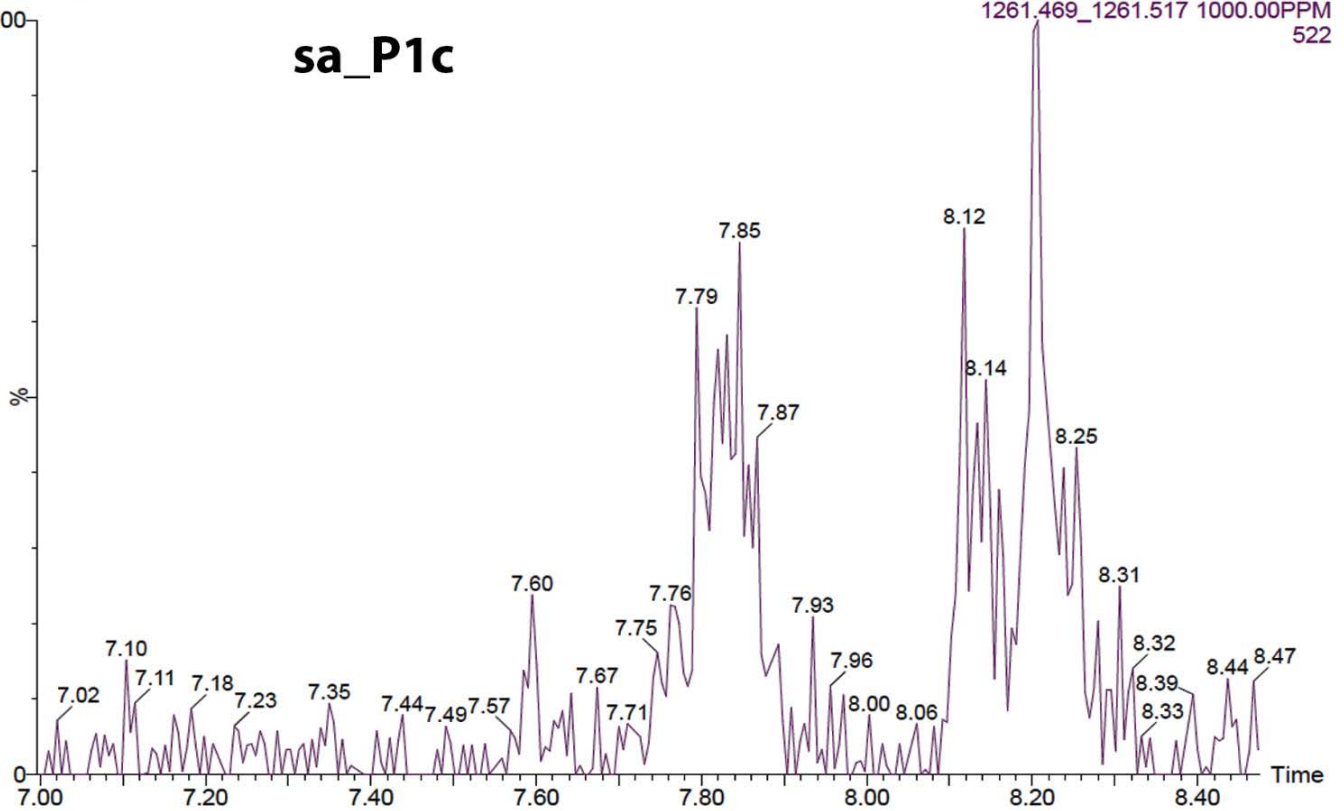

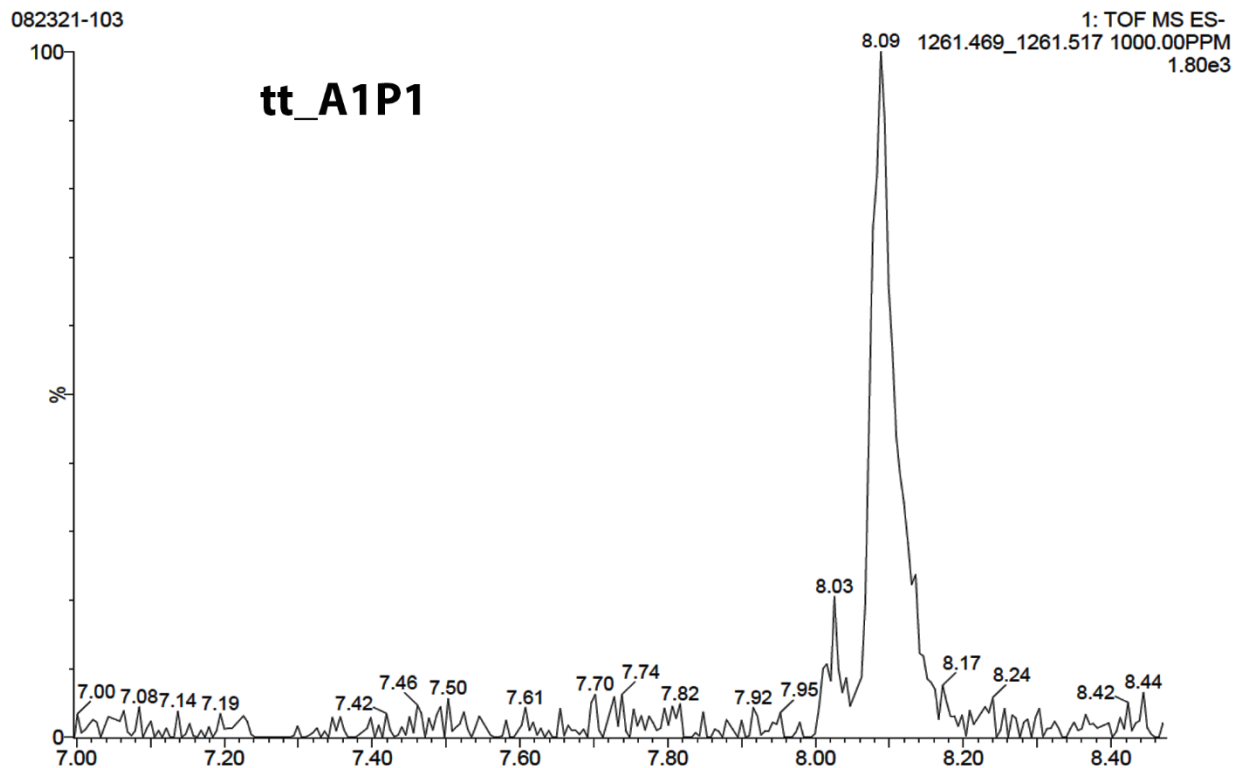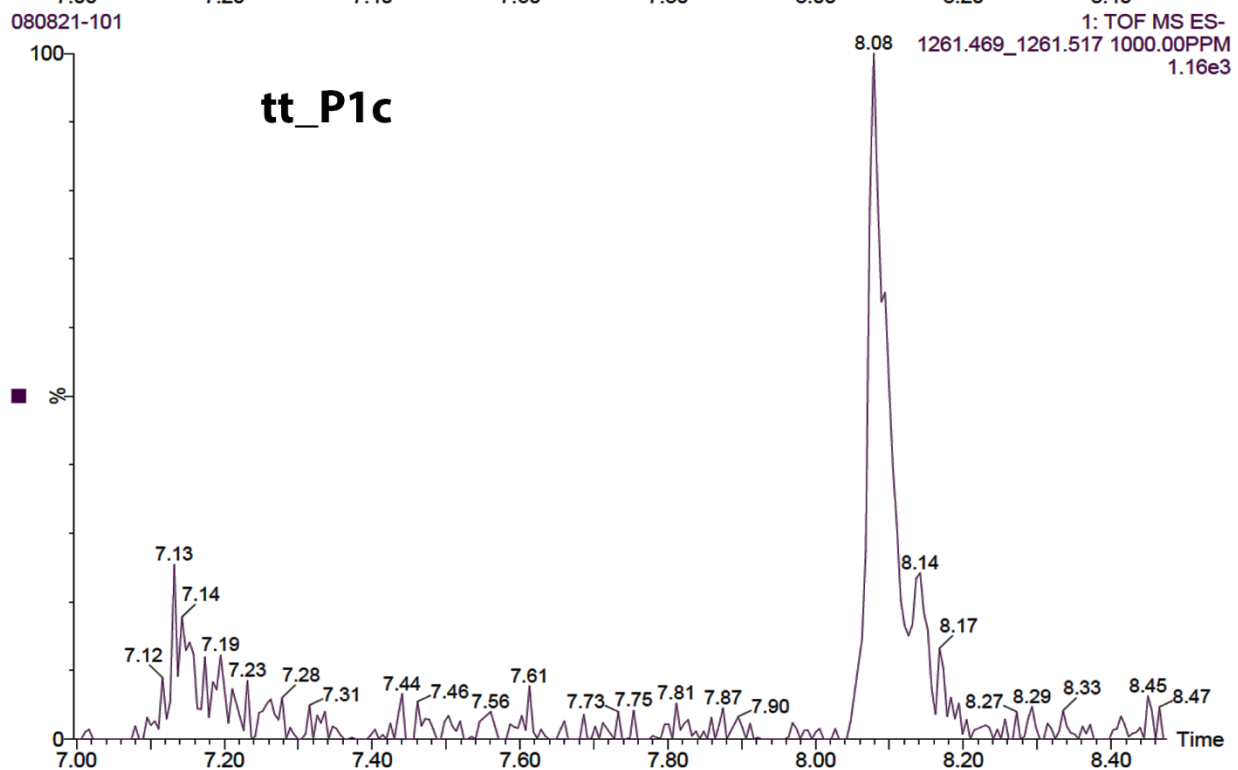

**Figure S11: Verification of the product identity; presence of a peptide bond. A. Schematic representation of the product basic hydrolysis. B. MALDI spectra of the reaction mixture of construct tt\_P1c before and after base treatment.**

**A**

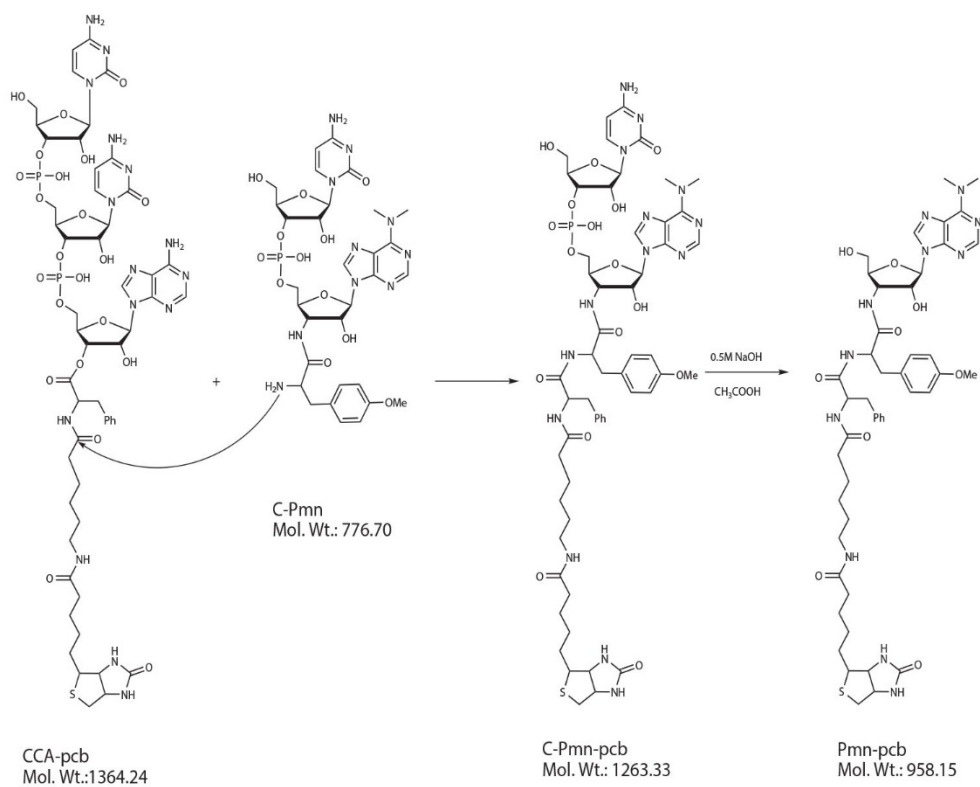

**B**

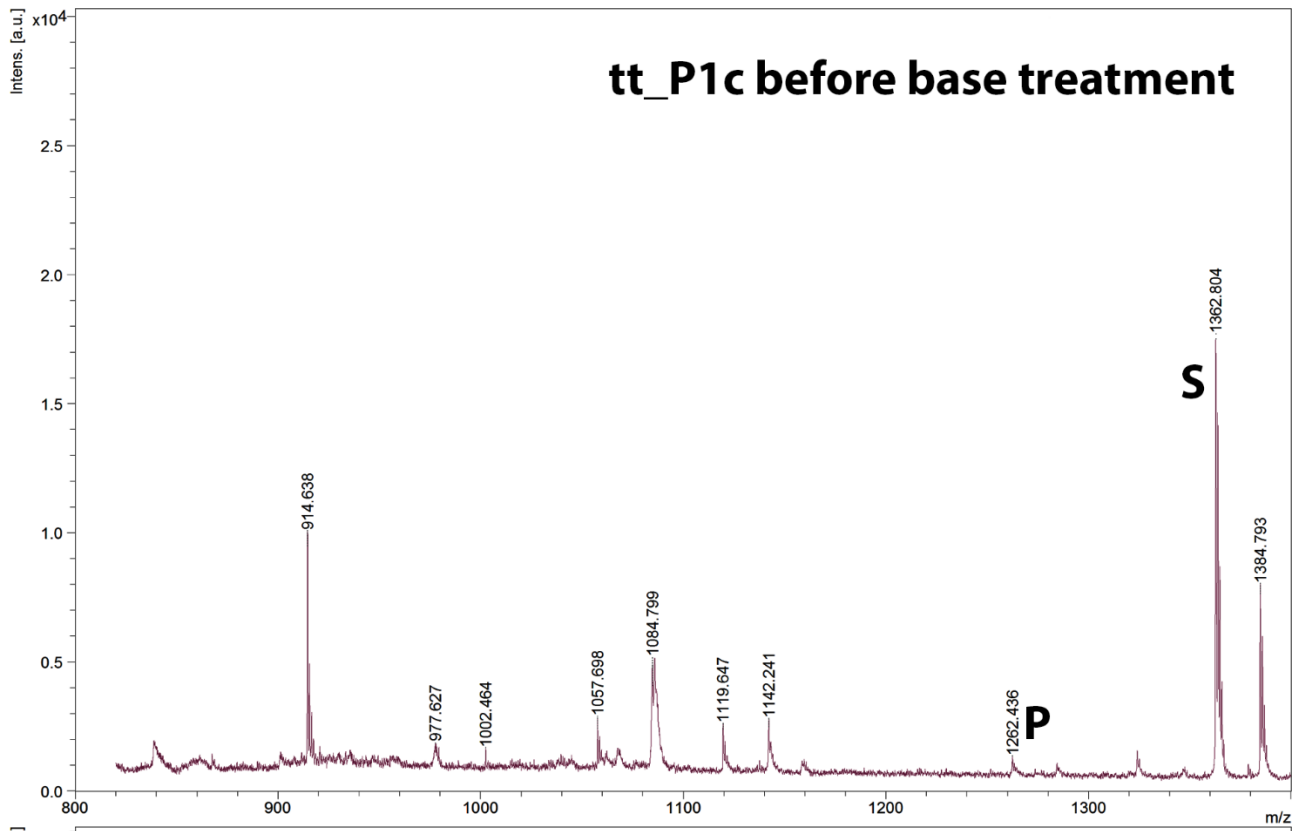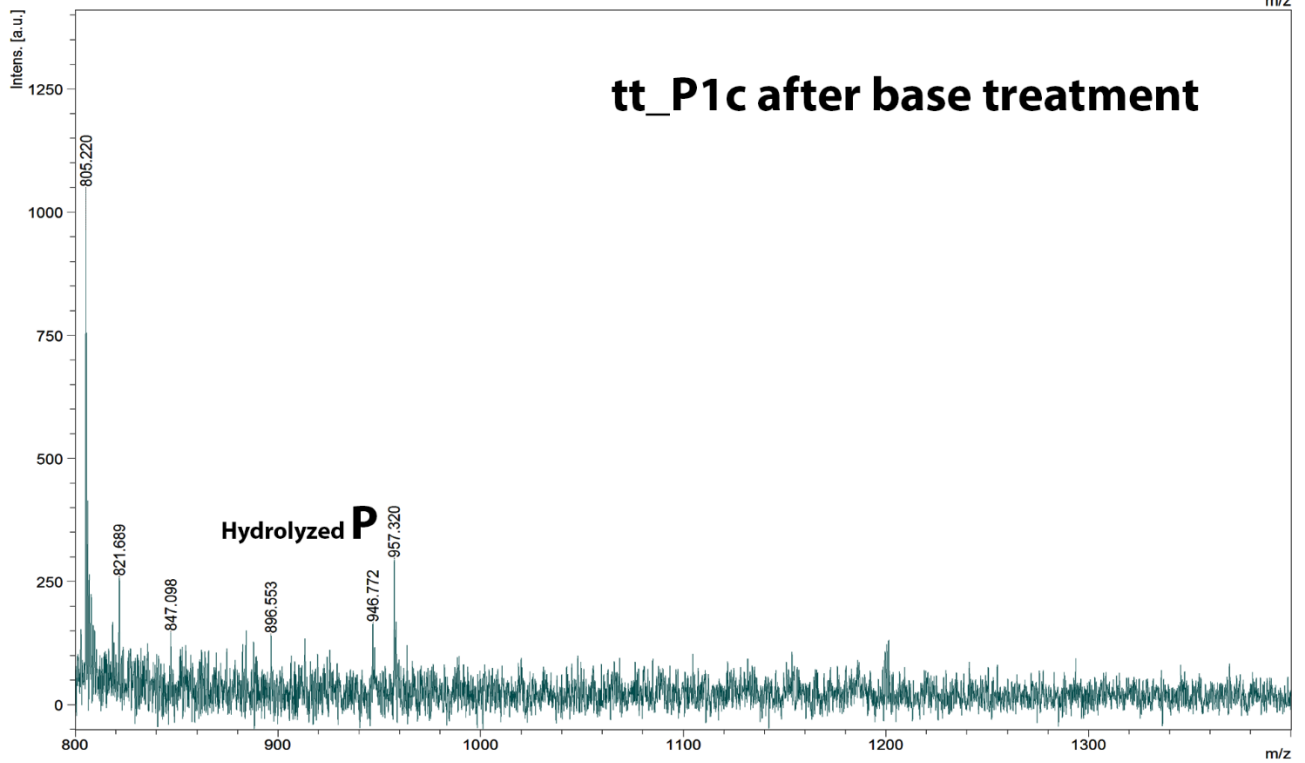

Figure S12: MALDI spectra of the fragment reaction for various time durations A. tt\_P1c B. 50S.

A

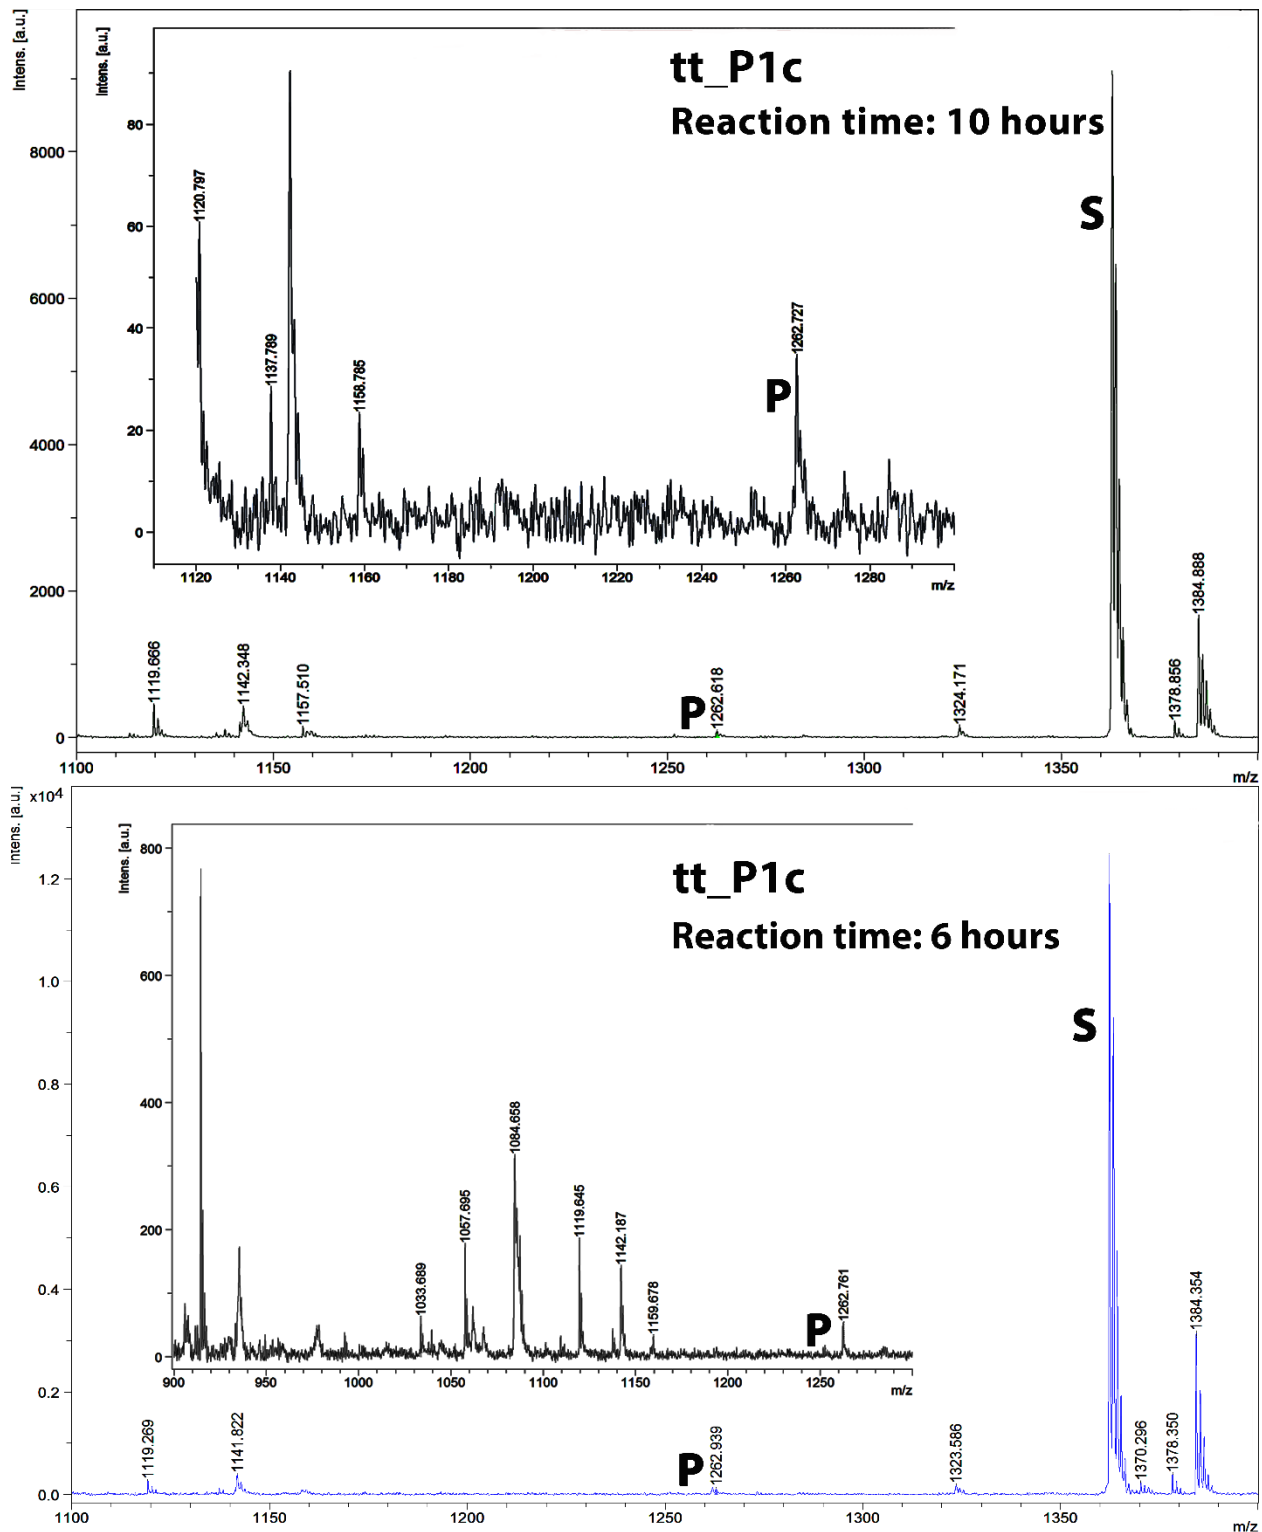



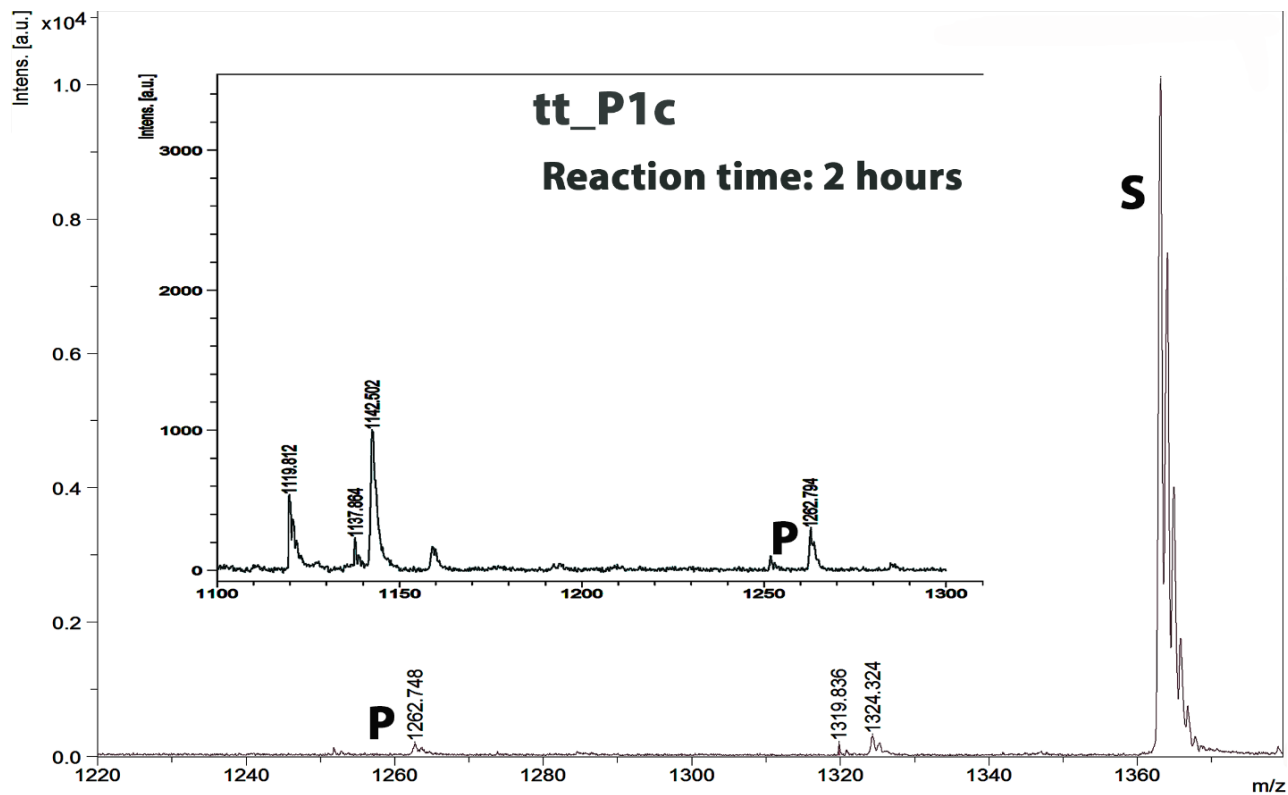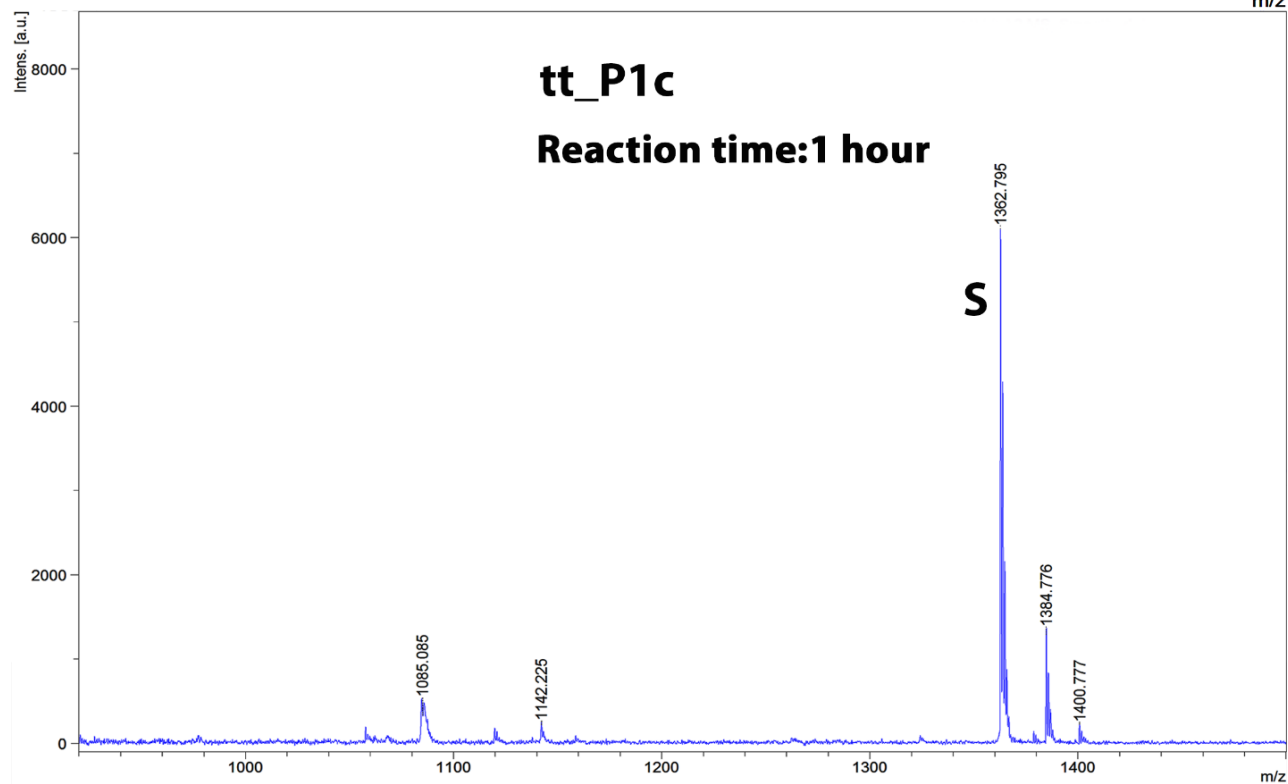

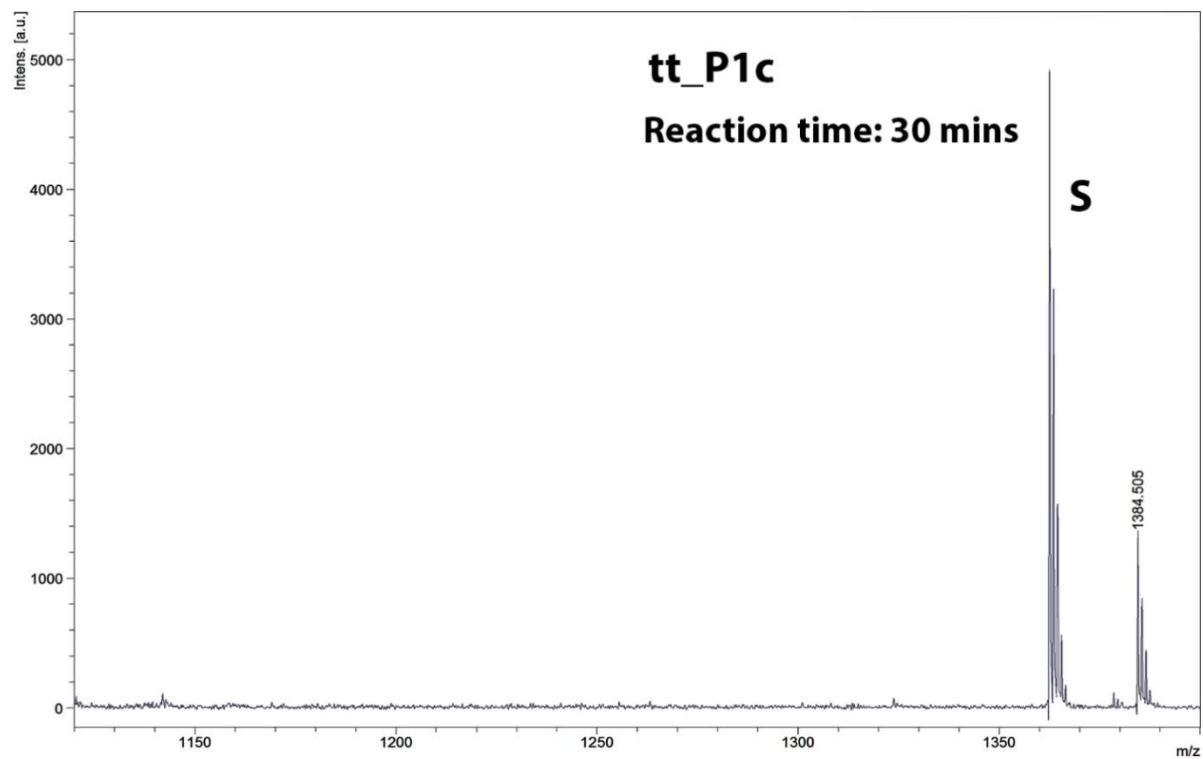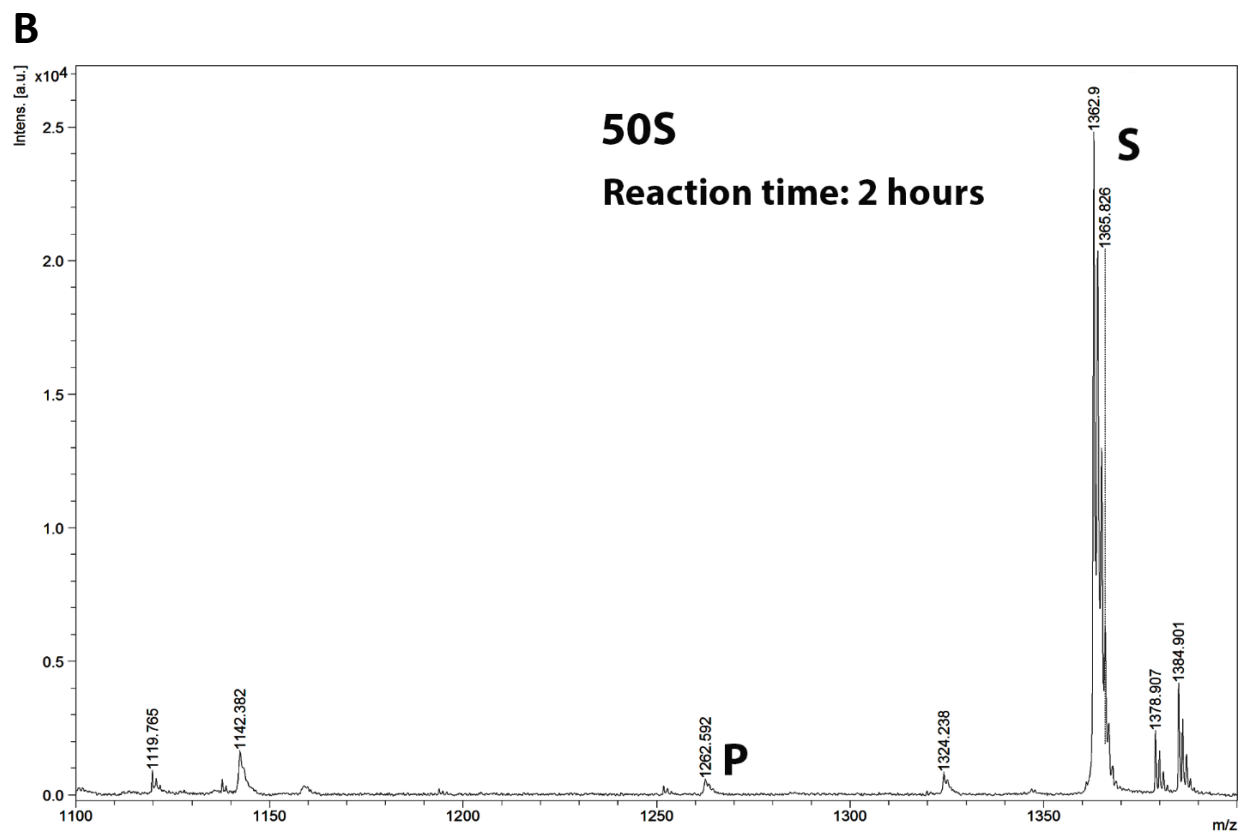

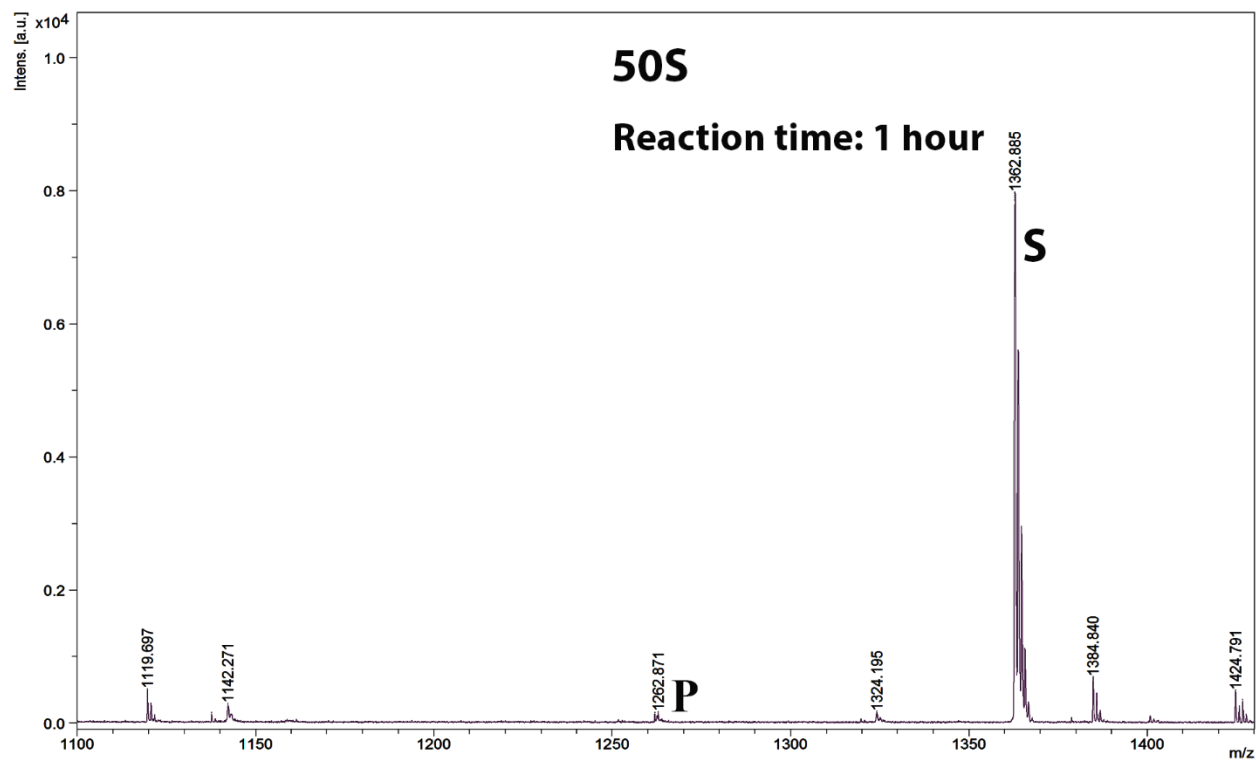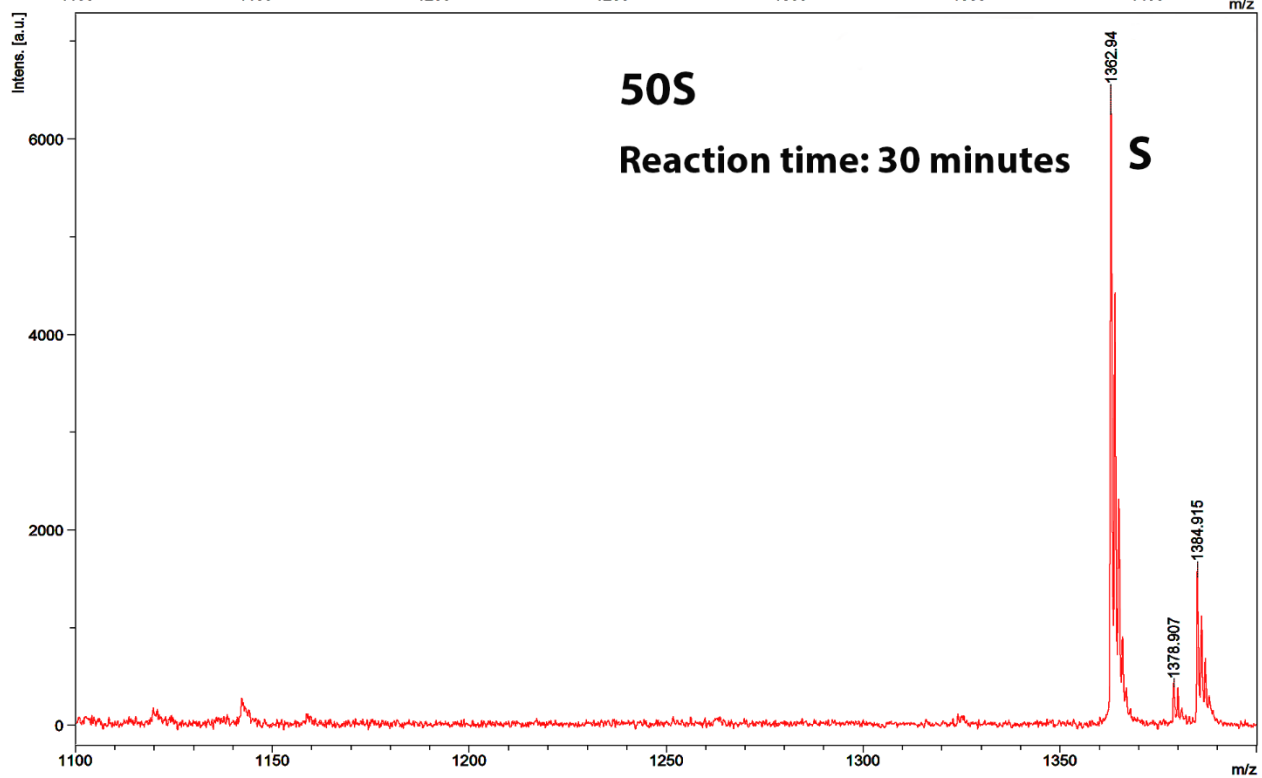

Figure S13: MALDI spectra of fragment reactions using 10, 20, 30, 40, 50 and 100  $\mu\text{M}$  concentration of construct tt\_P1c.

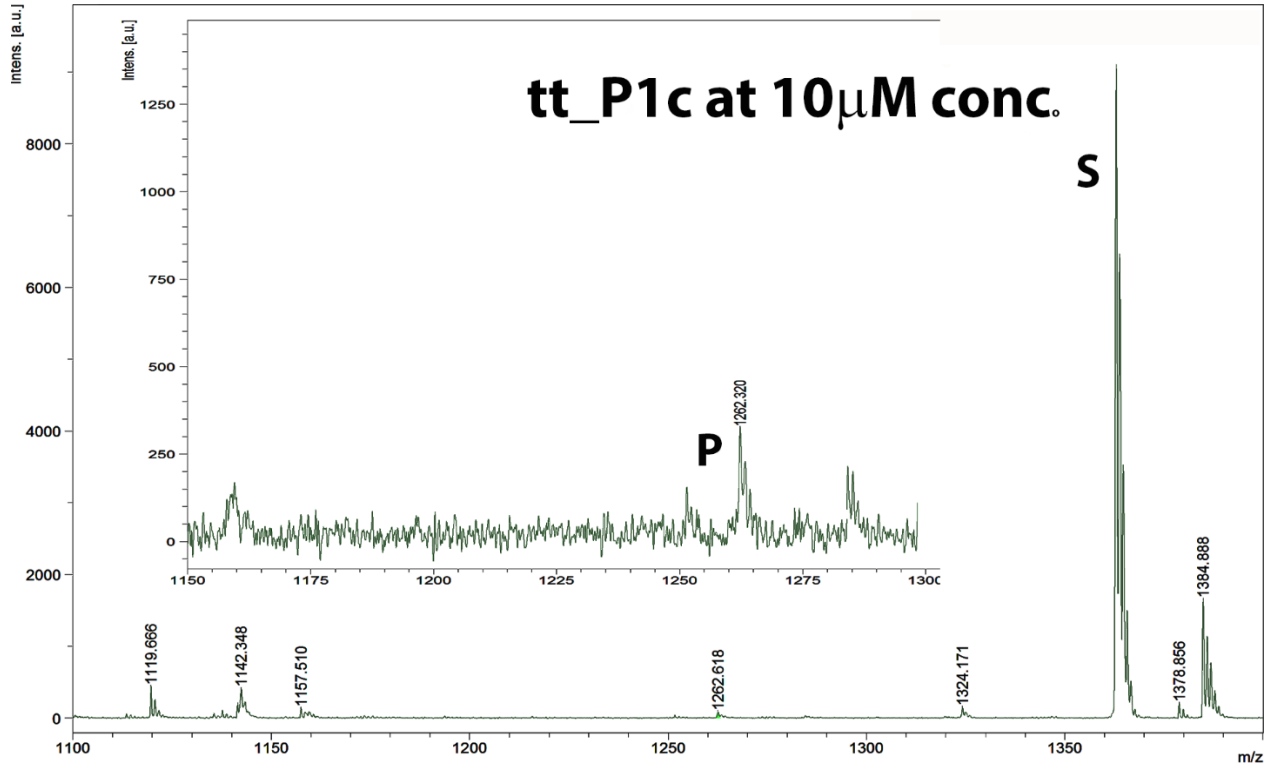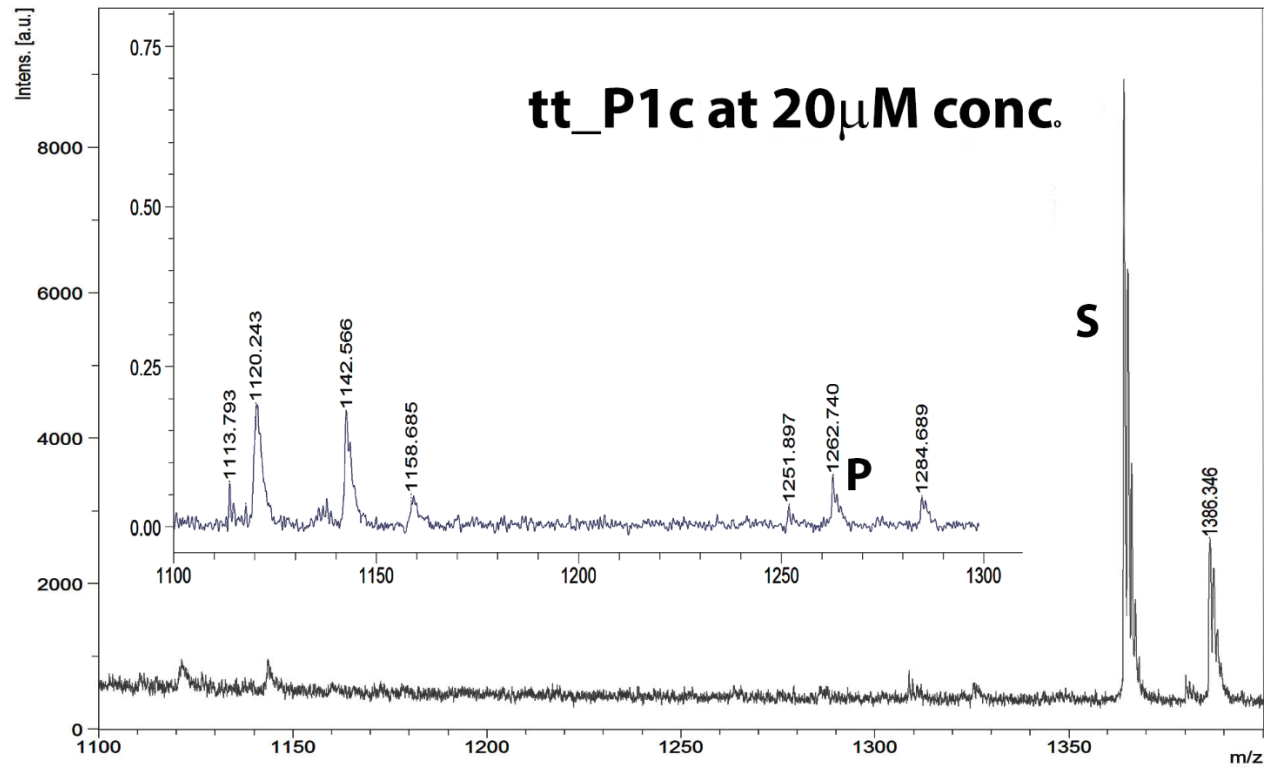

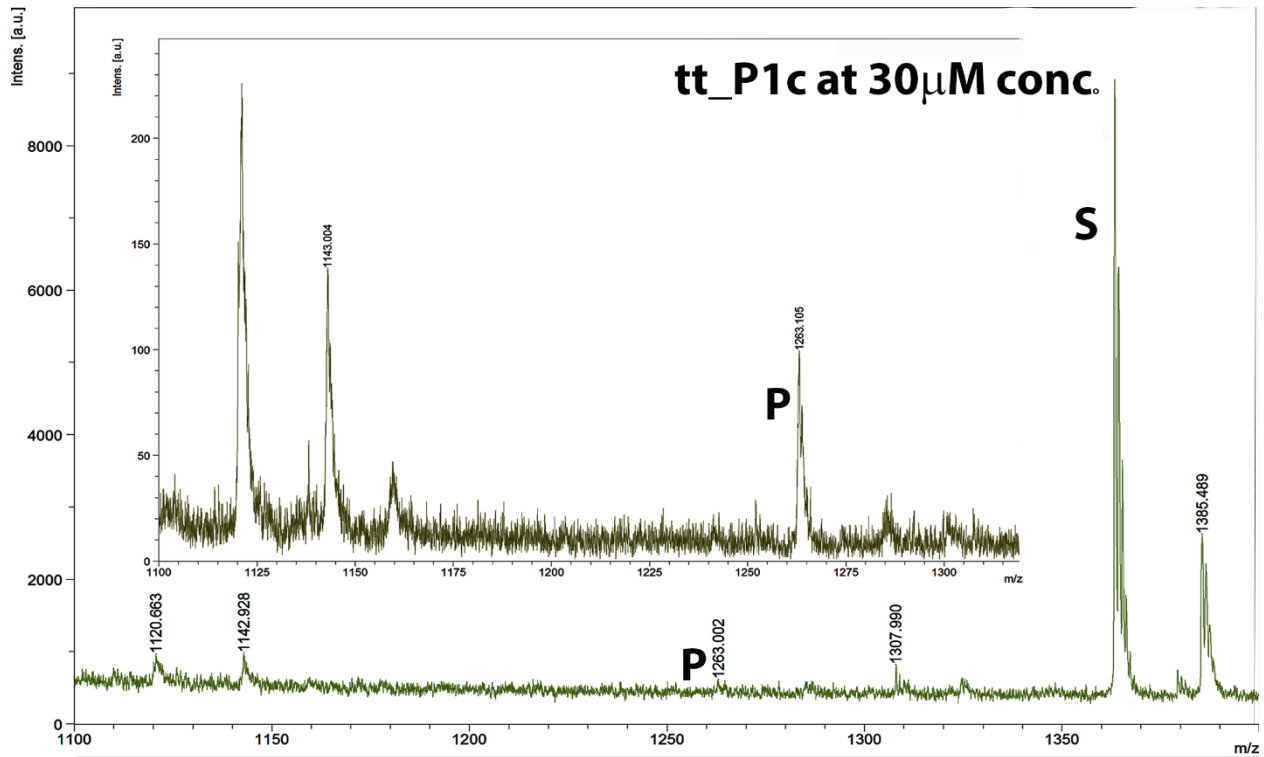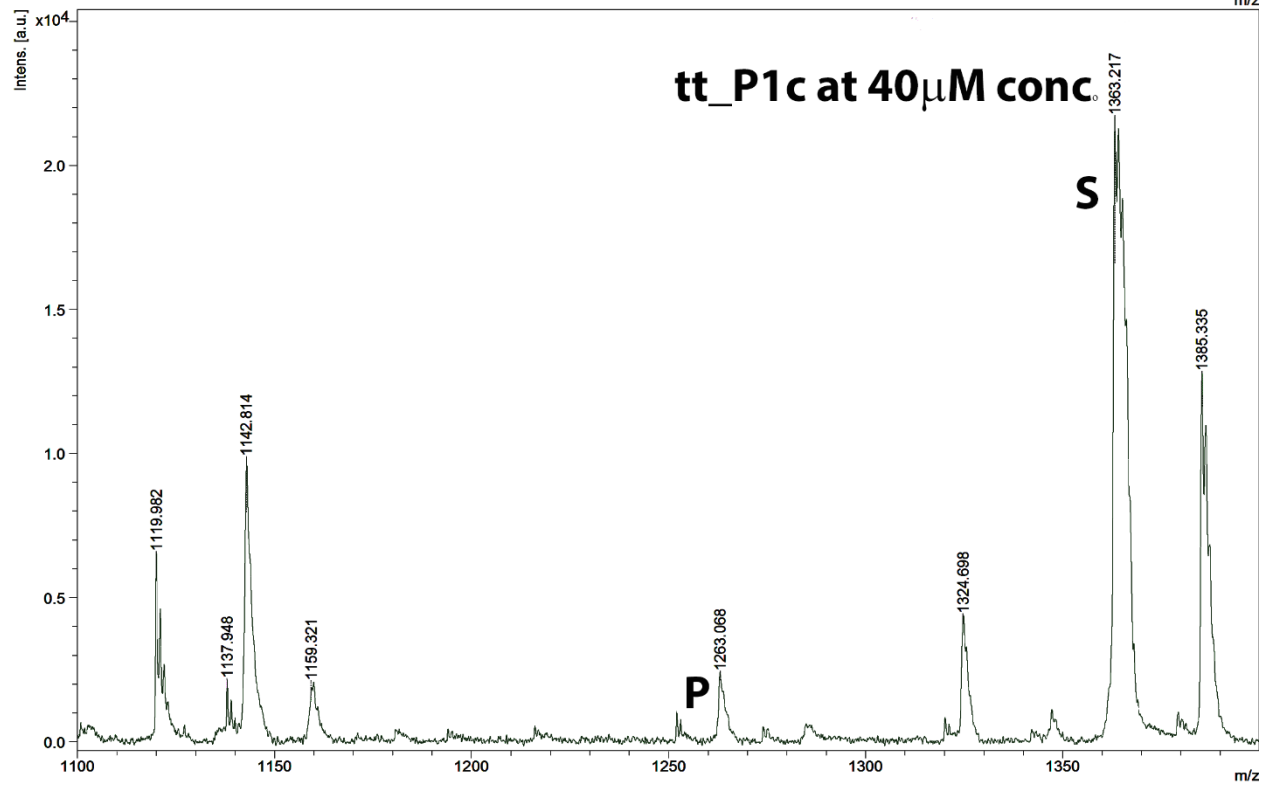

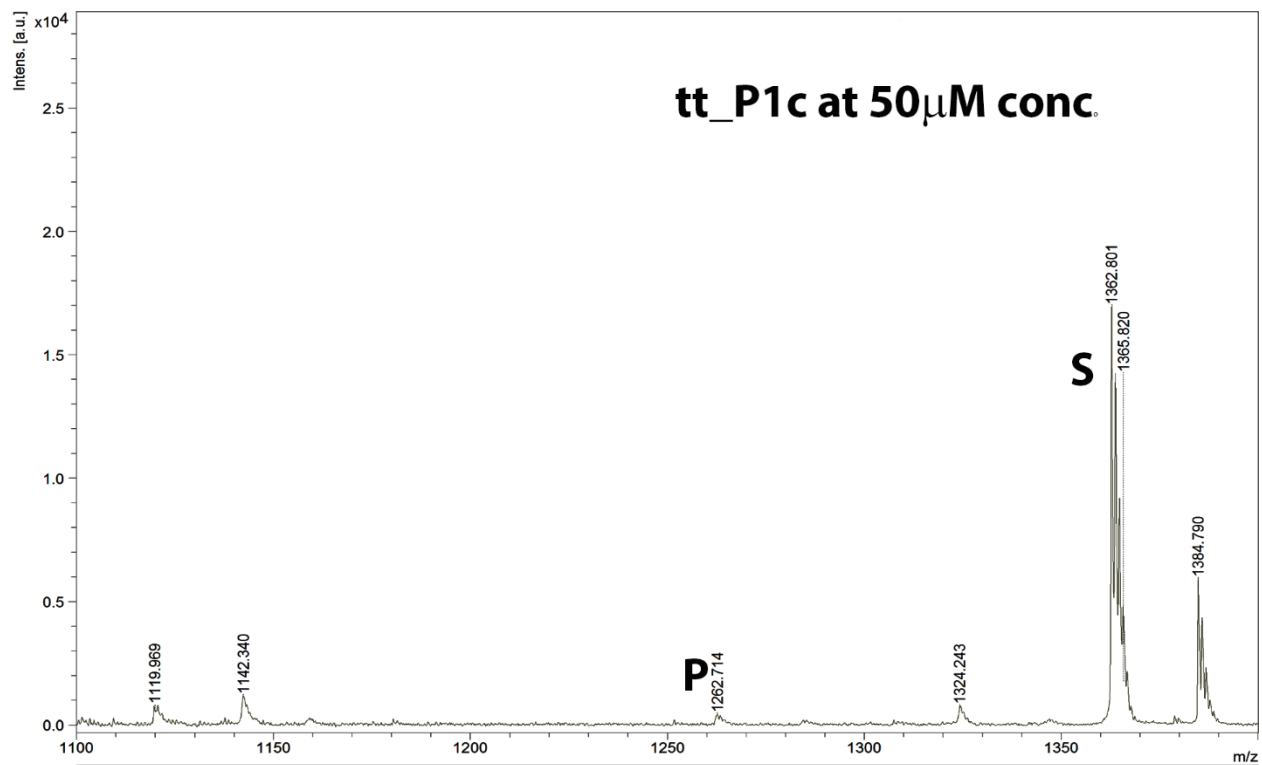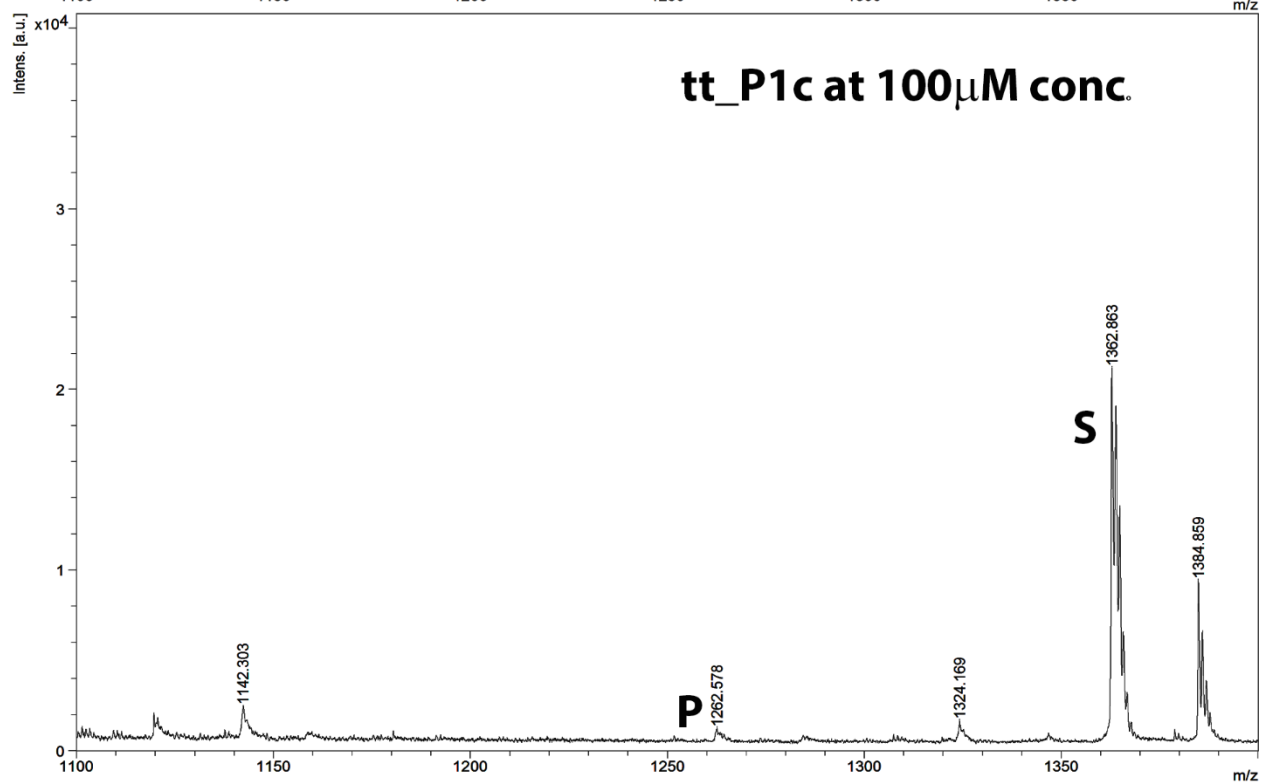

Figure S14: MALDI spectra of the reactions at 2.8  $\mu\text{M}$  concentration of tt\_P1c and different substrate concentrations.

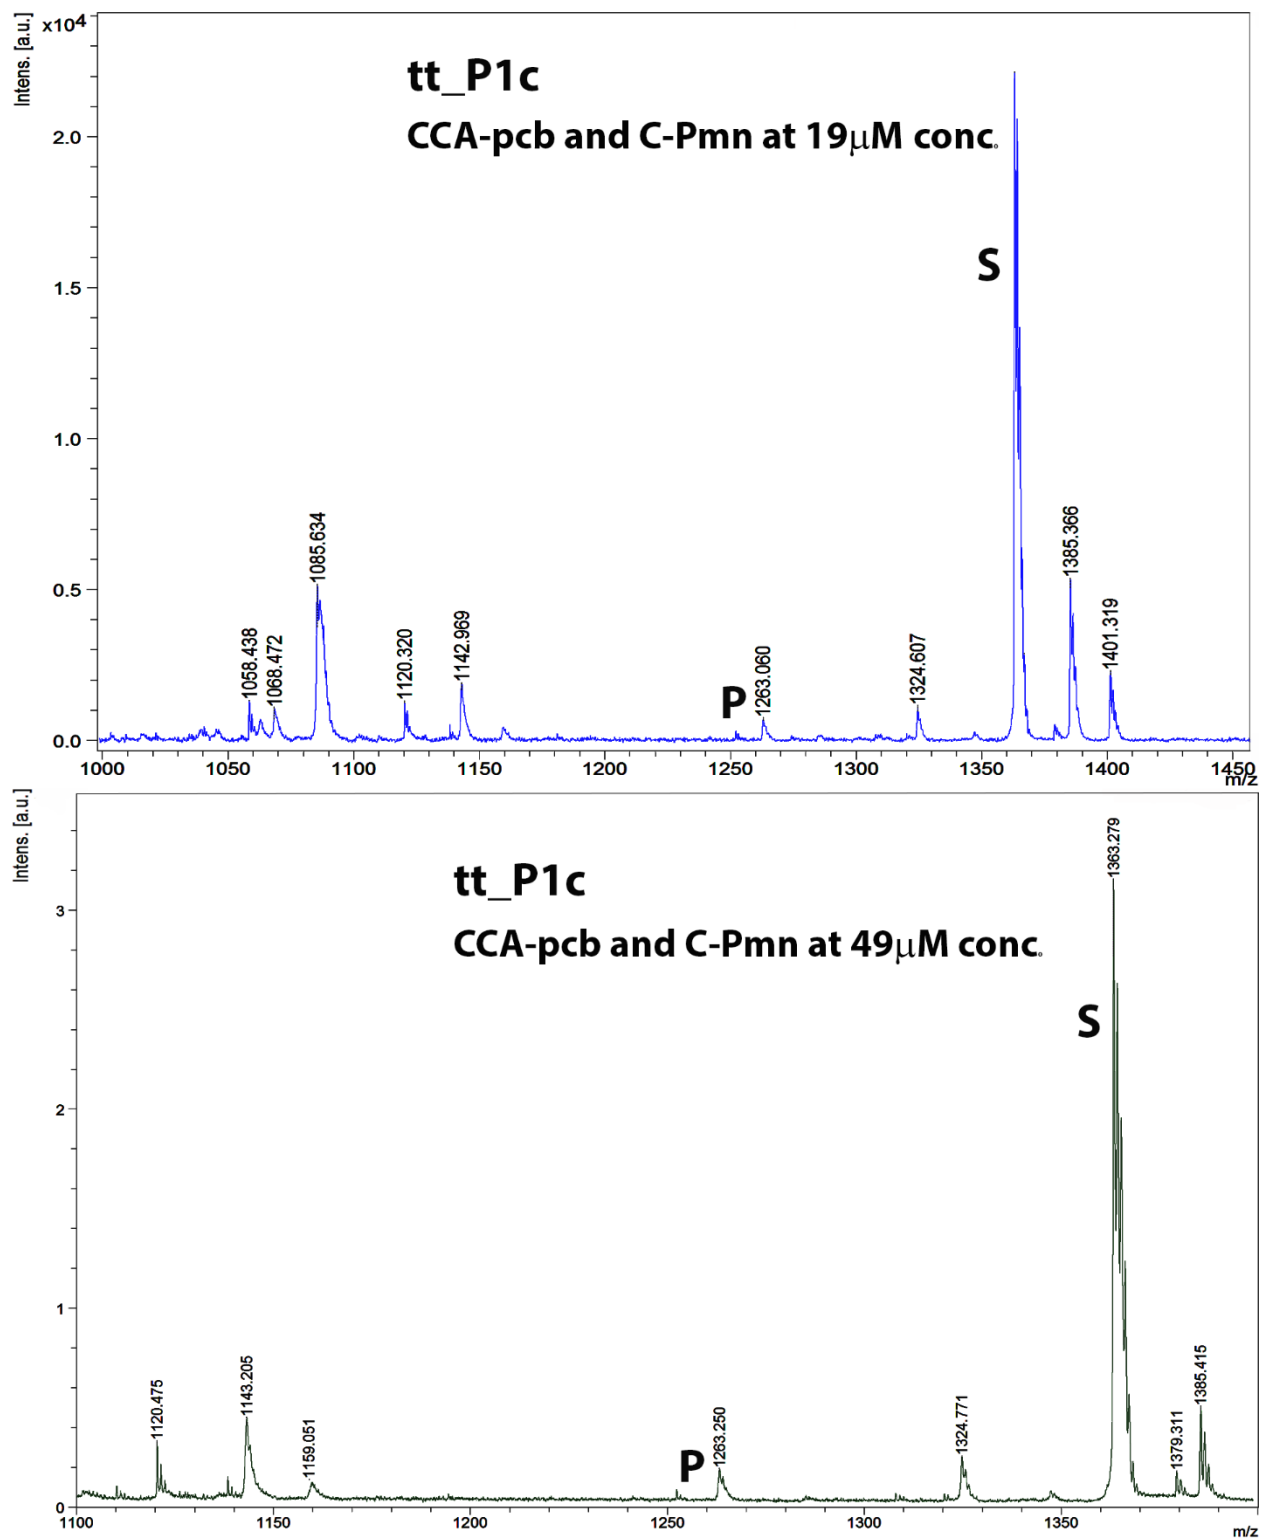

**Figure S15: MALDI spectra of the reaction mixtures at 15°C. A.** Positive control (50S) and the construct tt\_P1c. **B.** The constructs tt\_P1, tt\_A1P1. **C.** The constructs ef\_P1c and sa\_P1c.

**A**

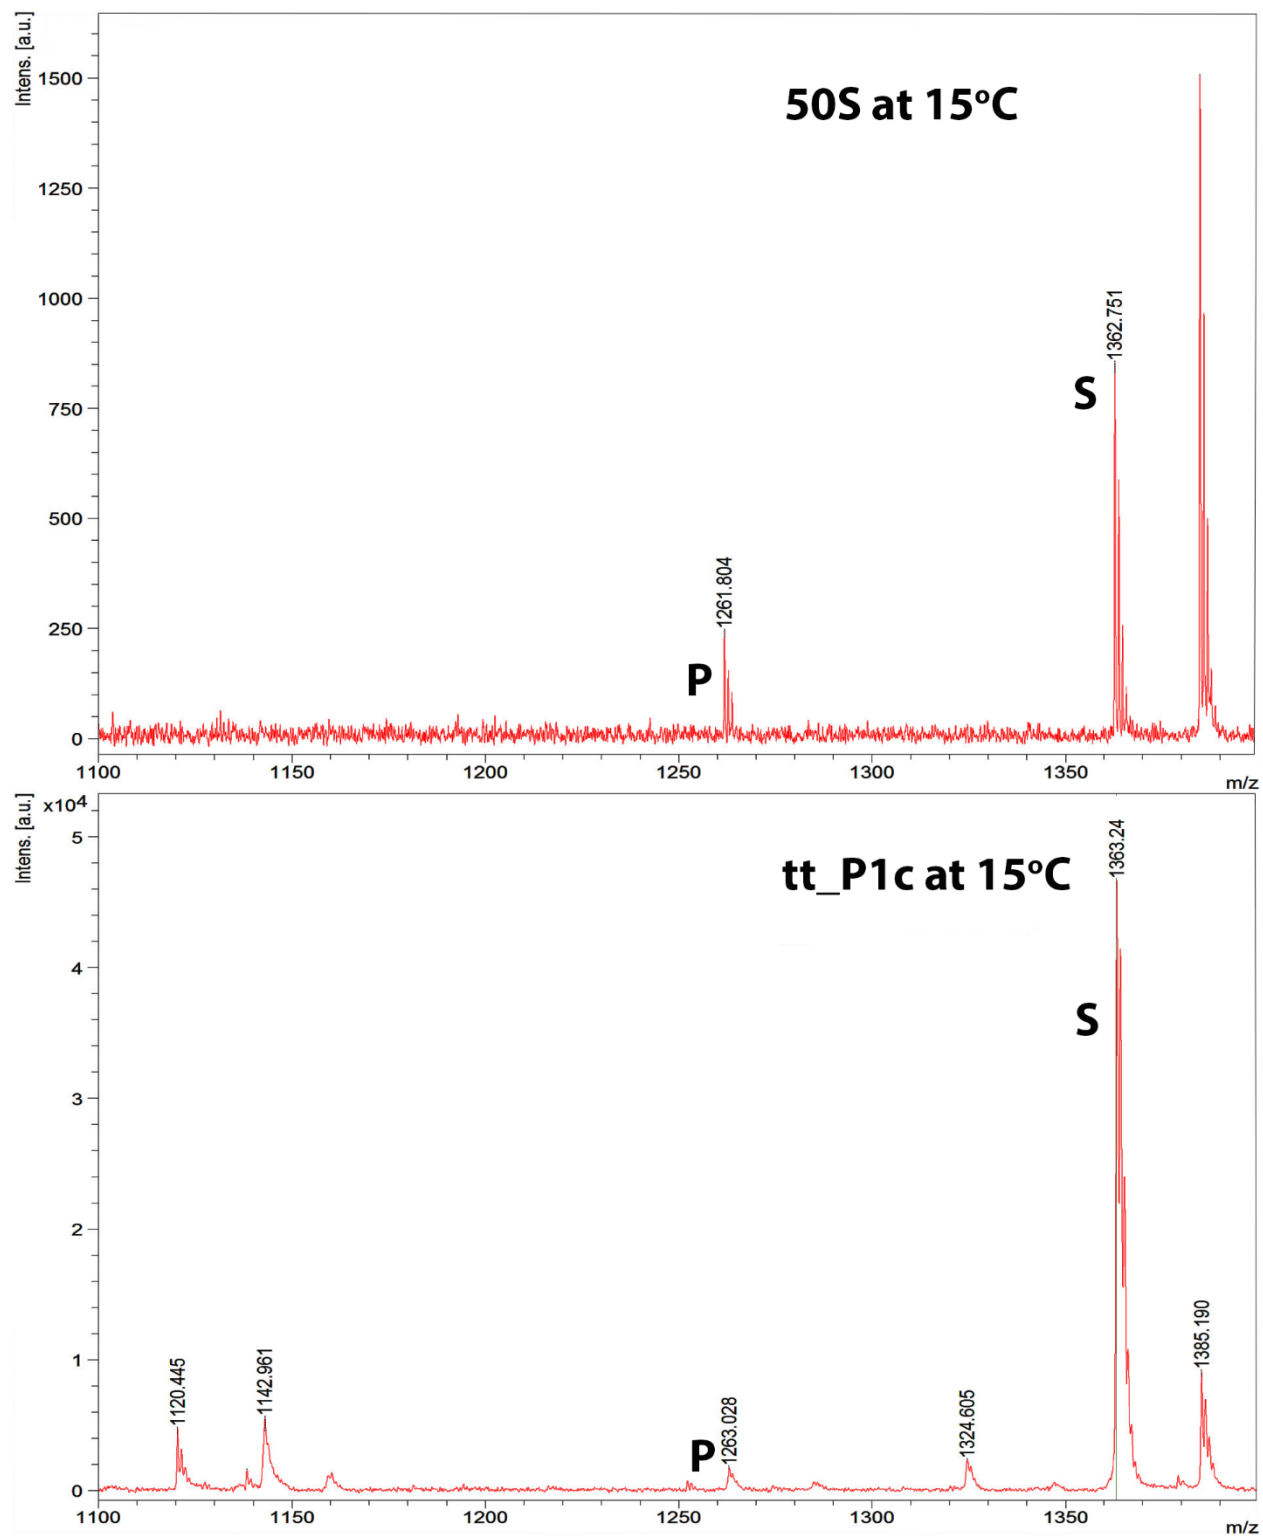



**B**

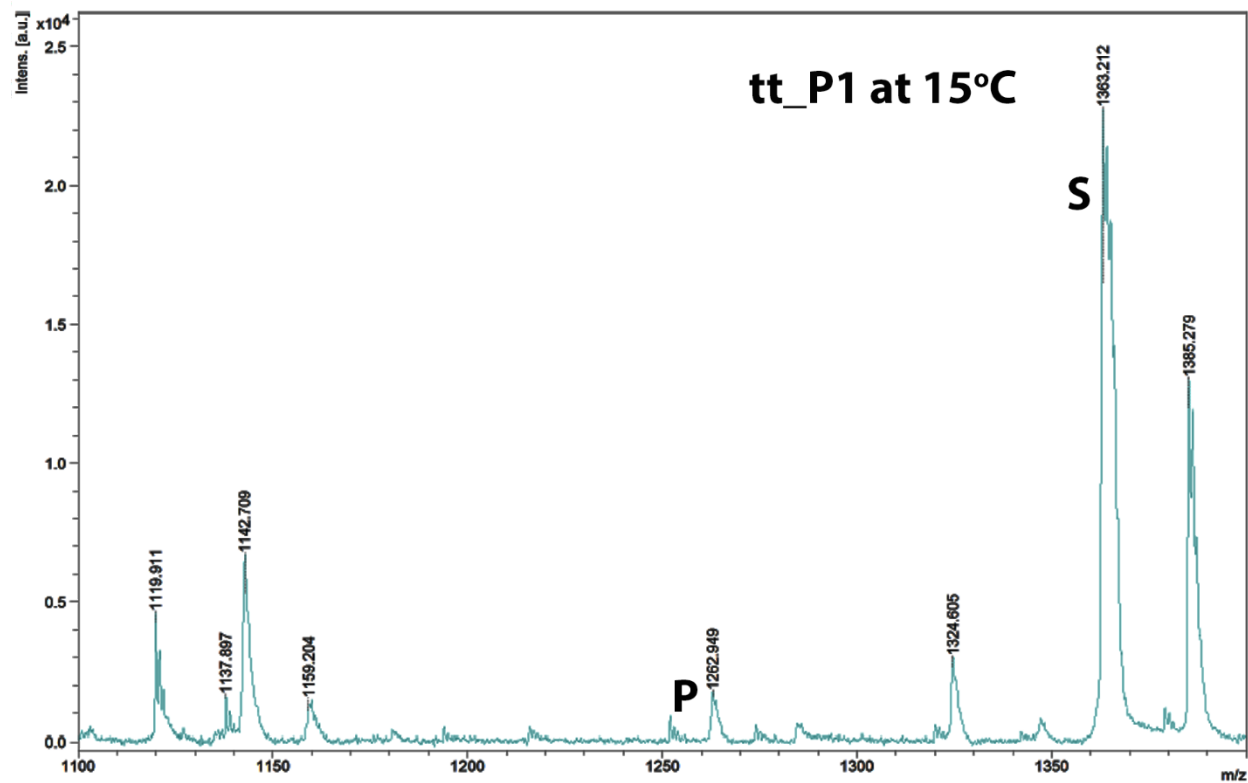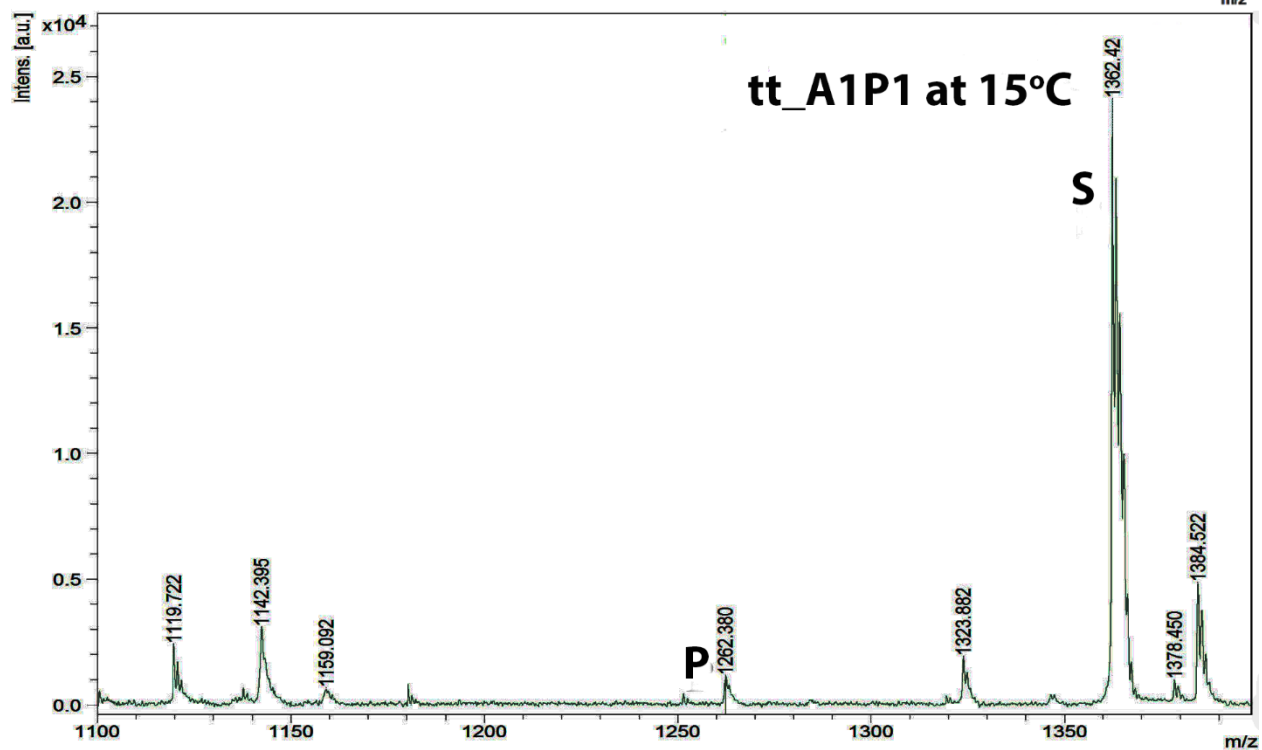

**C**

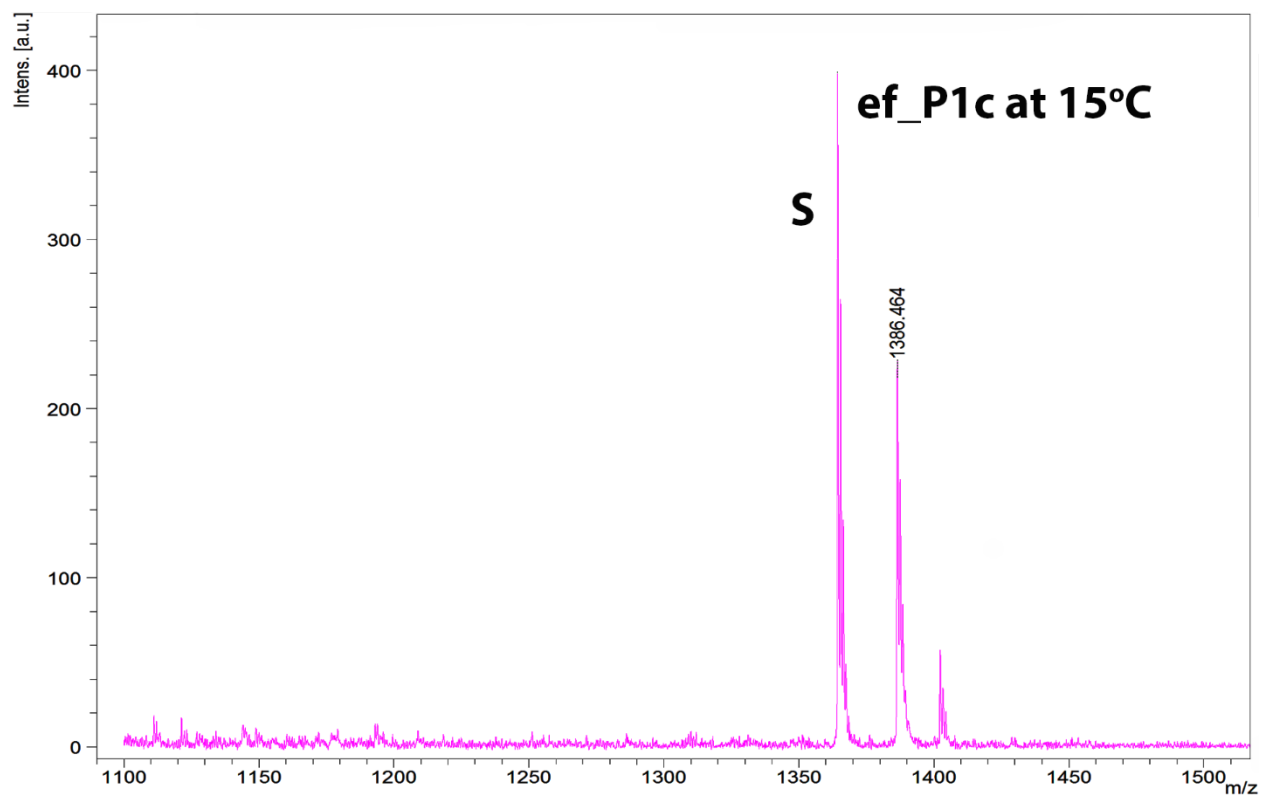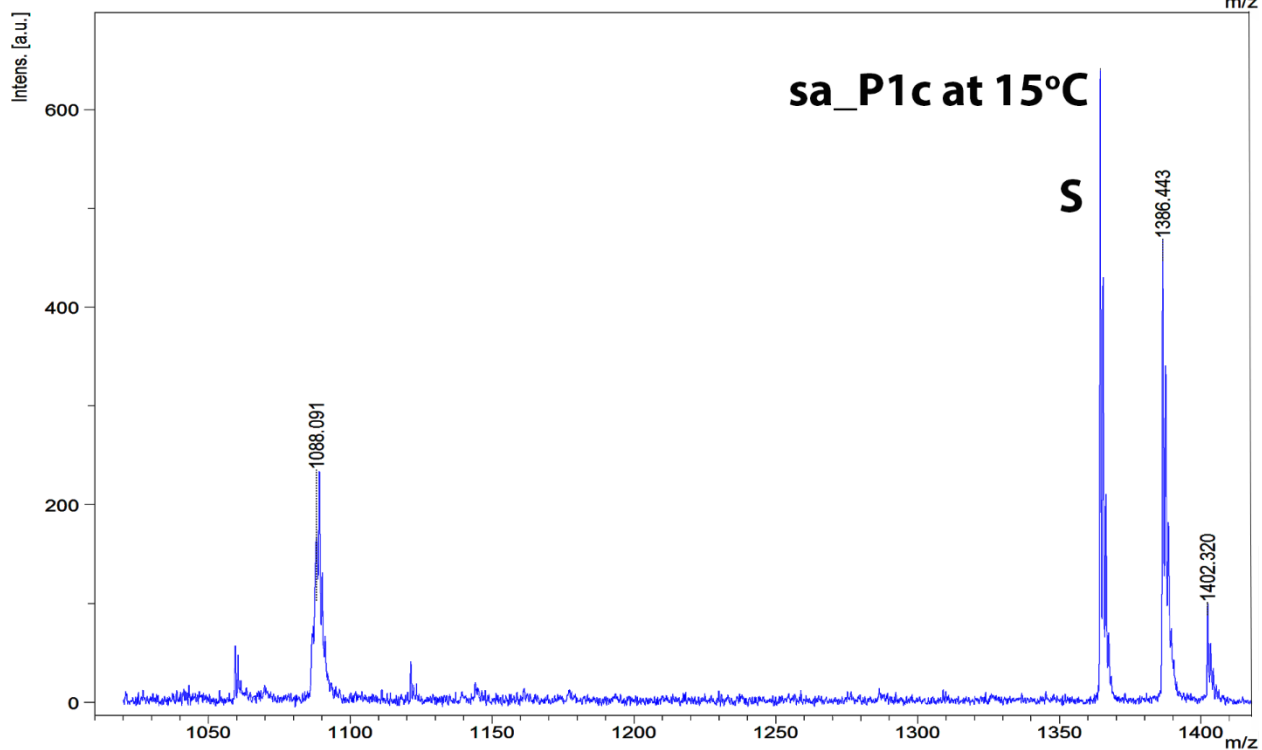

**Figure S16: MALDI spectra of the reaction mixtures at 25°C. A.** Positive control (50S) and the construct tt\_A1P1. **B.** The constructs tt\_P1c and tt\_P1. **C.** The constructs of ef\_P1c and sa\_P1c.

**A**

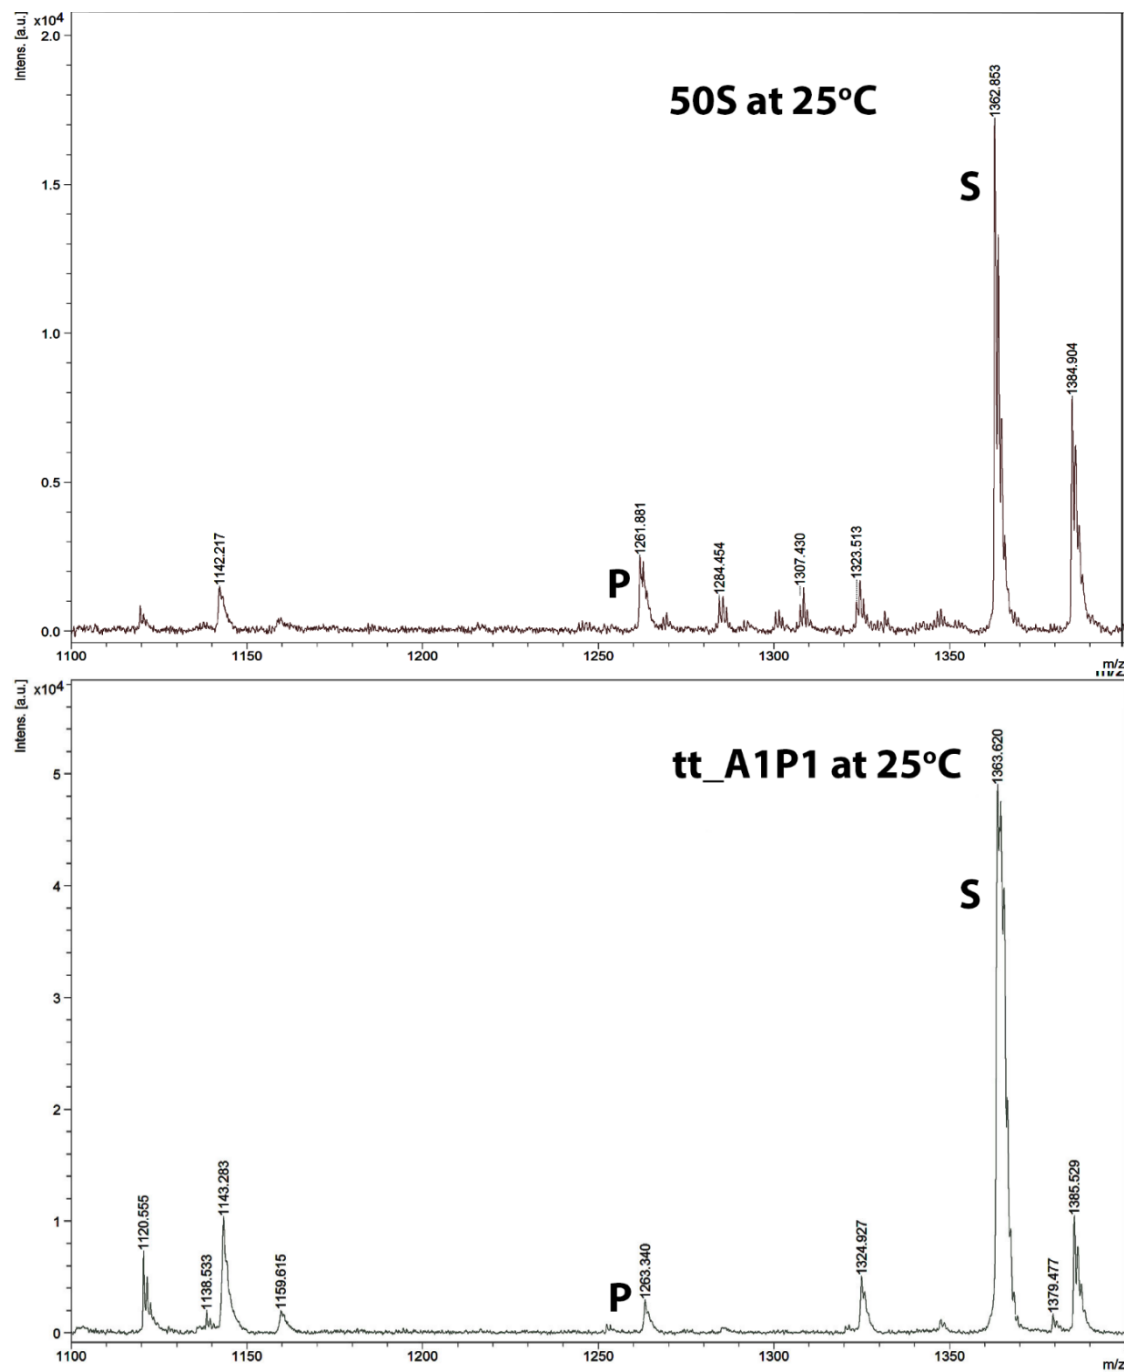

**B**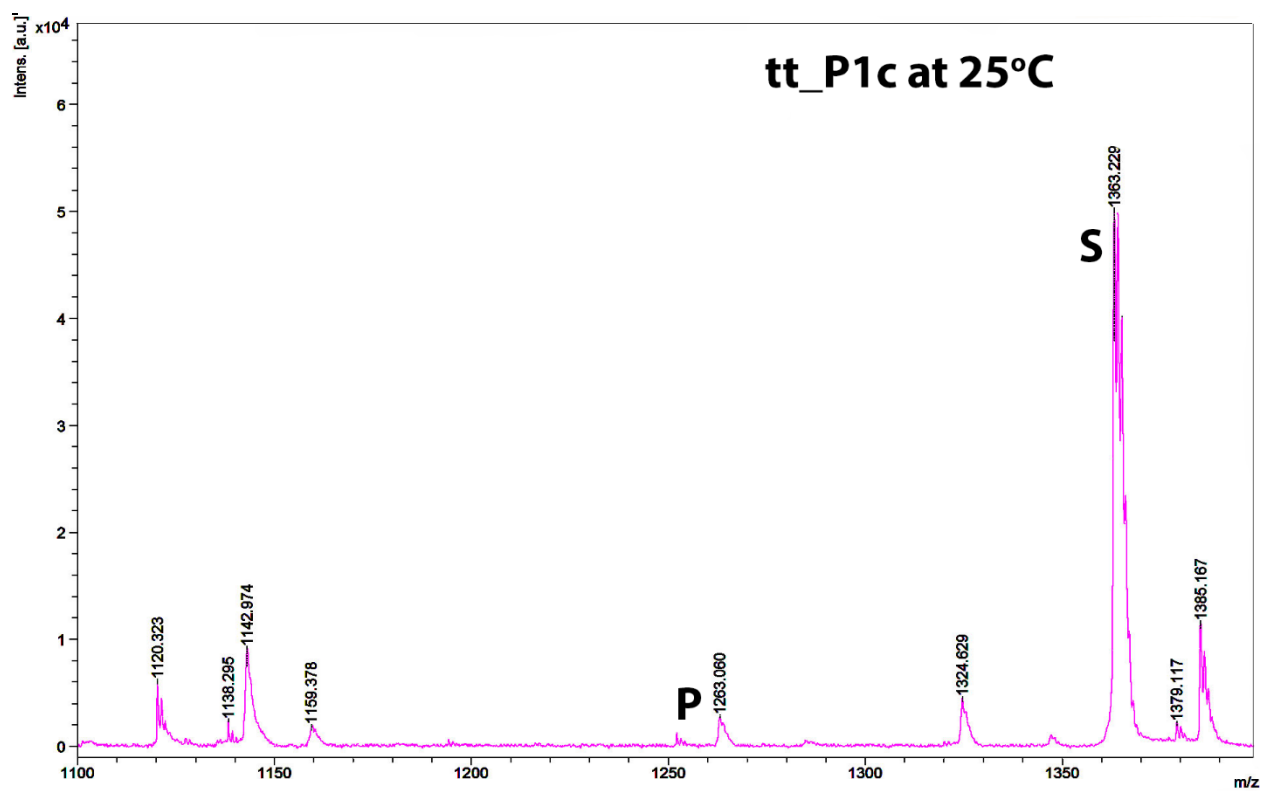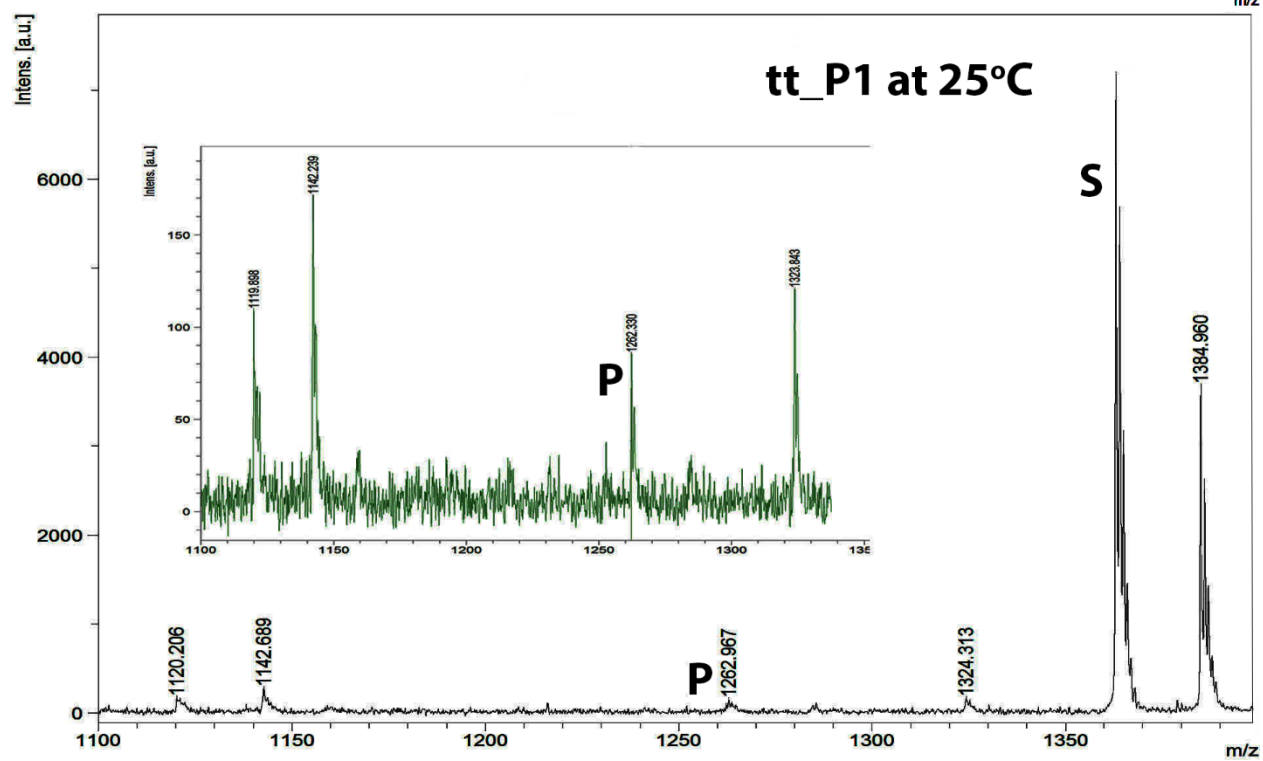

**C**

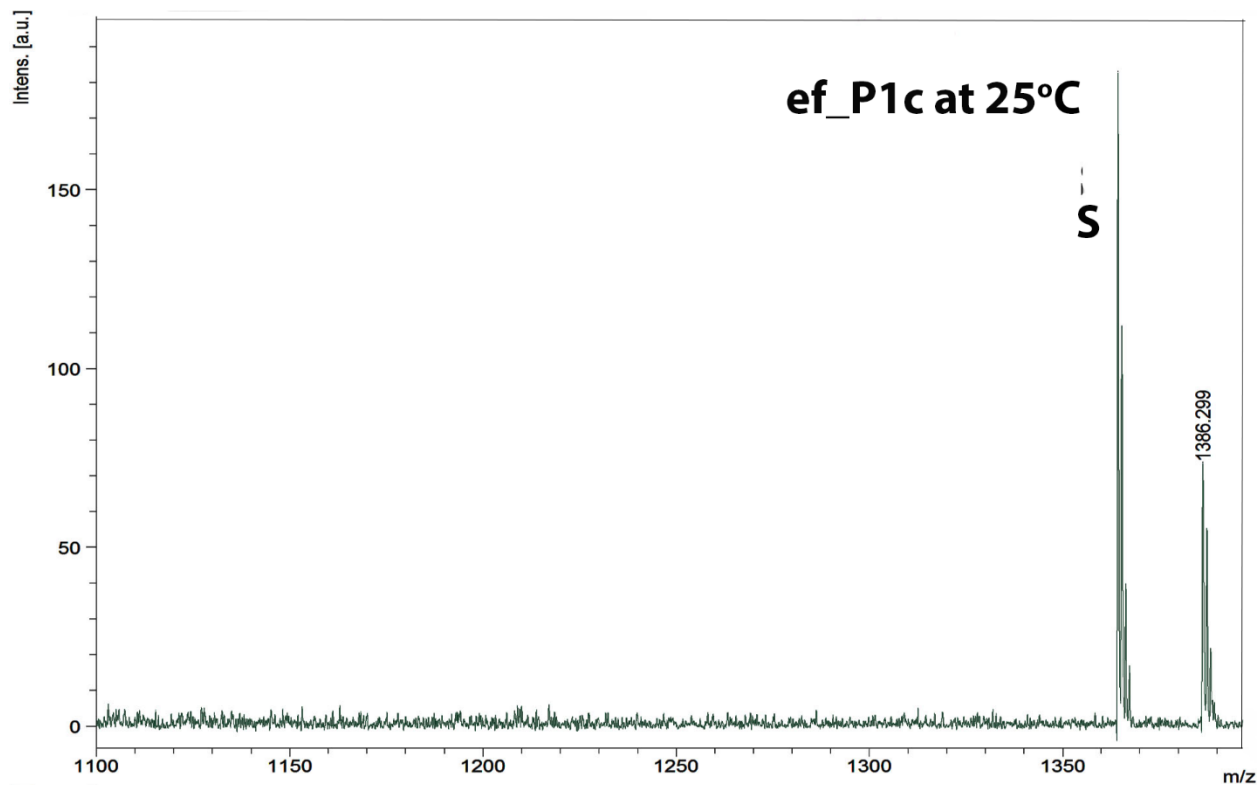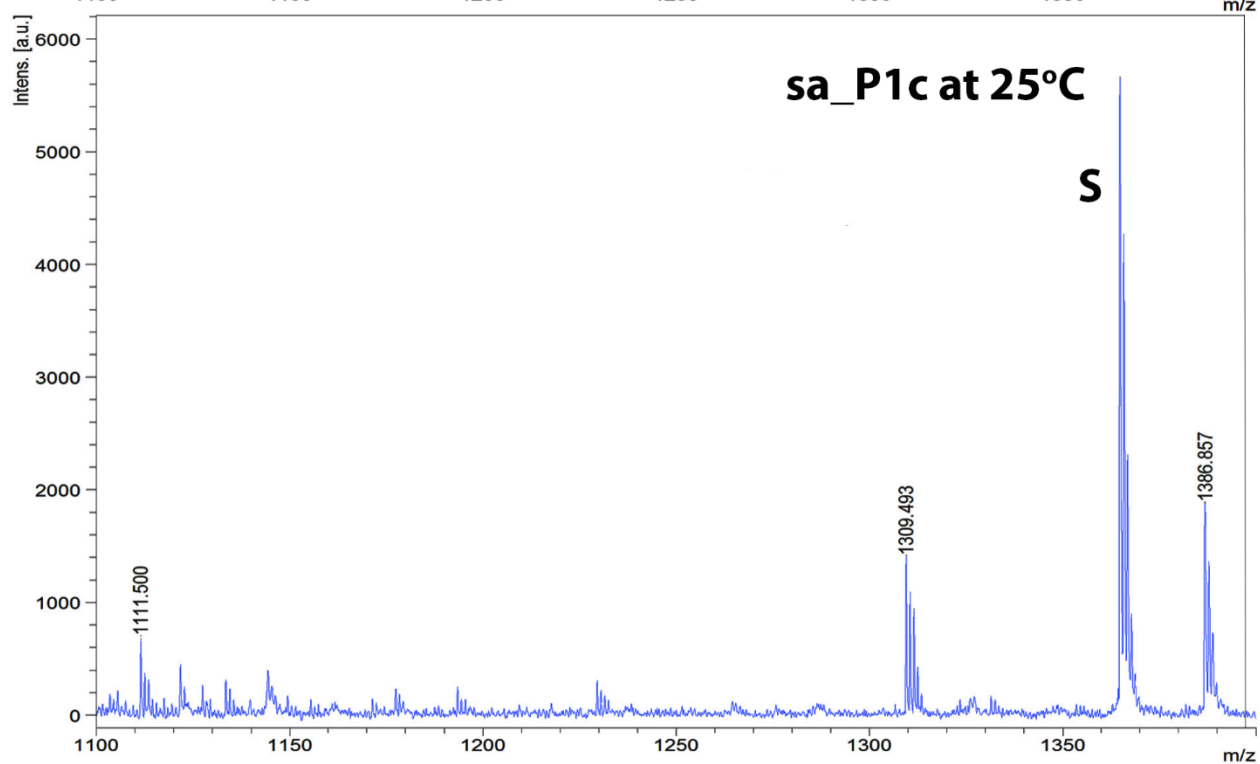

**Figure S17: MALDI spectra of the reaction mixtures at 50°C. A.** positive control (50S) and the construct tt\_A1P1 **B.** The constructs tt\_P1c and tt\_P1. **C.** The constructs sa\_P1c and ef\_P1c.

**A**

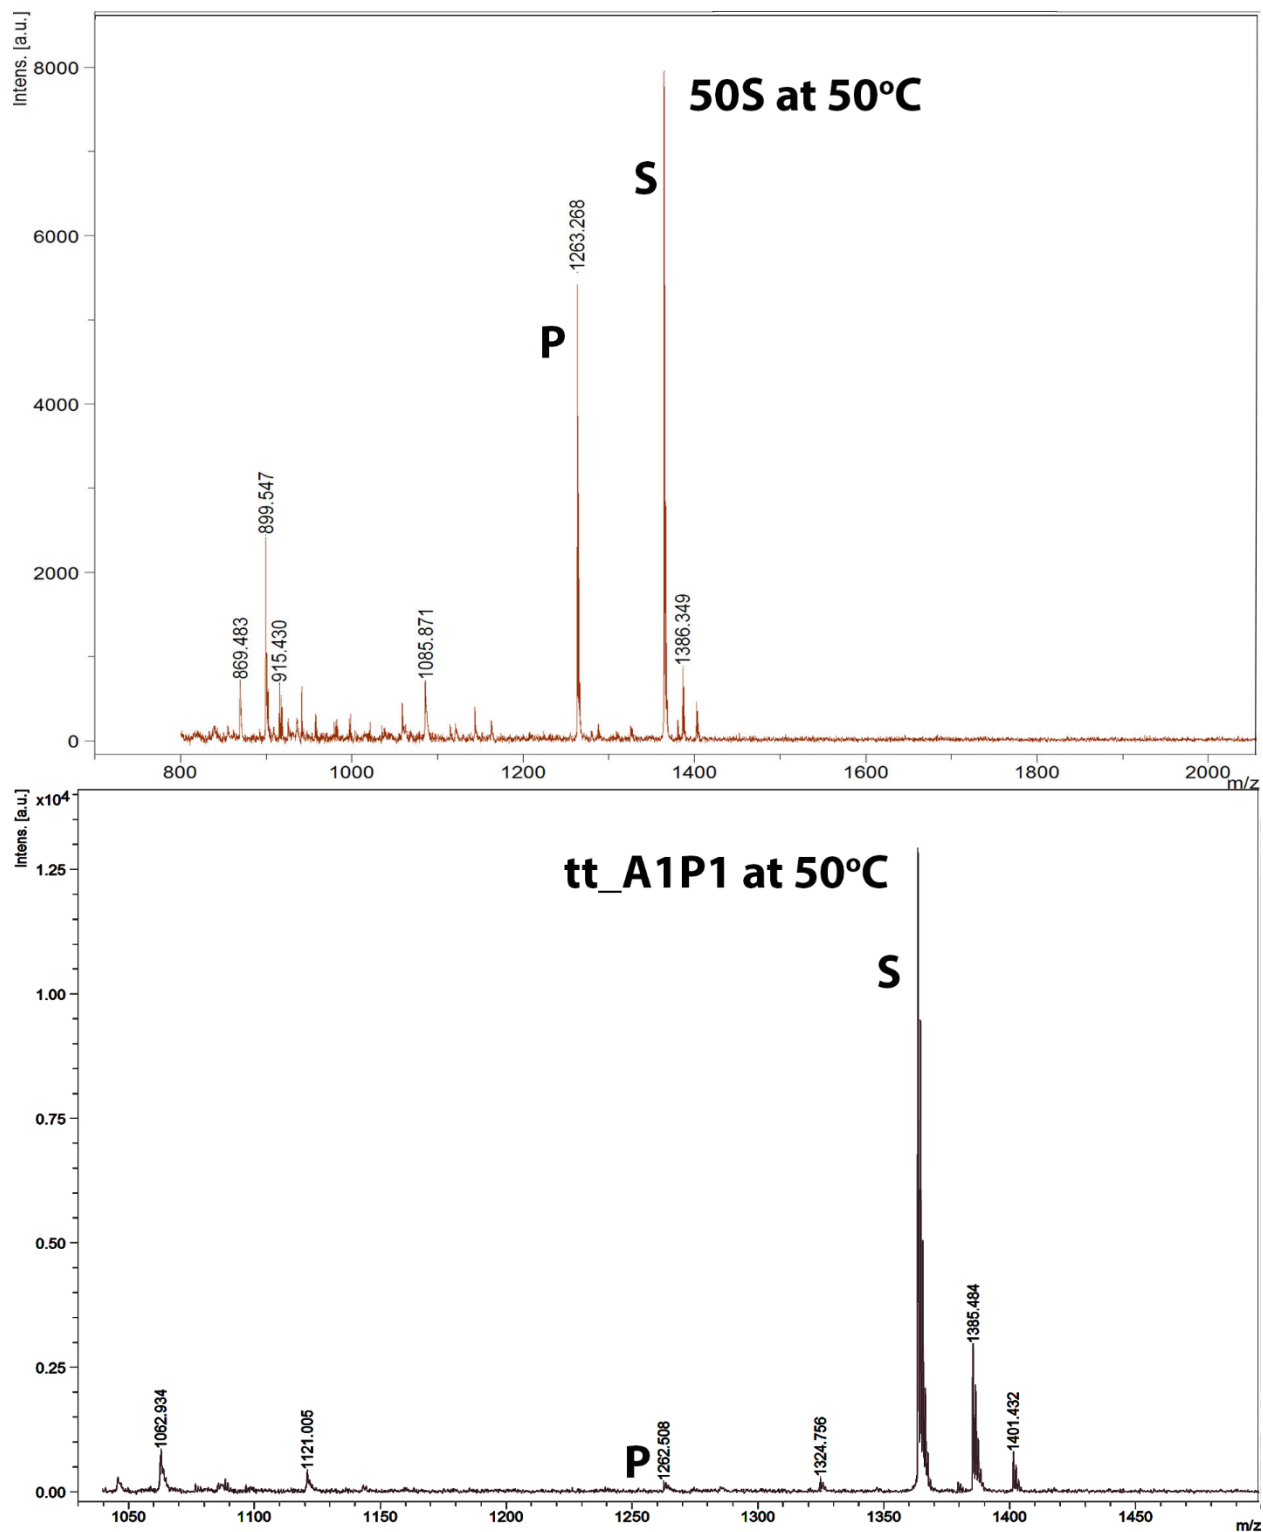

**B**

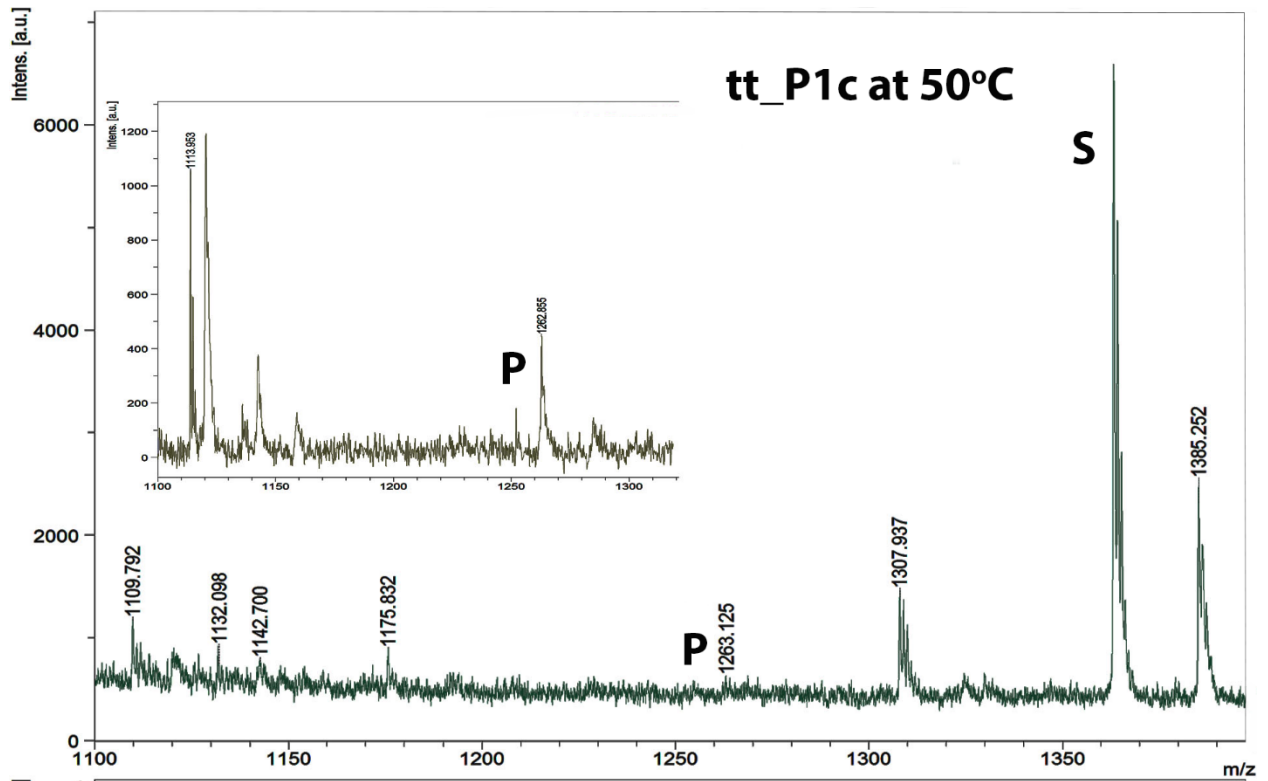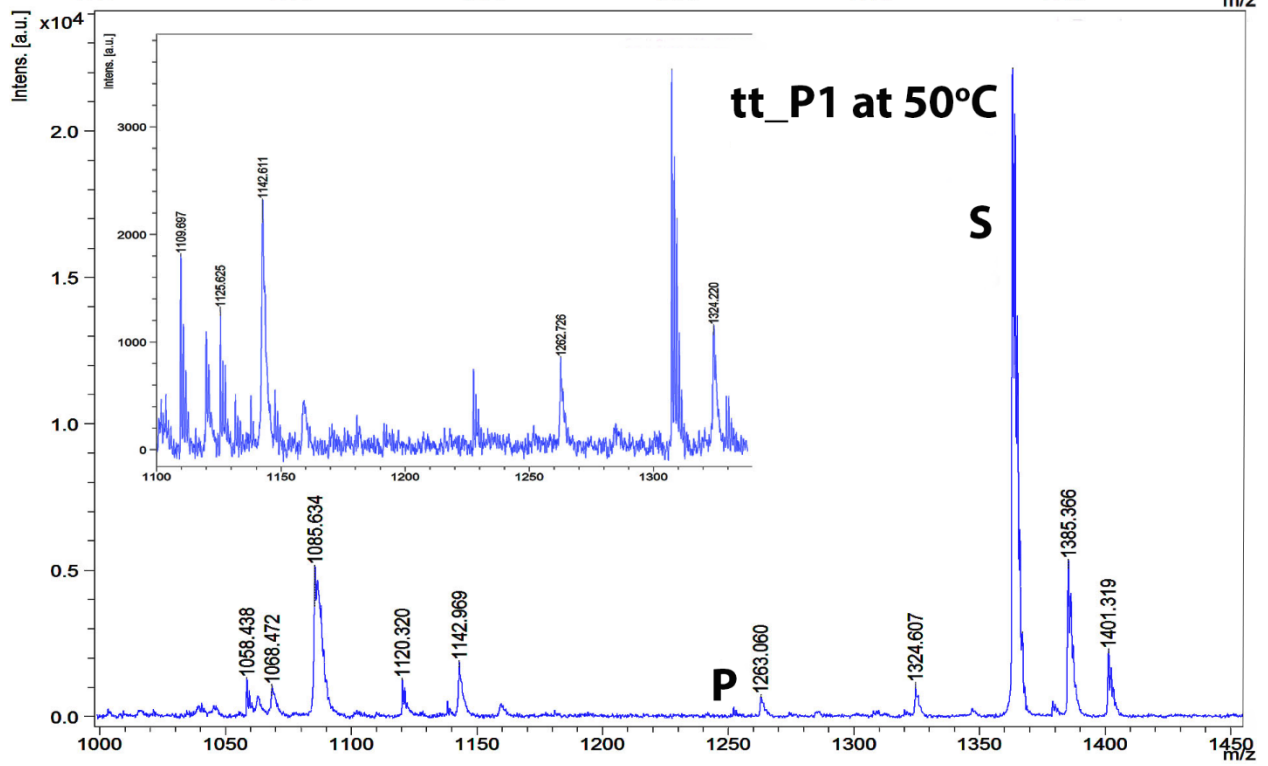

C

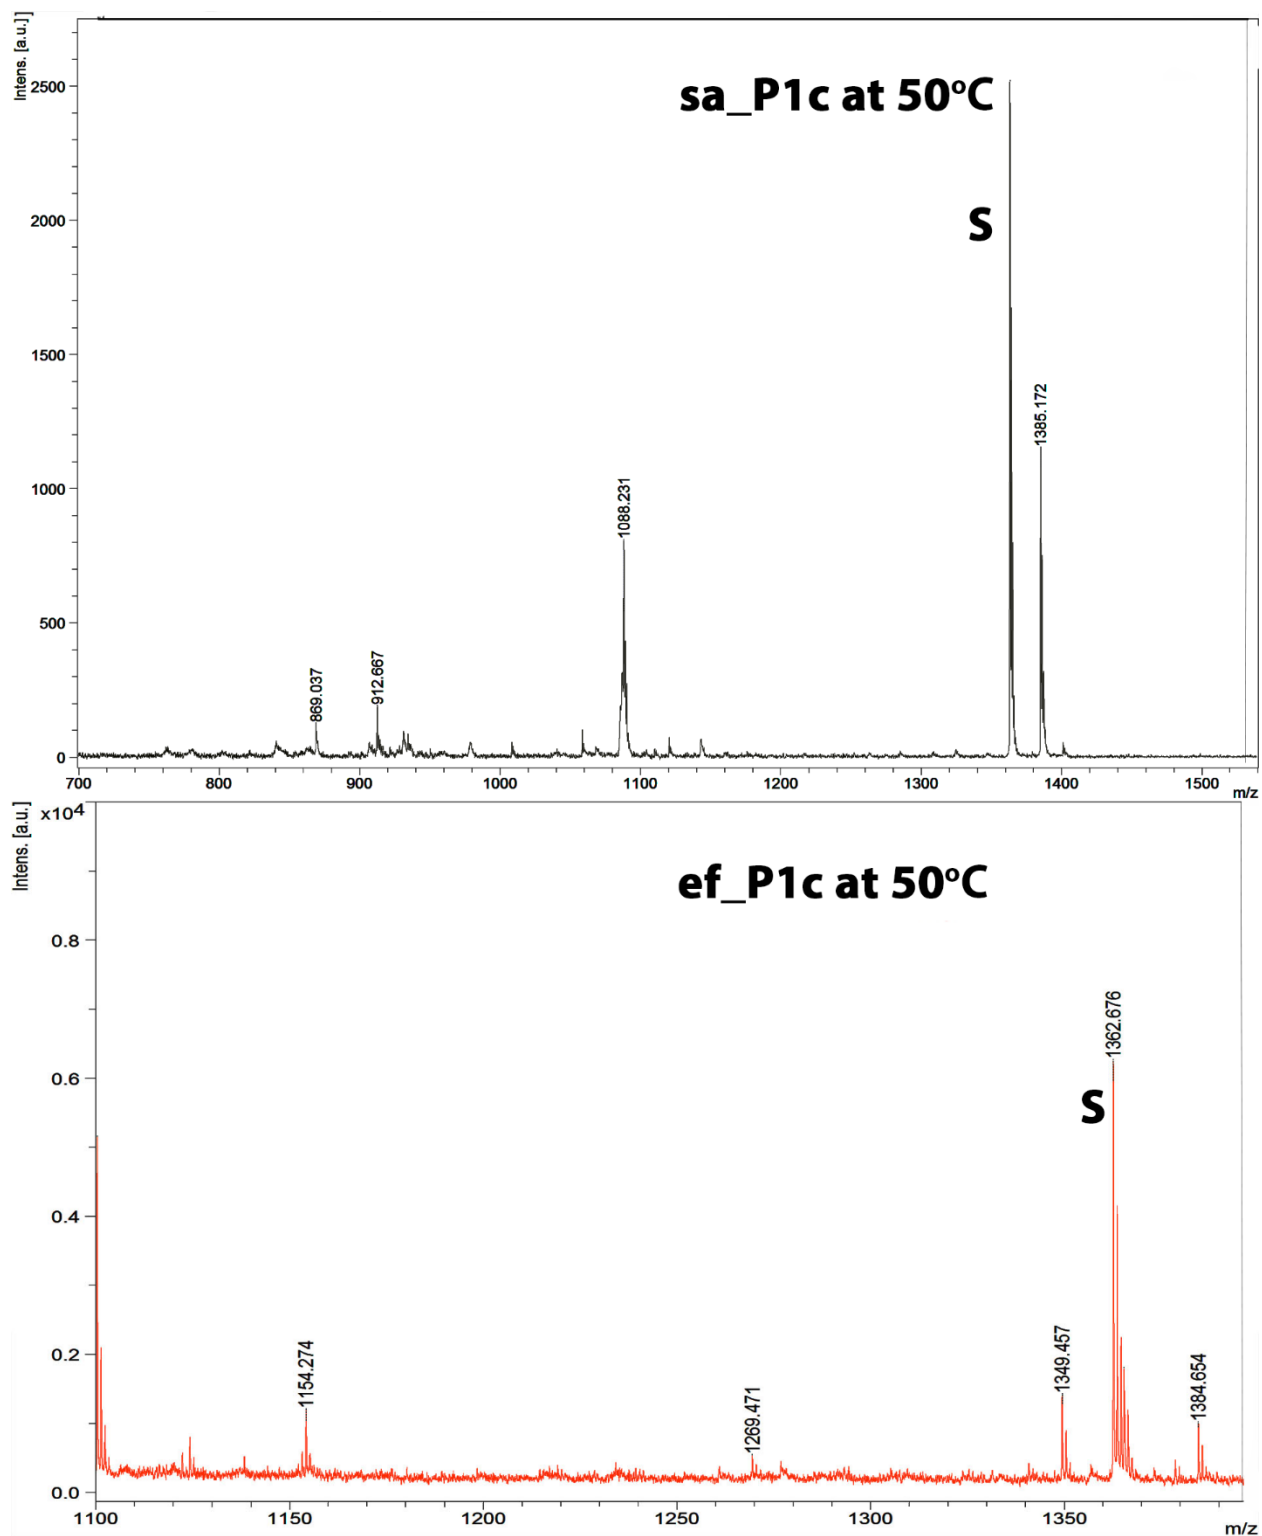



**Figure S18: EtBr stained native gel of RNA constructs under various controlled conditions of dimerization.** **A-C.** tt\_P1c, tt\_P1, and tt\_A1P1, respectively in the absence of salts. **D.** tt\_P1, tt\_P1c, and tt\_A1P1 with 30 mM KCl and no Mg<sup>2+</sup> **E.** tt\_P1c, tt\_P1, and tt\_A1P1 with no salts but in the presence of the substrates CCA-pcb and C-Pmn. **F.** tt\_A1, tt\_A2 and ec\_P1c at 20 μM RNA concentration. Gels were imaged at the wavelength of 254nm.

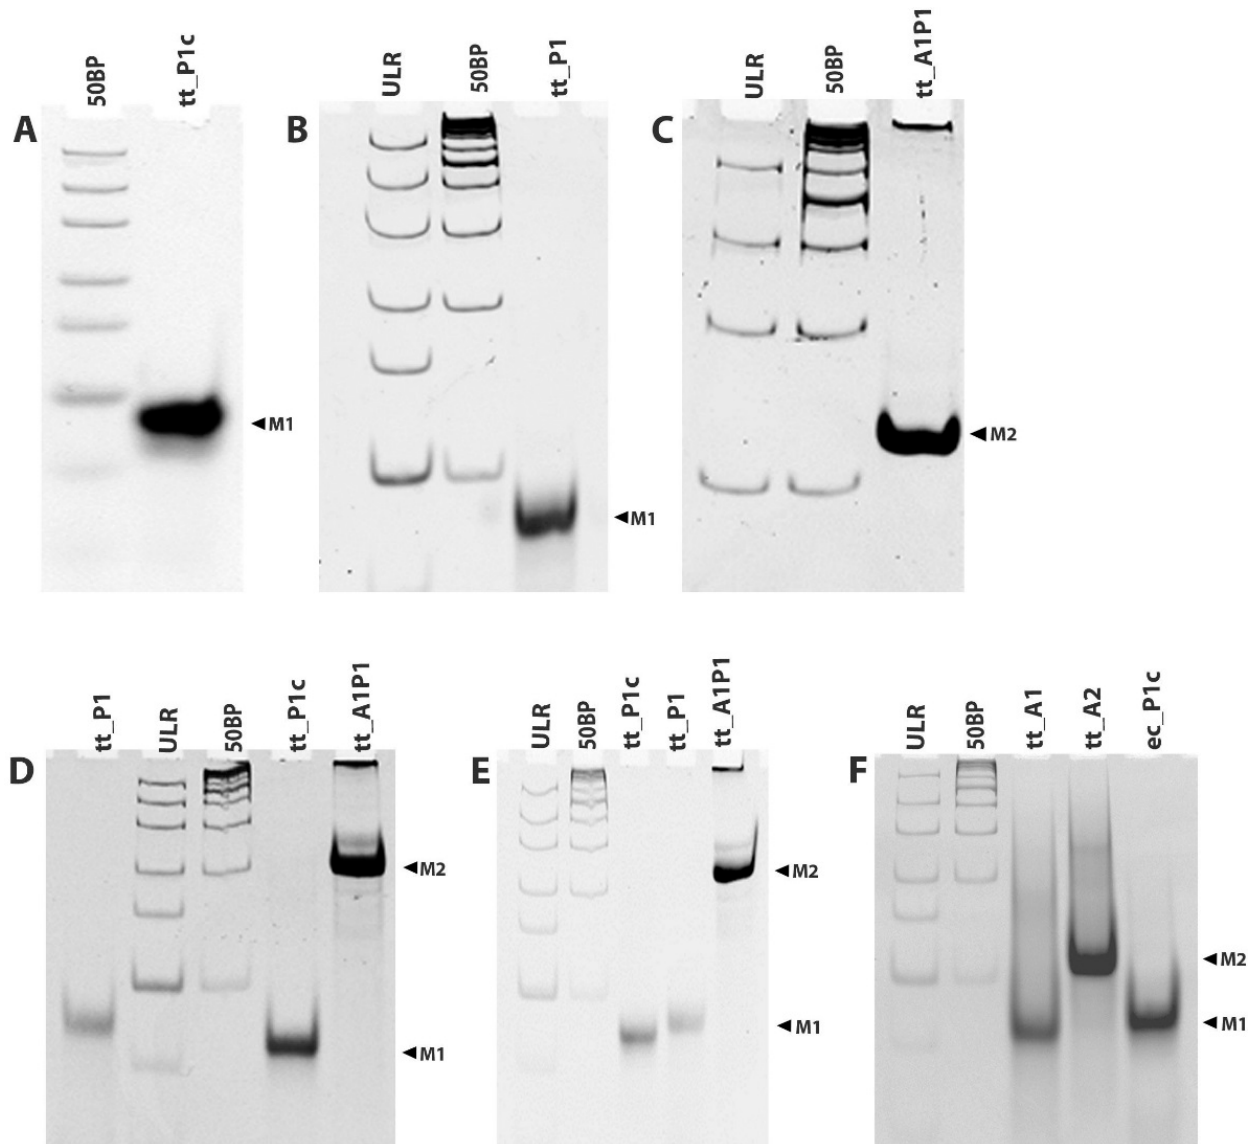

**Figure S19: MALDI spectra of tt\_A1P1, tt\_P1 and tt\_P1c reactions performed in the absence of KCl and MgCl<sub>2</sub> (salts) or in the absence of MgCl<sub>2</sub>.**

**A**

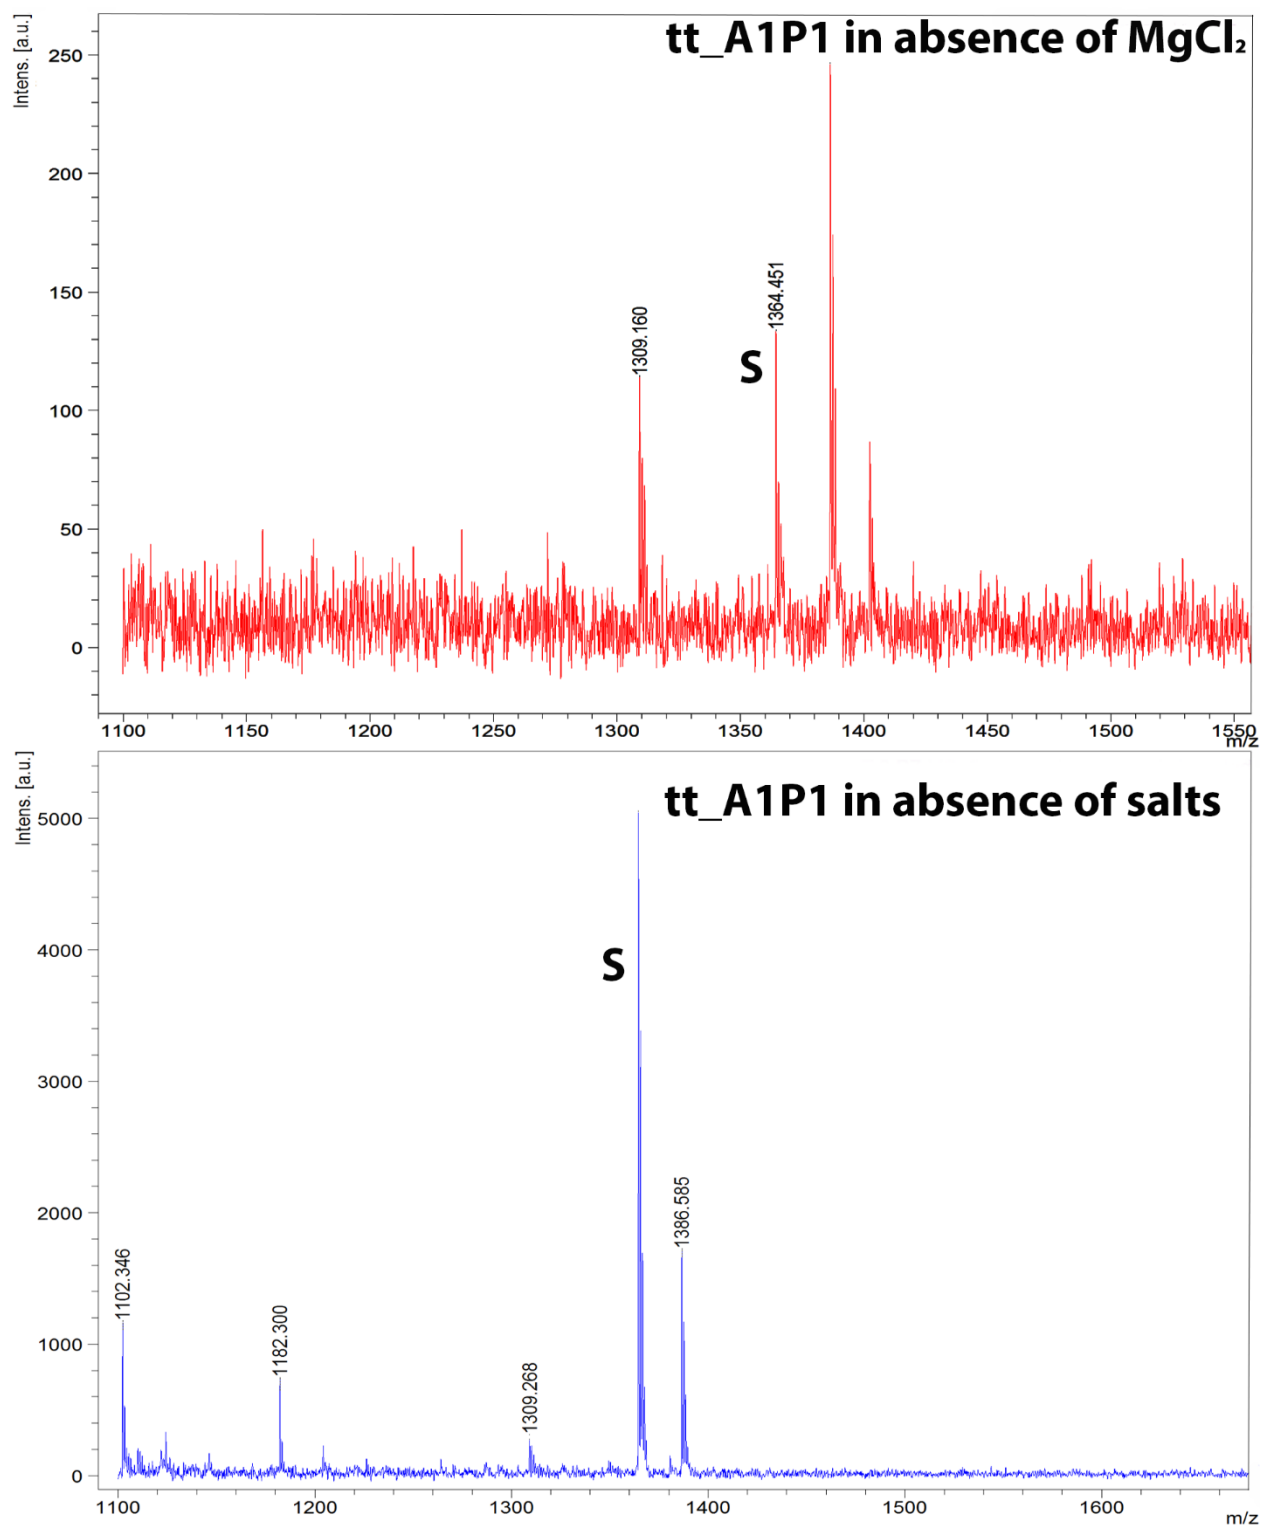

**B**

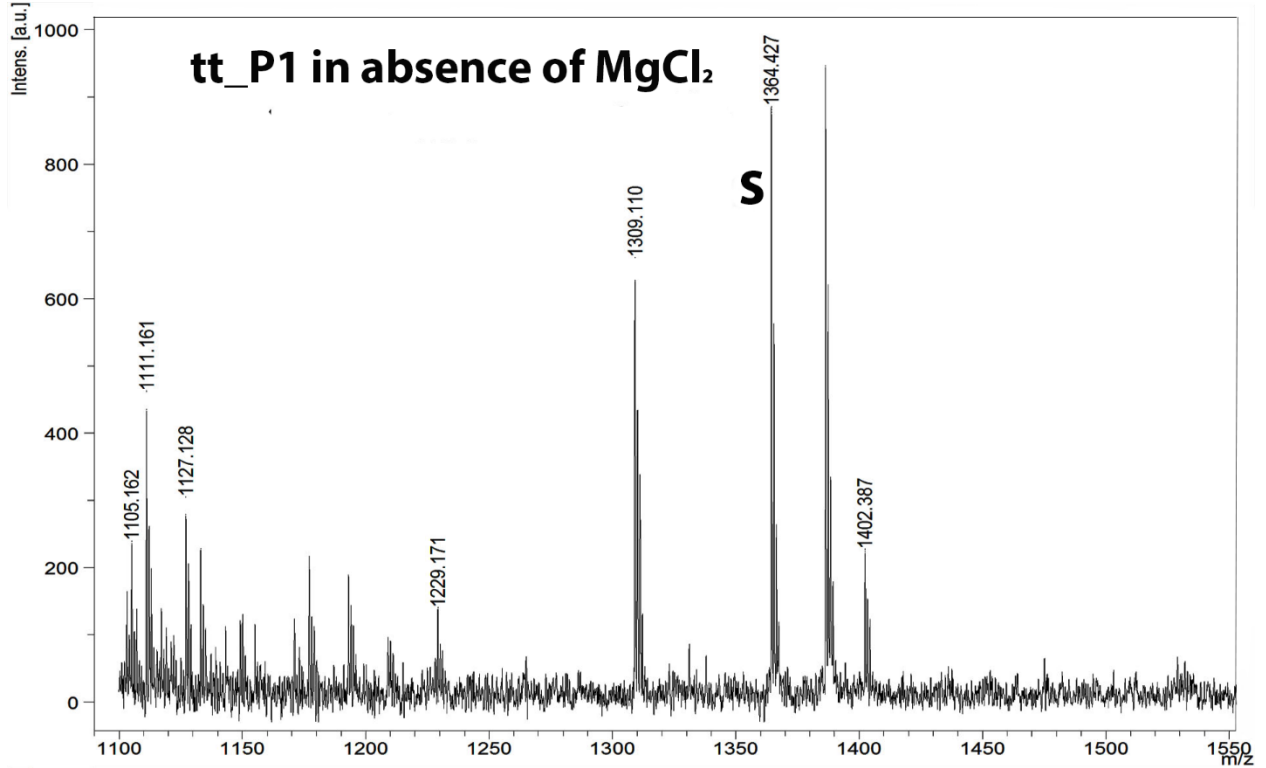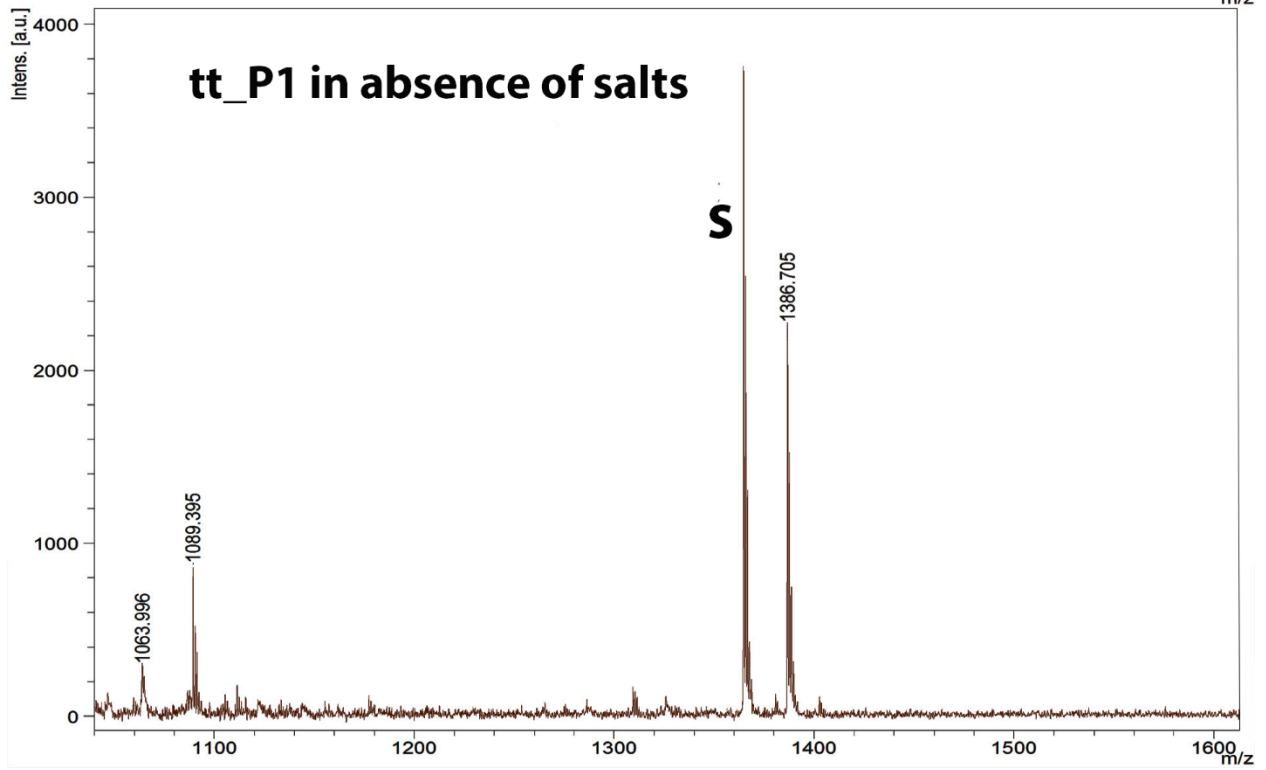

**C**

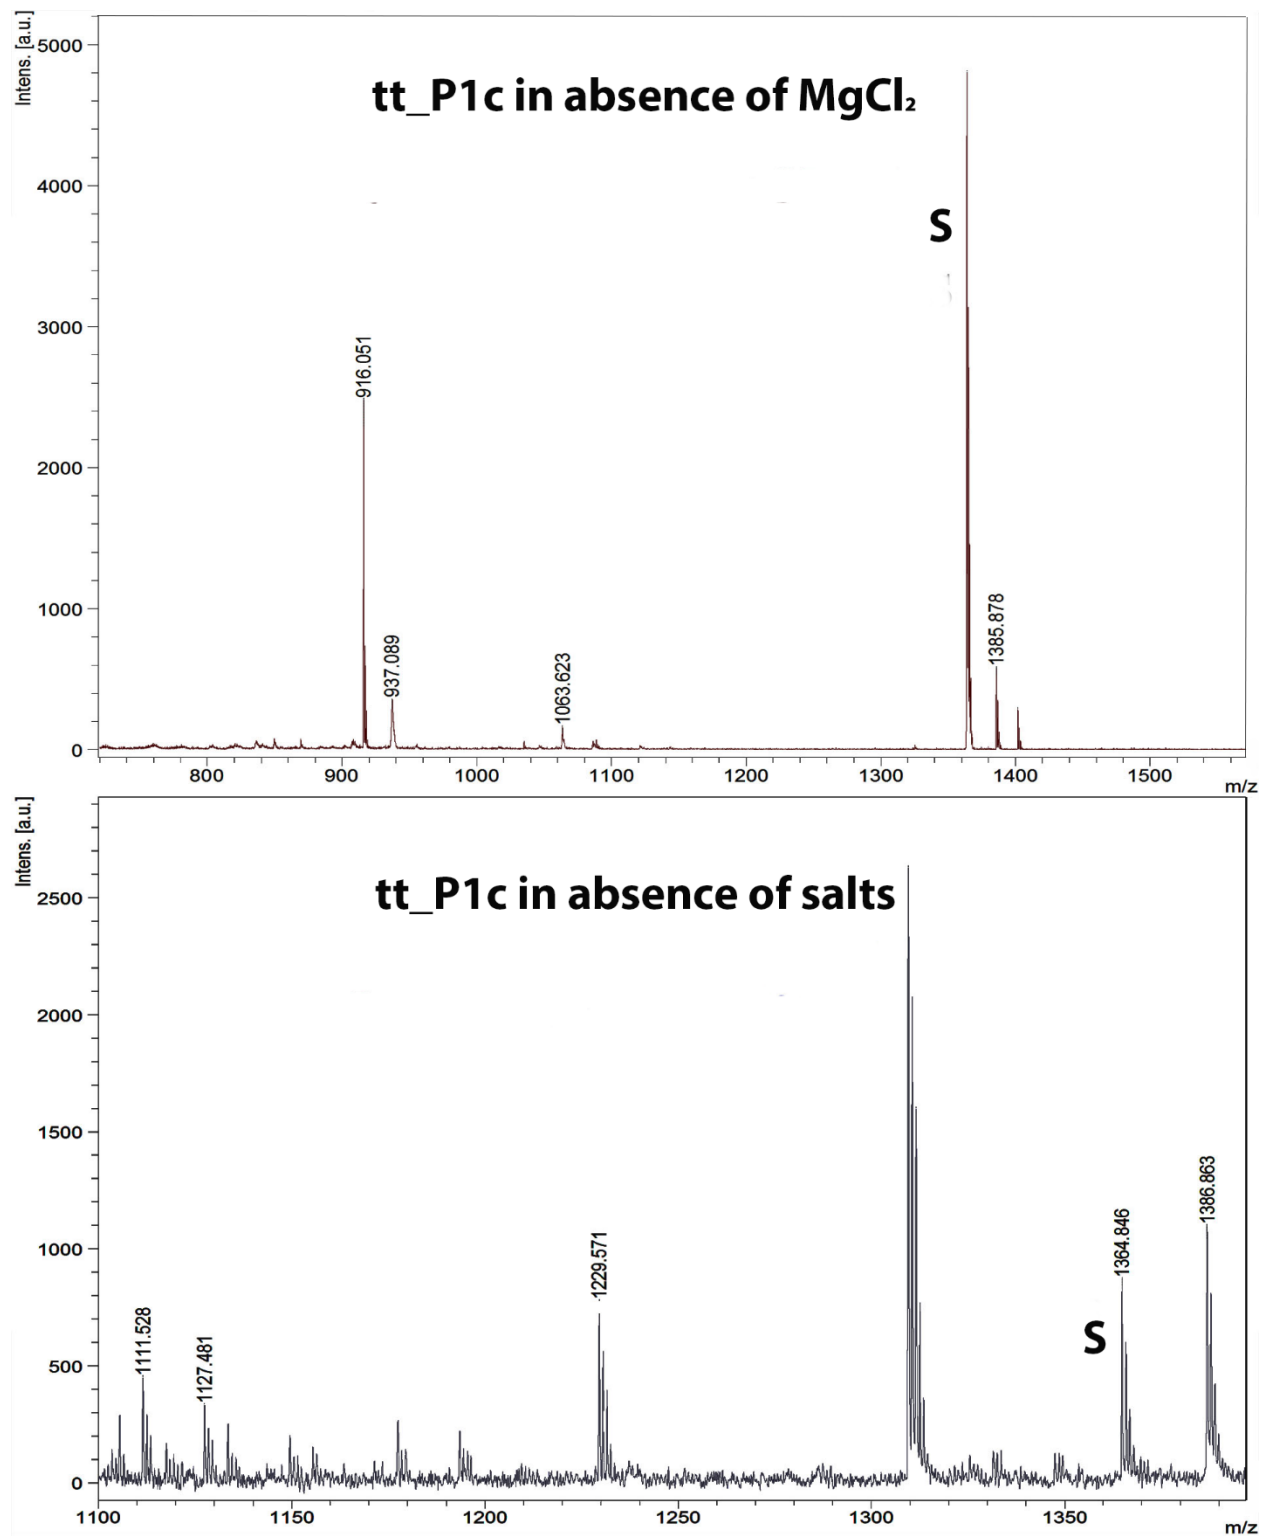

## Derivation of Equation used to calculate the dimerization constant ( $K_d$ )

The reaction between a labelled and unlabelled oligomer can be represented as follows:

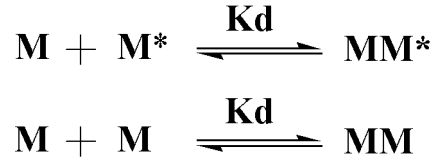

[M = Unlabelled oligomer, M\* = Labelled oligomer]

Since, the labelled and unlabelled oligomers are same RNA sequences, we assume that they have same  $K_d$

$$\mathbf{K}_d = \frac{[\mathbf{M}][\mathbf{M}^*]}{[\mathbf{MM}^*]} = \frac{[\mathbf{M}][\mathbf{M}]}{[\mathbf{MM}]}$$

$$\mathbf{M}_0^* = [\mathbf{M}^*] + [\mathbf{MM}^*] \quad \mathbf{M}_0^* = \text{Total Concentration of labelled oligomer}$$

$$\mathbf{M}_0 = [\mathbf{M}] + 2[\mathbf{MM}] + [\mathbf{MM}^*] \quad \mathbf{M}_0 = \text{Total concentration of unlabelled oligomer}$$

$$\mathbf{Y} = \frac{[\mathbf{MM}^*]}{[\mathbf{MM}^*] + [\mathbf{M}^*]} * \mathbf{100} \quad \text{where Y = Dimer Fraction \%}$$

Substituting the values in the above equation,

$$\mathbf{Dimer \%} = \left\{ \frac{\sqrt{\mathbf{K}_d(\mathbf{K}_d + 8\mathbf{x})} - \mathbf{K}_d - 2\mathbf{x}}{2(\mathbf{K}_d - \mathbf{x})} \right\} * \mathbf{100} \quad (1)$$

Where X =  $M_0$  or concentration of the unlabelled oligomers

Y = Dimer %

$$\mathbf{where, Dimer}^0\% = \frac{[\mathbf{Dimer}]}{[\mathbf{Dimer} + \mathbf{Monomer}]} * \mathbf{100} \quad (2)$$

**Figure S20: Determination of the dimerization constant ( $K_d$ ) of the RNA constructs using fluorescently imaged EMSA native gels. A-F. Dimerization was assayed at increasing RNA concentrations from 0.0 $\mu$ M (left) to 42 $\mu$ M (right) (lanes 1-12 RNA concentrations were 0, 0.08, 0.16, 0.24, 0.4, 0.72, 1.36, 2.46, 5.2, 10.4, 21 and 42 $\mu$ M respectively), with constant (0.15  $\mu$ M) Fluorecein-5-thiosemicarbazide labelled RNA concentration in all lanes. EMSA was performed for tt\_P1c, tt\_A1P1, tt\_P1, tt\_P1m, sa\_P1c and ef\_P1c constructs, respectively.**

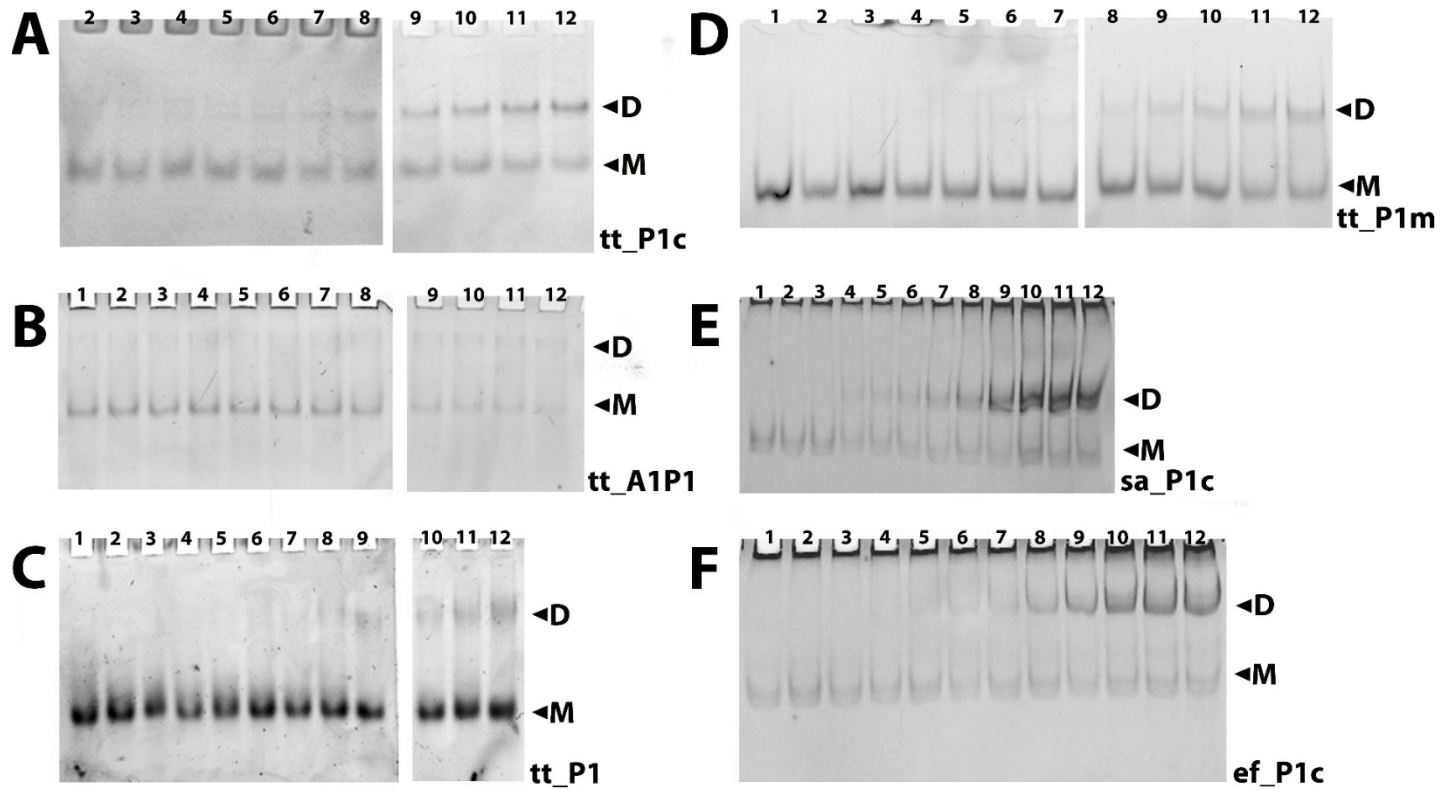

**Figure S21: EtBr staining of the native gels used for the determination of the  $K_d$  of the RNA constructs. A-G.** RNA construct dimerization is shown for tt\_P1c, tt\_A1P1, tt\_P1, tt\_P1m, tt\_P1n, sa\_P1c and ef\_P1c, respectively. Dimerization was assayed at increasing RNA concentrations from 0.0 $\mu$ M (left) to 42 $\mu$ M (right), with constant (0.15 $\mu$ M) labelled RNA concentration in all lanes (lanes 1-12 RNA concentrations are: 0, 0.08, 0.16, 0.24, 0.4, 0.72, 1.36, 2.46, 5.2, 10.4, 21 and 42  $\mu$ M, respectively). Gels were imaged at a wavelength of 254nm.

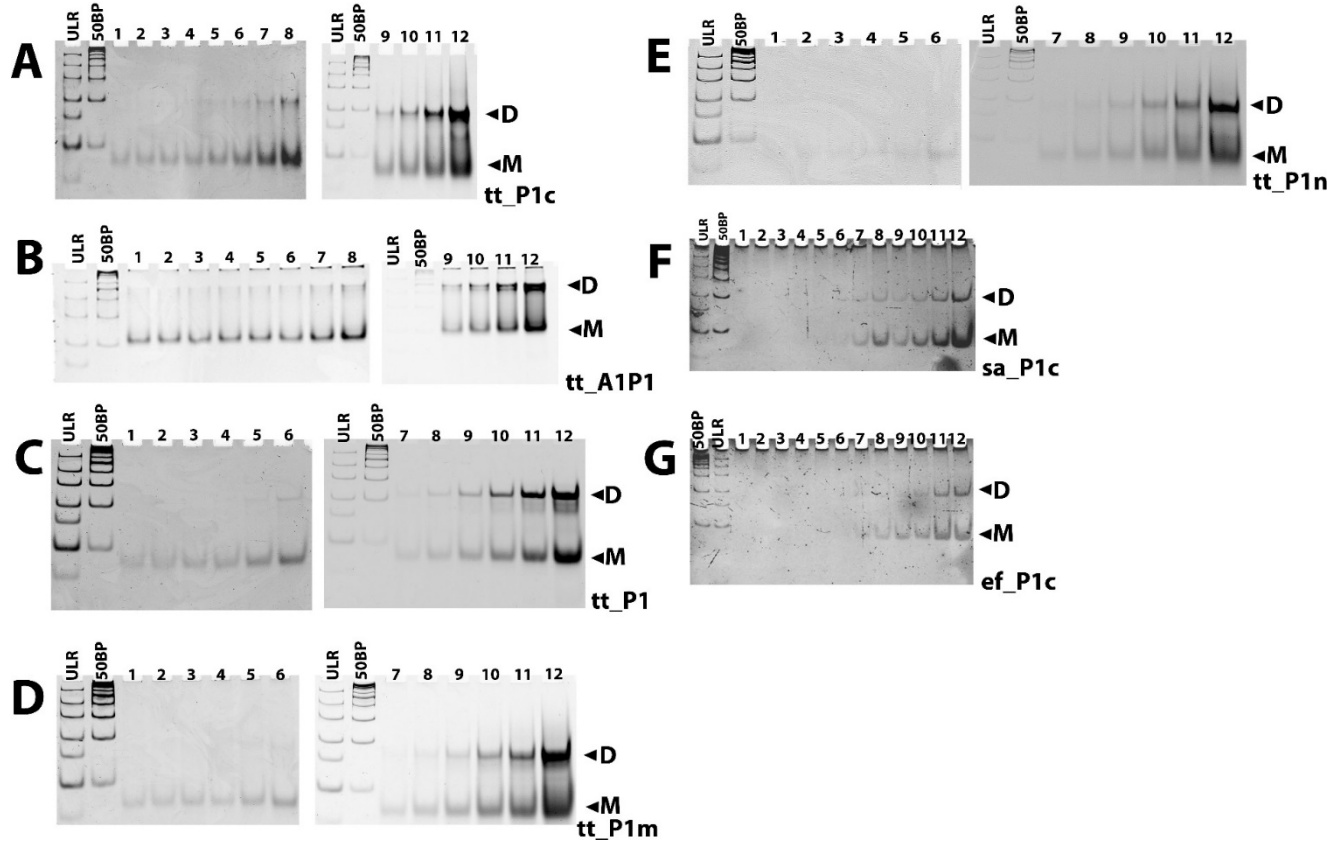

**Table S1: Sequences of the RNA constructs**

| RNA Construct | Sequence*                                                                                                                                                                                                                    |
|---------------|------------------------------------------------------------------------------------------------------------------------------------------------------------------------------------------------------------------------------|
| tt_A1         | GAUGUCGGCUCGUCG <b>CUUCGG</b> CGGCACGCGAGCUGGGUUCAGAACGUCGUGAGACAGUUCGGUC                                                                                                                                                    |
| tt_P1         | GAAGACCCCGUGGAGCU <b>CUUCGG</b> AGUUACCCCGGGGAU AACAGGCU GAUCU <b>CUUCGG</b> AGGUUUGGCACCUC                                                                                                                                  |
| tt_A1P1       | GAAGACCCCGUGGAGCU <b>CUUCGG</b> AGUUACCCCGGGGAU AACAGGCU GAUCU <b>CUUCGG</b> AGGUUUGGCACCUCGAUGUCGGCUCGUCG <b>CUUCGG</b> CGGCACGCGAGCUGGGUUCAGAACGUCGUGAGACAGUUCGGUC                                                         |
| tt_A2         | GAUGUCGGCUCGUCGCAUC <b>CUUCGG</b> GUUGGGCUGUUCGCCAUUAAAGCGGCACGCGAGCUGGGUUCAGAACGUCGUGAGACAGUUCGGUC                                                                                                                          |
| tt_P2         | GAAGACCCCGUGGAGCUUUACU <b>CUUCGG</b> AGUUUGACUGGGGCGGUCCGGAUAAAAGUUACCCCGGGGAU AACAGGCUGAUCU <b>CUUCGG</b> AGGUUUGGCACCUC                                                                                                    |
| tt_A2P2       | GAAGACCCCGUGGAGCUUUACU <b>CUUCGG</b> AGUUUGACUGGGGCGGUCCGGAUAAAAGUUACCCCGGGGAU AACAGGCUGAUCU <b>CUUCGG</b> AGGUUUGGCACCUCGAUGUCGGCUCGUCGCAUC <b>CUUCGG</b> GUUGGGCUGUUCGCCAUUAAAGCGGCACGCGAGCUGGGUUCAGAACGUCGUGAGACAGUUCGGUC |
| tt_P2c        | GAAGACCCCGUGGAGCUUUACU <b>CUUCGG</b> AGUUUGACUGGGGCGGUCCGGAUAAAAGUUACCCCGGGGAU AACAGGCUGAUC <b>GUGA</b> GGUUUGGCACCUC                                                                                                        |
| tt_P1c        | GAAGACCCCGUGGAGCU <b>CUUCGG</b> AGUUACCCCGGGGAU AACAGGCU GAUC <b>GUGA</b> GGUUUGGCACCUC                                                                                                                                      |
| ec-P1c        | AAAGACCCCGUGAACCU <b>CUUCGG</b> AGGUACUCCGGGGAU AACAGGCU GAUC <b>GUGA</b> UGUUUGGCACCUC                                                                                                                                      |
| sa_P1c        | GAAGACCCCGUGGAGCU <b>CUUCGG</b> AGCUACCCCGGGGAU AACAGGCU UAUC <b>GUGA</b> GGUUUGGCACCUC                                                                                                                                      |
| ef_P1c        | GAAGACCCCAUGGAGCU <b>CUUCGG</b> AGCUACCCUGGGGAU AACAGGCU UAUC <b>GUGA</b> GGUUUGGCACCUC                                                                                                                                      |
| tt_P1m        | GAAGACCCCGUGGAGCUU <b>UAAG</b> UUACCCCGGGGAU AACAGGCUGAUC <b>GUGA</b> GGUUUGGCACCUC                                                                                                                                          |
| tt_P1n        | GAAGACCCCGUGGAGCU <b>UUAAG</b> UUACCCCGGGGAU AACAGGCUGAUC <b>GUGA</b> GGUUUGGCACCUC                                                                                                                                          |
| com_tt_P1c    | GAGGUGCCAAACCUACGAUCAGCCUGUUAUCCCGGGGUAACUCCGAAGAGCUCCACGGGGUCUUC                                                                                                                                                            |

\* Closing inserted loops are colored; hyper stable CUUCGG loop is colored red, GNRA (GUGA) tetraloop is colored cyan and H74 natural loop is colored green.
